# Supplementary material for: Noise-augmented directional clustering of genetic association data identifies distinct mechanisms underlying obesity
Source: PLoS Genet. 2022 Jan 27;18(1):e1009975. doi: 10.1371/journal.pgen.1009975 (PMC8794082; doi:10.1371/journal.pgen.1009975)
Supplement: S1 Table — (XLSX) [file pgen.1009975.s002.xlsx]

## Sheet: S1 Table
Allocated cluster and probability of membership to each cluster for each BMI associated genetic variant.
					Probability of Cluster Membership
rsid	Chr	Pos	Allocated Cluster	Cluster 1	Cluster 2	Cluster 3	Cluster 4	Cluster 5	Noise
rs79113395	1	1590521	1	0.512488	0.413343	0.0206574	0.0535013	7.49844e-08	9.88184e-06
rs10909880	1	2727804	1	0.664263	0.279906	0.0407713	0.0150559	5.21157e-09	3.52731e-06
rs11121210	1	8708529	1	0.847598	0.0824391	0.0474636	0.0224719	7.02788e-08	2.70255e-05
rs2228552	1	32165495	1	0.572648	0.199001	0.0387648	0.189545	8.86454e-07	4.0167e-05
rs7512146	1	34283008	1	0.978606	0.00325011	0.0171692	0.000973605	2.29228e-09	6.98489e-07
rs11577094	1	38026600	1	0.863635	0.0590725	0.0509257	0.0263278	1.19332e-07	3.90418e-05
rs2984618	1	47690438	1	0.927872	0.0528297	0.017029	0.0022684	2.32152e-09	1.00757e-06
rs657452	1	49589847	1	0.946217	0.0199148	0.0289729	0.00489353	2.31166e-09	1.84414e-06
rs79906980	1	57887985	1	0.977622	0.00210084	0.0200991	0.000176963	7.93178e-10	6.91342e-07
rs12140153	1	62579891	1	0.917945	0.0623685	0.0195639	0.00012182	3.64089e-11	3.48286e-07
rs2503185	1	66461401	1	0.712482	0.00234164	0.0356288	0.249462	1.53766e-06	8.3607e-05
rs6696828	1	80812020	1	0.981523	0.0116134	0.00609141	0.000771785	1.6975e-10	2.66987e-07
rs11165643	1	96924097	1	0.921883	0.069907	0.00643044	0.00177909	1.31726e-09	3.17719e-07
rs12072739	1	98315893	1	0.874034	0.0112387	0.11356	0.00116315	2.31055e-09	3.35091e-06
rs197374	1	112289983	1	0.950794	0.00965244	0.0373217	0.00222859	6.84285e-10	3.39335e-06
rs17544384	1	115295160	1	0.990493	0.00298546	0.00608818	0.000432756	3.76398e-10	5.53959e-07
rs61813324	1	156049877	1	0.830952	0.157503	0.010847	0.000697378	9.61547e-11	3.91865e-07
rs543874	1	177889480	1	0.785497	0.197516	0.00898684	0.00799929	2.66099e-09	7.48593e-07
rs10920678	1	190239907	1	0.666196	0.311761	0.0128611	0.00917986	1.64954e-08	1.96108e-06
rs2400414	1	194965200	1	0.4942	0.423897	0.0664719	0.0154267	7.25375e-08	3.6713e-06
rs2820295	1	201800868	1	0.983803	0.00980513	0.00627925	0.000112203	8.93327e-11	1.60909e-07
rs10920336	1	202115945	1	0.847496	0.0143038	0.0178423	0.120325	1.27739e-07	3.27181e-05
rs946824	1	243684019	1	0.928435	0.0321817	0.0389922	0.000390284	5.37202e-10	7.87926e-07
rs77165542	2	430975	1	0.511067	0.245247	0.0511058	0.192558	1.56885e-07	2.19486e-05
rs13021737	2	632348	1	0.887418	0.0825995	0.0108315	0.0191479	2.6125e-09	3.02896e-06
rs10929925	2	6155557	1	0.916833	0.0365145	0.0445901	0.00206047	2.80788e-10	1.66371e-06
rs10185199	2	40282202	1	0.823964	0.145084	0.0307207	0.000230109	1.00179e-10	6.07983e-07
rs10169594	2	41637688	1	0.969848	0.0239408	0.00511975	0.00109062	1.55137e-09	5.21515e-07
rs805412	2	54120820	1	0.63744	0.149192	0.210924	0.002437	1.23567e-09	6.04201e-06
rs6545714	2	59307725	1	0.921731	0.0653976	0.0126166	0.0002545	2.81935e-11	3.98679e-07
rs17020497	2	81826131	1	0.978322	0.0153844	0.00458263	0.00170967	1.41967e-10	1.09151e-06
rs4303732	2	100830040	1	0.974752	0.013861	0.00904983	0.00233527	2.46681e-09	1.60876e-06
rs264941	2	104297420	1	0.721471	0.000991869	0.244396	0.033048	2.51505e-07	9.28528e-05
rs17814208	2	144037998	1	0.878853	0.0558235	0.031613	0.0337062	2.29513e-08	4.51676e-06
rs11695013	2	157057487	1	0.737269	0.178172	0.0842149	0.000341838	4.85756e-10	2.16993e-06
rs12692596	2	161265910	1	0.951458	0.0203154	0.0257704	0.00245	2.34137e-10	6.21343e-06
rs62176243	2	166190881	1	0.993437	0.00193505	0.00342766	0.00119956	5.89154e-10	4.684e-07
rs7588437	2	181575281	1	0.931097	0.0616782	0.00694703	0.00027741	2.99906e-11	1.524e-07
rs11692326	2	208263279	1	0.890577	0.08589	0.00728077	0.0162461	1.48e-09	5.81973e-06
rs73985439	2	212299249	1	0.605221	0.376357	0.0160941	0.00232655	1.2239e-09	1.08597e-06
rs7599312	2	213413231	1	0.671682	0.183896	0.134198	0.0102172	9.05513e-09	6.49168e-06
rs6725931	2	220205146	1	0.992945	0.00116672	0.00512163	0.000766254	3.39077e-10	5.95913e-07
rs4973618	2	229002620	1	0.918944	0.0727147	0.00818494	0.000156549	3.00674e-11	1.75346e-07
rs6720868	2	230663576	1	0.838784	0.156003	0.00412606	0.00108634	3.9062e-10	2.30168e-07
rs7568228	2	236848488	1	0.892525	0.0615005	0.0432038	0.00276725	3.32507e-09	3.62773e-06
rs59302296	3	9507314	1	0.835603	0.133719	0.0291763	0.00150037	3.29095e-10	1.54729e-06
rs4858193	3	20441050	1	0.948299	0.0347759	0.0133075	0.00361635	1.34766e-09	1.57646e-06
rs4017425	3	44028764	1	0.895277	0.00188265	0.0932035	0.00962267	2.76143e-07	1.3628e-05
rs11713193	3	49924424	1	0.968918	0.00836759	0.0207983	0.00191164	2.16307e-09	4.28882e-06
rs2365389	3	61236462	1	0.955841	0.0381047	0.00485596	0.00119815	8.31986e-10	3.62291e-07
rs12636480	3	82719412	1	0.90113	0.0905419	0.00678892	0.00153923	1.67069e-10	3.98937e-07
rs9827823	3	84221774	1	0.856845	0.136546	0.00605018	0.000558519	3.91561e-10	2.03774e-07
rs34184235	3	86192846	1	0.734078	0.0163257	0.17766	0.0718698	1.03059e-06	6.62599e-05
rs11128021	3	88139016	1	0.786028	0.0261451	0.146311	0.0414944	4.58834e-08	2.12866e-05
rs1492014	3	94071481	1	0.983372	0.00907396	0.00746716	8.64117e-05	4.21692e-11	1.30158e-07
rs1436344	3	104606144	1	0.990907	0.00241018	0.00379679	0.00288525	1.11561e-09	8.49658e-07
rs7640424	3	107820063	1	0.394865	0.00058371	0.363236	0.240591	4.83799e-07	0.000724275
rs17681451	3	114399296	1	0.660991	0.312839	0.0258314	0.000337119	1.08328e-10	9.48916e-07
rs16851483	3	141275436	1	0.959772	0.0236081	0.0162634	0.000355558	1.93866e-10	6.61567e-07
rs355777	3	154034950	1	0.968575	0.00887834	0.0197181	0.00282758	6.41971e-09	1.23583e-06
rs39654	3	173095123	1	0.961351	0.0218723	0.0165884	0.000188374	4.52032e-11	3.12215e-07
rs6443750	3	181329682	1	0.989241	0.00335921	0.00728509	0.000114146	6.20622e-11	2.25996e-07
rs2051559	4	3298800	1	0.947125	0.0166159	0.0356887	0.000566364	6.58841e-10	3.74214e-06
rs12642970	4	16601492	1	0.978782	0.00374215	0.0169238	0.000551508	6.93545e-10	7.9868e-07
rs994596	4	18459828	1	0.866944	0.0860232	0.0462144	0.000818057	1.28018e-09	7.32326e-07
rs34811474	4	25408838	1	0.98287	0.0111655	0.00563345	0.000330631	4.96141e-10	4.18892e-07
rs73213484	4	28489339	1	0.980047	0.0126782	0.00684628	0.000428605	2.55314e-10	2.20205e-07
rs10002111	4	67815504	1	0.982097	0.000801516	0.0167388	0.000361577	8.25057e-10	1.03467e-06
rs10033843	4	77028783	1	0.977224	0.00189557	0.0200849	0.000793785	4.5283e-09	2.16783e-06
rs4286488	4	94440026	1	0.9354	0.0161546	0.00624997	0.0421891	9.8968e-09	6.52589e-06
rs3796432	4	96030402	1	0.967976	0.0256588	0.00602679	0.000338291	5.10306e-11	3.29917e-07
rs326893	4	112691776	1	0.687128	0.302555	0.00924871	0.00106737	1.90364e-10	5.74879e-07
rs17367750	4	140782542	1	0.971365	0.00611663	0.0180048	0.00450674	1.13661e-08	7.13721e-06
rs13110266	4	162129844	1	0.820821	0.0117348	0.149776	0.0176569	3.85674e-08	1.10844e-05
rs7685628	4	165310133	1	0.96	0.0153949	0.0236595	0.000944501	4.42388e-10	9.79905e-07
rs1522569	4	171632637	1	0.495374	0.473423	0.027985	0.00321429	3.2706e-10	3.63312e-06
rs1437842	4	173597016	1	0.968119	0.00128366	0.0300881	0.000506574	5.58817e-10	2.56846e-06
rs698147	5	3513485	1	0.958059	0.00990065	0.0313715	0.000667918	7.19614e-10	1.40158e-06
rs6890310	5	27193573	1	0.967138	0.0235619	0.00898241	0.00031708	2.63081e-10	3.88192e-07
rs7730004	5	43191033	1	0.965658	0.0118449	0.020995	0.00149962	6.17988e-10	1.99584e-06
rs150215901	5	50935903	1	0.760671	0.213463	0.0254502	0.000415456	3.17949e-10	3.26722e-07
rs4700608	5	63026280	1	0.984682	0.00301628	0.00749795	0.00480104	1.73559e-08	2.42125e-06
rs10050620	5	63927239	1	0.960416	0.00680879	0.0275342	0.00523879	6.5422e-09	2.4186e-06
rs2112347	5	75015242	1	0.782145	0.201408	0.0155406	0.000905777	1.16744e-10	6.0514e-07
rs12652212	5	88808594	1	0.422028	0.00069816	0.255264	0.320781	4.60447e-07	0.0012277
rs6882366	5	95864693	1	0.401789	0.098838	0.155708	0.343555	4.03356e-07	0.000110246
rs6888194	5	106910657	1	0.626348	0.269482	0.0834256	0.0207289	2.63051e-08	1.53736e-05
rs40067	5	107439012	1	0.836991	0.100194	0.0496035	0.0131987	2.52612e-08	1.36189e-05
rs459552	5	112176756	1	0.796856	0.150936	0.0513634	0.000842587	4.13226e-10	2.49763e-06
rs6864049	5	124330522	1	0.959018	0.0040948	0.0149084	0.0219673	2.66517e-08	1.11461e-05
rs6886072	5	136598460	1	0.986083	0.00189949	0.0115619	0.000455558	1.60325e-10	5.80576e-07
rs17405603	5	144608340	1	0.89591	0.0110346	0.0929231	0.000130847	1.88794e-10	1.24188e-06
rs2053682	5	170599327	1	0.81807	0.0182701	0.160098	0.00355532	1.02281e-08	5.94252e-06
rs2228213	6	12124855	1	0.477071	0.32679	0.0445419	0.151583	1.97232e-07	1.41699e-05
rs11757278	6	13180454	1	0.606679	0.353731	0.0302274	0.00936121	2.87425e-09	1.98819e-06
rs2066295	6	26168903	1	0.925151	0.00882975	0.0641699	0.00184593	7.32601e-08	3.37577e-06
rs2281819	6	33771673	1	0.97707	0.0097081	0.0128676	0.000354303	4.45134e-10	2.48838e-07
rs6915002	6	54028069	1	0.738439	0.0379536	0.218671	0.00488411	3.07872e-08	5.25597e-05
rs1293037	6	70248345	1	0.752018	0.226127	0.0202512	0.00160207	2.70263e-10	1.38895e-06
rs6921533	6	73742334	1	0.889523	0.101105	0.00616216	0.00320897	7.14633e-10	8.34575e-07
rs9294260	6	83433228	1	0.77177	0.206533	0.0195898	0.00210586	2.43961e-10	1.16772e-06
rs6909685	6	97753952	1	0.933097	0.0516626	0.0149203	0.00032013	6.4108e-11	2.98163e-07
rs9320823	6	98429337	1	0.949197	0.0399637	0.00740742	0.00343025	4.24768e-09	1.96268e-06
rs156201	6	104847441	1	0.898572	0.00795524	0.0857493	0.00771232	3.3433e-08	1.0781e-05
rs2246012	6	131898208	1	0.47962	0.244633	0.274899	0.0008426	6.84208e-10	5.59645e-06
rs7760482	6	147354276	1	0.931858	0.0414392	0.0255184	0.00118018	1.34824e-10	4.31859e-06
rs12527426	6	153392002	1	0.870375	0.00386419	0.125188	0.000567059	1.07582e-09	5.58065e-06
rs9478496	6	154333183	1	0.917146	0.0216377	0.0606816	0.000533354	4.33211e-10	1.33957e-06
rs13191362	6	163033350	1	0.484517	0.383636	0.126692	0.00512151	6.60567e-10	3.25461e-05
rs6950388	7	1270699	1	0.42502	0.30218	0.246233	0.0264412	3.46368e-08	0.000125849
rs4721089	7	1872921	1	0.917899	0.0648618	0.0141738	0.00306408	7.27089e-09	1.62796e-06
rs6463489	7	5542513	1	0.929294	0.0590952	0.0112065	0.000403989	7.08892e-11	4.06161e-07
rs4307239	7	24354300	1	0.632353	0.182046	0.163953	0.0216236	2.67632e-08	2.38673e-05
rs215669	7	32378979	1	0.96768	0.00180167	0.026638	0.00387757	4.29e-09	2.60015e-06
rs2289379	7	44804225	1	0.946632	0.0096372	0.0326232	0.011097	3.42123e-08	1.0876e-05
rs17207196	7	75101065	1	0.951599	0.0177415	0.0273554	0.00329934	8.68963e-09	5.04778e-06
rs13240600	7	99064466	1	0.973115	0.00919478	0.0151066	0.00258148	1.00012e-09	1.81698e-06
rs1721447	7	109214139	1	0.796077	0.113781	0.089559	0.000580531	2.03714e-09	2.75678e-06
rs2396625	7	113028634	1	0.921358	0.0673079	0.0106208	0.000712766	4.13517e-10	8.38663e-07
rs13245051	7	113362799	1	0.959571	0.00219405	0.0376984	0.00053511	8.32012e-10	1.86305e-06
rs7802342	7	137435925	1	0.585211	0.0616481	0.342327	0.0107431	3.34631e-09	7.06597e-05
rs10110189	8	15393380	1	0.929186	0.00329494	0.0589077	0.00858605	2.33947e-08	2.49212e-05
rs73225274	8	21088909	1	0.839123	0.145029	0.0142723	0.00157478	7.09307e-09	1.04081e-06
rs1421334	8	30865733	1	0.964605	0.0304023	0.00465091	0.000341259	1.33666e-10	3.19307e-07
rs12386885	8	87766769	1	0.793549	0.0112123	0.190953	0.00424077	2.17762e-08	4.46049e-05
rs2120710	8	93210803	1	0.681613	0.0295734	0.285433	0.00337338	1.75796e-08	7.97963e-06
rs1383592	8	106430676	1	0.831029	0.0511129	0.117566	0.000290718	1.43568e-10	1.64314e-06
rs72673947	8	118884379	1	0.581147	0.364982	0.0531122	0.000756132	3.34659e-10	2.07177e-06
rs6470144	8	124152245	1	0.886297	0.0297298	0.0819777	0.00199265	5.29623e-08	2.90365e-06
rs305256	8	137568252	1	0.736465	0.0222474	0.238013	0.00326289	3.82507e-08	1.17891e-05
rs11782074	8	142617096	1	0.935975	0.0274344	0.0348873	0.00169961	1.14085e-09	3.68272e-06
rs10099330	8	143383694	1	0.801164	0.0440381	0.125091	0.029681	1.08115e-07	2.58131e-05
rs1948080	9	11852043	1	0.966697	0.0162378	0.0165016	0.000562877	1.07575e-10	4.74388e-07
rs10961649	9	14670949	1	0.972575	0.0126167	0.0134445	0.00136254	3.33548e-10	1.56625e-06
rs10962550	9	16720329	1	0.991416	0.00234706	0.00601721	0.000219575	1.53179e-10	2.67067e-07
rs10121187	9	29737191	1	0.977101	0.011401	0.0109863	0.000511707	1.50976e-10	3.37736e-07
rs7357754	9	92207308	1	0.824736	0.0491177	0.125619	0.000522874	8.94817e-10	4.46786e-06
rs7025938	9	103088321	1	0.841463	0.120614	0.0360224	0.00189939	5.40936e-09	1.25494e-06
rs1928295	9	120378483	1	0.978585	0.00147893	0.0146052	0.00532798	2.5834e-08	2.51871e-06
rs13298487	9	126112104	1	0.829801	0.0502412	0.118835	0.00111695	2.59995e-10	5.93183e-06
rs4740383	9	133783566	1	0.917679	0.0749408	0.00705323	0.000326906	3.91005e-11	2.34503e-07
rs7907470	10	10268989	1	0.854374	0.0577689	0.0844115	0.00344245	5.98023e-09	3.27028e-06
rs7893571	10	16750129	1	0.519823	0.43356	0.0457156	0.000899969	2.57952e-10	1.27531e-06
rs7084454	10	21821274	1	0.90651	0.030473	0.0465051	0.0165007	8.71095e-08	1.11033e-05
rs4097319	10	33860515	1	0.432622	0.422313	0.0658654	0.0791131	2.39155e-08	8.66616e-05
rs12765914	10	34013507	1	0.956531	0.0128816	0.0303152	0.000271434	7.72547e-11	7.23107e-07
rs12259464	10	53680099	1	0.850487	0.00289873	0.145674	0.000936379	9.51627e-09	4.05416e-06
rs7070670	10	61842645	1	0.942168	0.0182876	0.024523	0.0150152	7.24084e-09	6.40088e-06
rs12098284	10	76047464	1	0.853221	0.140764	0.00458898	0.00142602	7.17607e-10	3.73197e-07
rs11001259	10	76807650	1	0.771737	0.194308	0.0323111	0.0016406	4.90982e-09	3.167e-06
rs10788494	10	88110925	1	0.826739	0.164054	0.00879896	0.000407926	4.3589e-11	2.51095e-07
rs2439823	10	99778226	1	0.825515	0.0107475	0.163479	0.000254647	1.49965e-09	3.16894e-06
rs17094222	10	102395440	1	0.730828	0.235301	0.0220755	0.0117925	2.00736e-09	2.20694e-06
rs2257791	10	118643670	1	0.985889	0.00969711	0.00416483	0.000248791	1.22853e-10	1.42149e-07
rs17636031	10	126594078	1	0.359996	0.292802	0.177509	0.169521	8.25257e-07	0.000171069
rs4880341	10	133992689	1	0.626029	0.207637	0.156746	0.00957706	2.00265e-08	1.13877e-05
rs12421848	11	891338	1	0.950289	0.0117199	0.033167	0.00481	2.13562e-08	1.3884e-05
rs6265	11	27679916	1	0.974583	0.00377568	0.0192421	0.00239843	2.3645e-09	9.18135e-07
rs11030618	11	29243293	1	0.868521	0.0030372	0.0634445	0.0649065	1.56683e-08	9.10686e-05
rs2862996	11	43653833	1	0.497689	0.47171	0.0301833	0.000416428	2.62471e-10	4.99114e-07
rs118081010	11	46174948	1	0.85661	0.116274	0.0194473	0.00766646	1.60896e-08	2.36072e-06
rs6591407	11	56914157	1	0.99087	0.00195708	0.00682321	0.000349895	1.52444e-10	3.10283e-07
rs7102454	11	65594820	1	0.895919	0.0147607	0.0499436	0.0393628	5.37487e-07	1.30251e-05
rs12282785	11	76476030	1	0.941175	0.0330292	0.0222888	0.00350047	1.96852e-09	6.9317e-06
rs349088	11	84814393	1	0.593548	0.39478	0.0100062	0.00166499	1.19696e-10	7.44975e-07
rs10741329	11	89997796	1	0.948097	0.024622	0.0256964	0.00158343	1.23952e-09	7.01188e-07
rs3019466	11	92476178	1	0.947129	0.00695645	0.0420752	0.00383198	3.85427e-09	7.30103e-06
rs12286929	11	115022404	1	0.73402	0.0673455	0.197272	0.00135621	2.62516e-10	5.78157e-06
rs3825061	11	118944675	1	0.787308	0.0676077	0.144325	0.000755087	1.21088e-10	4.1977e-06
rs11218510	11	121922587	1	0.734967	0.248986	0.00630139	0.00974391	1.1164e-09	1.51341e-06
rs7944782	11	130795698	1	0.904472	0.0508193	0.0376758	0.00702623	4.01301e-08	6.51348e-06
rs2007518	11	132639606	1	0.972051	0.0227886	0.00365661	0.00150298	2.0334e-10	4.06801e-07
rs1941213	11	133125329	1	0.966796	0.00332422	0.0205775	0.00929937	1.3733e-08	3.15586e-06
rs12364470	11	134601012	1	0.564423	0.426636	0.00783792	0.00110286	3.69447e-10	4.38307e-07
rs11044430	12	19287416	1	0.953483	0.0250464	0.0201366	0.00133339	1.69619e-10	8.31675e-07
rs11046972	12	23705969	1	0.788761	0.0514965	0.0398458	0.119878	2.50133e-08	1.8612e-05
rs10842240	12	24060075	1	0.930126	0.0138982	0.0542431	0.00173055	4.06175e-10	1.92445e-06
rs2271189	12	56494991	1	0.97405	0.00736052	0.0179129	0.000674264	6.94941e-10	2.1063e-06
rs7975187	12	60964108	1	0.863971	0.100223	0.0203215	0.0154784	6.16183e-09	5.4331e-06
rs650198	12	69674595	1	0.887171	0.0153127	0.0962843	0.00122642	4.67233e-10	5.53622e-06
rs11115176	12	82465797	1	0.931682	0.0584812	0.00705566	0.00277926	1.72495e-10	1.69907e-06
rs2712665	12	99594947	1	0.928123	0.0248457	0.0442054	0.00281447	2.13881e-08	1.11578e-05
rs1860561	12	110783241	1	0.921795	0.00376058	0.071002	0.00343696	1.0452e-08	5.74682e-06
rs2707183	12	116957607	1	0.926123	0.00261815	0.0691135	0.00213642	3.6665e-09	9.06512e-06
rs11614340	12	133426483	1	0.625106	0.295621	0.0695483	0.00971623	6.70168e-09	8.21283e-06
rs7323	13	28009031	1	0.504357	0.306185	0.179895	0.00955451	4.94361e-08	8.65261e-06
rs9595908	13	33184288	1	0.851151	0.136153	0.00770962	0.00498514	4.3672e-09	1.10538e-06
rs962796	13	54385284	1	0.99202	0.00507551	0.00240912	0.000495163	3.43986e-10	2.14694e-07
rs8181823	13	65477940	1	0.923468	0.0223351	0.0539793	0.000215754	7.75451e-11	1.74796e-06
rs1441264	13	79580919	1	0.729013	0.261904	0.00677457	0.00230802	3.70174e-10	3.62671e-07
rs77432547	13	86494817	1	0.925116	0.067828	0.00682474	0.000230623	5.47743e-11	1.29378e-07
rs9168	13	99101583	1	0.942831	0.0465697	0.00980951	0.000789364	1.40416e-09	9.28126e-07
rs9888533	13	107854612	1	0.917701	0.0678136	0.014256	0.000229382	2.13232e-11	4.06281e-07
rs9522183	13	111977280	1	0.907721	0.0633861	0.0281971	0.000695145	1.24657e-09	1.0973e-06
rs12868881	13	112218924	1	0.980195	0.01145	0.0080427	0.000312104	1.62215e-10	3.14508e-07
rs4981693	14	29680331	1	0.924211	0.0425092	0.0290991	0.00417872	7.46671e-09	2.24654e-06
rs1958898	14	40886886	1	0.947726	0.0213475	0.0290515	0.00187294	8.25589e-09	1.69344e-06
rs4900714	14	47302219	1	0.980005	0.0166498	0.00292878	0.000415956	8.43791e-11	2.10648e-07
rs217669	14	62360075	1	0.869339	0.0922912	0.0375447	0.000823994	3.74199e-09	1.24732e-06
rs4430672	14	63094407	1	0.92276	0.0647775	0.00803424	0.00442757	5.4776e-09	1.10368e-06
rs3902951	14	69789755	1	0.760084	0.154045	0.0701273	0.0157356	5.59058e-08	7.80532e-06
rs17182027	14	73348130	1	0.97657	0.0144032	0.00558808	0.00343631	1.77441e-09	2.59155e-06
rs4517716	14	83013876	1	0.562506	0.311109	0.121771	0.00461099	4.47945e-09	2.75301e-06
rs942066	14	94031914	1	0.933039	0.0513955	0.0147981	0.000767008	3.07128e-10	3.71795e-07
rs4906263	14	103249127	1	0.757884	0.0964145	0.143294	0.00240184	1.54829e-09	5.35496e-06
rs7172627	15	31877690	1	0.951204	0.0126763	0.0350949	0.00102222	1.51199e-09	2.38975e-06
rs11636611	15	36391965	1	0.943102	0.0229526	0.0316266	0.00231611	2.31529e-10	2.17984e-06
rs9944219	15	46500612	1	0.946304	0.0443399	0.00805852	0.00129702	4.02015e-10	3.1786e-07
rs2241423	15	68086838	1	0.636926	0.335989	0.0161568	0.0109267	3.20113e-09	1.1859e-06
rs56151256	15	78024806	1	0.967597	0.001186	0.0295346	0.0016784	3.30116e-09	3.9571e-06
rs12914623	15	80993570	1	0.924636	0.0660757	0.00440387	0.00488401	1.33375e-09	7.78337e-07
rs72757415	15	92572762	1	0.893906	0.0986254	0.00698385	0.000484113	1.28873e-10	2.39054e-07
rs11633626	15	95271378	1	0.950253	0.0130511	0.0353531	0.0013401	1.568e-10	2.37519e-06
rs214249	16	348687	1	0.920641	0.07319	0.00513652	0.00103194	3.38849e-10	4.63013e-07
rs879620	16	4015729	1	0.941377	0.0151685	0.0377352	0.00571601	4.23768e-08	3.33094e-06
rs7498665	16	28883241	1	0.850761	0.141394	0.00475211	0.00309263	1.40097e-09	3.87269e-07
rs3814883	16	29994922	1	0.692973	0.229742	0.0766263	0.000655873	7.13852e-11	2.62134e-06
rs8057911	16	54143352	1	0.790998	0.0158505	0.157075	0.036019	1.91901e-07	5.67769e-05
rs889398	16	69556715	1	0.944173	0.0223402	0.0331537	0.000332369	4.91266e-11	8.76837e-07
rs7206608	16	82872628	1	0.772139	0.221682	0.00557476	0.000604455	5.6269e-11	3.62905e-07
rs3923783	17	1843189	1	0.975457	0.0173744	0.00594263	0.00122526	3.77198e-09	5.42685e-07
rs7774	17	4801163	1	0.889294	0.0953607	0.0129609	0.00238314	4.62628e-09	1.72851e-06
rs8065172	17	31456969	1	0.67168	0.250137	0.077428	0.000753779	5.6717e-10	9.55513e-07
rs12150665	17	34914787	1	0.86918	0.123493	0.00546545	0.0018613	9.47249e-11	4.65235e-07
rs11655587	17	47140794	1	0.950351	0.0344567	0.0132558	0.00193571	1.18524e-09	1.27373e-06
rs11649864	17	56093061	1	0.840381	0.141837	0.00799122	0.00978948	1.19646e-09	1.26685e-06
rs12602912	17	65870073	1	0.640133	0.114088	0.244492	0.00128203	7.43534e-10	4.5319e-06
rs8097672	18	1839601	1	0.567941	0.1057	0.0569739	0.269331	1.42944e-07	5.39824e-05
rs891387	18	21103909	1	0.94905	0.0160973	0.0346236	0.000227746	2.61849e-10	1.25046e-06
rs1941696	18	31252129	1	0.40191	0.377241	0.219927	0.000914865	3.64425e-10	6.89516e-06
rs2612576	18	42967950	1	0.971736	0.0159433	0.0118771	0.000442527	6.33314e-11	7.03714e-07
rs6567160	18	57829135	1	0.473881	0.428909	0.0959523	0.00125604	1.68008e-10	1.79802e-06
rs17066856	18	58049656	1	0.925584	0.0503542	0.0234147	0.000646703	2.54693e-10	3.55394e-07
rs66595146	18	58204315	1	0.801158	0.0748904	0.123116	0.000832635	5.54617e-10	2.86182e-06
rs12981256	19	1865901	1	0.644021	0.337111	0.0165504	0.00231653	1.11724e-09	9.58209e-07
rs895330	19	4060707	1	0.961479	0.0170005	0.0209488	0.000570895	1.53347e-09	9.28451e-07
rs17724992	19	18454825	1	0.92102	0.0203206	0.0119424	0.0467042	3.49285e-08	1.22698e-05
rs7258722	19	18808915	1	0.969378	0.0254929	0.00490553	0.00022305	6.43474e-11	1.63034e-07
rs12462975	19	30272202	1	0.832427	0.129803	0.0319314	0.00583554	6.44927e-09	3.36363e-06
rs185350	19	34306816	1	0.637414	0.332703	0.0114918	0.0183875	9.72962e-10	3.80155e-06
rs9304665	19	47602577	1	0.82324	0.0588496	0.117172	0.000735794	4.34681e-10	2.88385e-06
rs1884389	20	1410582	1	0.780826	0.0168074	0.199778	0.00257383	8.84233e-10	1.39524e-05
rs8122855	20	25192049	1	0.634125	0.355225	0.00790368	0.00274511	7.78877e-10	8.76681e-07
rs17806224	20	51065854	1	0.743321	0.236443	0.0191438	0.00109135	4.10638e-11	1.02774e-06
rs2832283	21	30690558	1	0.899176	0.0331369	0.0412047	0.0264604	5.02509e-08	2.18973e-05
rs8126575	21	46435610	1	0.891564	0.0928184	0.0151547	0.000461568	1.54067e-10	8.09941e-07
rs427943	21	46570896	1	0.991828	0.00283429	0.00520138	0.000136423	1.11796e-10	1.57552e-07
rs11538	22	18220831	1	0.73803	0.0541368	0.0450618	0.16275	7.29007e-07	2.08212e-05
rs9615337	22	48898559	1	0.647637	0.313723	0.0382024	0.000436565	2.93472e-10	9.64456e-07
rs61740466	1	19934900	2	0.0268788	0.538044	0.0855883	0.349389	6.00483e-08	9.96611e-05
rs4655141	1	23312025	2	0.00229165	0.674878	0.0477949	0.274912	9.83853e-07	0.000123364
rs587271	1	54743111	2	0.233651	0.535859	0.227178	0.00330382	1.21093e-09	7.45954e-06
rs3101336	1	72751185	2	0.00338834	0.795059	0.197538	0.00400028	9.49097e-09	1.43134e-05
rs321237	1	96478125	2	7.203e-05	0.673859	0.306869	0.0187091	1.78068e-08	0.000490832
rs17024393	1	110154688	2	0.440046	0.518531	0.0384039	0.00301716	1.11179e-09	1.35608e-06
rs61828641	1	174321997	2	0.156476	0.507588	0.329973	0.00595015	5.26862e-09	1.23504e-05
rs1006317	1	209552636	2	0.291164	0.521298	0.186629	0.000903117	6.13484e-10	6.38439e-06
rs6661316	1	210095527	2	0.000589479	0.968241	0.0217784	0.00936179	2.06596e-07	2.92109e-05
rs10168563	2	35552173	2	0.239604	0.610441	0.140578	0.00936347	5.07639e-09	1.25132e-05
rs3770890	2	36657992	2	0.266748	0.692989	0.0329217	0.00733622	3.27775e-08	5.14645e-06
rs7561278	2	48954905	2	0.0217386	0.600521	0.318644	0.0588428	2.9586e-07	0.000253479
rs930295	2	50233352	2	0.288822	0.587147	0.122856	0.00116888	2.18684e-10	5.82589e-06
rs4671328	2	58935282	2	0.156188	0.831551	0.0115428	0.000717505	2.05666e-10	7.16879e-07
rs2861685	2	67837553	2	0.382817	0.591642	0.00688677	0.0186522	1.02754e-08	2.29381e-06
rs12714199	2	86812549	2	0.00025579	0.936446	0.0617572	0.00150541	4.64609e-09	3.60635e-05
rs10197031	2	105454590	2	0.00265089	0.901747	0.0517501	0.0438119	2.95245e-07	4.00299e-05
rs13033310	2	133523605	2	0.2383	0.733619	0.0263024	0.00177747	5.15705e-10	1.26861e-06
rs1451077	2	147901207	2	0.0541052	0.914196	0.0312951	0.000401795	1.7283e-10	2.18178e-06
rs2119753	2	151224579	2	0.0084557	0.753828	0.190579	0.0470918	5.45151e-07	4.55531e-05
rs3764835	2	159519368	2	0.264394	0.687105	0.0451998	0.00329498	1.17884e-08	5.65243e-06
rs34234296	2	175166636	2	0.246704	0.691151	0.0610344	0.00110364	7.40775e-10	7.24919e-06
rs4482463	2	205375909	2	0.184433	0.692512	0.122556	0.00049552	4.11891e-10	2.44692e-06
rs2600226	3	12928762	2	0.0685414	0.903557	0.0247329	0.00316439	1.40878e-09	4.13099e-06
rs1048637	3	13358171	2	0.0212289	0.75686	0.0301002	0.191631	1.16748e-07	0.000179334
rs11921432	3	35117776	2	0.0443753	0.875546	0.0757613	0.00430738	8.38438e-10	9.77806e-06
rs28350	3	42418446	2	9.38457e-05	0.615362	0.0240238	0.360414	9.15523e-06	9.73759e-05
rs6445258	3	62112198	2	0.3235	0.616267	0.04684	0.0133813	6.89706e-10	1.20531e-05
rs925018	3	62713143	2	0.366189	0.573371	0.0432158	0.017221	4.71591e-09	4.15746e-06
rs11915371	3	70539559	2	0.307544	0.525968	0.164968	0.00151089	1.22816e-09	8.46727e-06
rs6808814	3	116852469	2	0.000526991	0.992934	0.00478297	0.00175409	1.73825e-09	2.40596e-06
rs7631156	3	131751628	2	0.122735	0.855353	0.020549	0.0013621	1.65593e-10	1.04653e-06
rs9826775	3	156295341	2	0.151411	0.839551	0.00683344	0.00220365	6.1019e-10	9.0152e-07
rs12635553	3	171113714	2	0.00421189	0.975336	0.0112162	0.00922547	2.89367e-09	1.0341e-05
rs10938397	4	45182527	2	0.0360553	0.951238	0.00549336	0.00721167	4.00212e-09	1.41379e-06
rs1492767	4	55221467	2	0.132605	0.770632	0.095106	0.00165132	4.76114e-09	5.29534e-06
rs4864201	4	130731284	2	0.294164	0.679924	0.023131	0.00278045	1.03756e-09	8.9212e-07
rs1296328	4	137083193	2	0.149143	0.834341	0.0141714	0.00234298	2.36127e-09	1.79925e-06
rs6850421	4	180187034	2	0.00196678	0.926801	0.0517824	0.0194292	2.55685e-08	2.04925e-05
rs10942267	5	80841914	2	0.0206362	0.469026	0.46534	0.0449108	2.27093e-06	8.52724e-05
rs2962334	5	86879056	2	0.00947887	0.865796	0.00452742	0.120179	2.41861e-07	1.82177e-05
rs1501673	5	87963600	2	0.00786623	0.944786	0.0370263	0.0103115	1.61919e-08	9.97648e-06
rs11739877	5	105876806	2	0.000659606	0.887255	0.0271433	0.0848637	7.85002e-08	7.87142e-05
rs6893539	5	122705737	2	0.292096	0.612324	0.0684106	0.0271394	1.66451e-08	2.98706e-05
rs2910026	5	152529936	2	0.0931801	0.861463	0.044435	0.000920141	2.00148e-09	1.81956e-06
rs4921301	5	159984492	2	0.0177808	0.953351	0.0201023	0.00875929	5.08867e-08	6.23321e-06
rs2861089	5	164557954	2	0.000991445	0.951122	0.0267139	0.0211204	2.9633e-08	5.22632e-05
rs3806114	6	20482335	2	0.0273148	0.489671	0.464889	0.0180683	2.46947e-07	5.657e-05
rs2206277	6	50798526	2	0.0596179	0.919746	0.00942421	0.0112095	1.34476e-09	1.96483e-06
rs1327259	6	51177811	2	0.0412711	0.924425	0.00518479	0.0291153	5.57907e-09	4.1183e-06
rs2622274	6	64240516	2	0.0433013	0.904352	0.0486555	0.0036775	7.6472e-11	1.36148e-05
rs2357760	6	120213880	2	0.0249258	0.961754	0.00912203	0.00419706	6.20071e-10	1.34585e-06
rs2875762	6	124925032	2	0.0296809	0.933808	0.0301715	0.00633452	1.98862e-09	5.30507e-06
rs1268065	6	126042783	2	0.000457846	0.896722	0.100175	0.00260922	1.4672e-09	3.60176e-05
rs765875	6	143185683	2	0.316579	0.432937	0.226669	0.0237893	1.51606e-06	2.41525e-05
rs213518	7	26941065	2	0.000814569	0.833998	0.122485	0.0426177	1.49598e-06	8.28884e-05
rs2108719	7	39481056	2	0.001487	0.764341	0.223002	0.0110772	4.07087e-09	9.23617e-05
rs10499694	7	50614173	2	0.0354194	0.945021	0.016648	0.00290965	4.40308e-10	1.70281e-06
rs1965529	7	77825707	2	0.00951392	0.95914	0.0282342	0.00310823	6.81114e-09	3.43919e-06
rs11773362	7	147668180	2	0.00165829	0.89349	0.102095	0.00274285	2.97503e-09	1.46375e-05
rs56211164	7	158016764	2	0.000240849	0.94354	0.0496789	0.00652218	6.23993e-08	1.82577e-05
rs1700082	8	4121727	2	0.00746519	0.959064	0.0327175	0.000750379	1.419e-10	2.77695e-06
rs13263601	8	14095900	2	0.326137	0.64659	0.0225595	0.0047107	9.57979e-10	3.16633e-06
rs10101364	8	20634888	2	0.41457	0.447185	0.137445	0.000797473	2.70473e-10	2.23667e-06
rs13249650	8	25664336	2	0.361345	0.441432	0.0167173	0.18049	2.91656e-08	1.49236e-05
rs2466103	8	32412304	2	0.059445	0.707118	0.0547515	0.178655	6.88877e-07	2.96936e-05
rs12681792	8	62054463	2	0.10572	0.881812	0.0106603	0.00180567	2.80004e-09	1.16185e-06
rs12334877	8	67194171	2	0.284104	0.602802	0.093255	0.0198071	7.8734e-09	3.14418e-05
rs1808629	8	73435964	2	0.0480187	0.905997	0.0450413	0.000940876	1.66126e-09	1.7113e-06
rs17405819	8	76806584	2	0.000756266	0.655634	0.0458149	0.296679	5.53119e-05	0.00106008
rs2196618	8	85089437	2	5.14887e-05	0.849136	0.0509011	0.0994317	3.14418e-07	0.000479728
rs7842934	8	132838921	2	0.172118	0.785989	0.0382193	0.00367076	5.92876e-10	2.38272e-06
rs16906838	8	138213836	2	0.000494777	0.825709	0.117465	0.0557207	2.2349e-06	0.000608483
rs10975933	9	6954557	2	0.00405481	0.981667	0.0054606	0.00881327	2.5285e-08	4.77308e-06
rs4740619	9	15634326	2	0.478895	0.483209	0.0190066	0.018887	5.91848e-08	3.02126e-06
rs1412235	9	28410996	2	0.452056	0.537235	0.00962535	0.00108306	9.49736e-11	5.4551e-07
rs2275003	9	34124860	2	0.000515005	0.982029	0.0133991	0.00402246	9.6538e-10	3.46388e-05
rs13296413	9	37258105	2	6.89524e-05	0.907209	0.00764352	0.0849575	1.47304e-07	0.000121273
rs2134858	9	73837155	2	0.212899	0.404789	0.0307435	0.351461	3.76877e-08	0.000107436
rs7861160	9	80799579	2	1.60486e-05	0.695111	0.0131095	0.29056	8.13701e-06	0.00119593
rs1999433	9	81371441	2	0.285298	0.628324	0.0779953	0.00836862	9.60159e-10	1.38137e-05
rs10992867	9	96461013	2	0.218254	0.758549	0.0169754	0.00621956	5.69829e-10	1.92991e-06
rs1877875	9	120664469	2	0.0807671	0.825945	0.0804767	0.0128006	3.05526e-08	1.03062e-05
rs2267958	9	131015279	2	0.254239	0.720759	0.0171371	0.0078611	3.49922e-09	4.41843e-06
rs76638898	10	21099584	2	0.252768	0.655609	0.0836658	0.0079489	1.05702e-08	8.49517e-06
rs7899106	10	87410904	2	0.0254742	0.938224	0.0220798	0.0142085	2.12358e-09	1.32963e-05
rs4256980	11	8673939	2	0.0333878	0.957529	0.00757611	0.0015061	1.39954e-10	1.01581e-06
rs900144	11	13294268	2	0.042622	0.893156	0.0613488	0.00285553	4.60846e-09	1.76055e-05
rs2065418	11	30422068	2	0.442082	0.473121	0.0786826	0.00610298	1.06895e-09	1.14563e-05
rs10742752	11	45438374	2	0.00418215	0.95881	0.02009	0.0169047	3.44701e-09	1.27877e-05
rs562664	11	63823619	2	0.000349706	0.707076	0.153774	0.13774	0.000109663	0.00095073
rs2513999	11	103019633	2	0.162952	0.776193	0.0537771	0.00706187	1.59903e-09	1.59752e-05
rs329651	11	133767622	2	0.0983386	0.857698	0.0150232	0.0289283	1.05681e-07	1.1778e-05
rs11611246	12	939480	2	0.0127614	0.494119	0.456083	0.0369589	1.12991e-07	7.69948e-05
rs765125	12	2156207	2	0.1442	0.732672	0.121877	0.00124807	3.02482e-09	3.7329e-06
rs1350430	12	41819215	2	0.000213342	0.812639	0.0856946	0.101307	7.896e-08	0.000145725
rs7138803	12	50247468	2	0.0118848	0.908845	0.0726276	0.00663581	1.40165e-08	7.11113e-06
rs6539064	12	103706754	2	0.0403528	0.951884	0.00457043	0.00319165	9.91337e-10	1.12721e-06
rs11060853	12	123424071	2	0.0533998	0.895143	0.0380755	0.0133559	1.22068e-07	2.50862e-05
rs9603697	13	40783323	2	0.141046	0.804355	0.0471422	0.0074535	3.88593e-09	3.06154e-06
rs12429545	13	54102206	2	0.0166528	0.921738	0.0172649	0.0443359	4.58684e-08	8.03337e-06
rs9569777	13	58484786	2	0.329046	0.5597	0.109878	0.00136915	1.82818e-10	7.40618e-06
rs9527895	13	59367767	2	0.053639	0.639483	0.148349	0.158401	6.28822e-06	0.000120677
rs9599161	13	67434016	2	0.000955168	0.902075	0.0954034	0.00154852	2.85256e-09	1.83302e-05
rs10132280	14	25928179	2	0.0520694	0.928915	0.0159548	0.00305928	1.9553e-10	1.88655e-06
rs61983990	14	41475003	2	0.351003	0.542113	0.0952703	0.011601	4.38668e-07	1.20994e-05
rs7144011	14	79940383	2	0.00531656	0.988767	0.00502572	0.000890197	2.10076e-10	9.47402e-07
rs12888545	14	88308044	2	0.12377	0.839882	0.016302	0.0200413	4.65258e-09	4.64665e-06
rs7161194	14	101529005	2	0.235583	0.460104	0.300663	0.0036388	7.71576e-10	1.12829e-05
rs10145749	14	102782109	2	0.112222	0.733088	0.104145	0.050502	2.81181e-08	4.34288e-05
rs12594043	15	27034988	2	0.000474656	0.862778	0.103601	0.0330952	8.67979e-07	5.0593e-05
rs12912198	15	47103953	2	0.0156562	0.965228	0.0171381	0.00197439	4.96052e-10	3.46975e-06
rs6493498	15	51754451	2	0.0701666	0.895861	0.0313538	0.00261454	4.33122e-10	3.8004e-06
rs10518694	15	53072673	2	0.0842319	0.902187	0.00636778	0.00721088	3.42719e-10	2.30454e-06
rs1559673	15	62156514	2	0.0509623	0.917657	0.0305041	0.000872685	2.73017e-10	3.76505e-06
rs1477199	16	53712135	2	0.127824	0.814724	0.0108178	0.0466277	1.2292e-07	6.28949e-06
rs7206790	16	53797908	2	0.0167317	0.971375	0.00586036	0.00603132	6.01589e-10	1.60588e-06
rs35949039	16	70572605	2	0.208528	0.709483	0.0603851	0.021557	6.33274e-09	4.73109e-05
rs756717	16	72996162	2	0.00480109	0.975438	0.0190425	0.000715963	1.55057e-09	2.409e-06
rs12922346	16	82438337	2	0.000393574	0.97183	0.0178851	0.00988169	2.32425e-08	9.19462e-06
rs4986044	17	21261560	2	0.331939	0.648027	0.0175072	0.00252519	1.788e-10	1.42785e-06
rs6607337	17	35057373	2	0.0705432	0.879303	0.0441007	0.00604754	7.25544e-10	5.45363e-06
rs12939549	17	78611724	2	0.365415	0.622672	0.0112848	0.000627858	2.65421e-10	3.73825e-07
rs478707	18	7543207	2	0.000512834	0.624411	0.37113	0.00376903	9.50138e-08	0.0001769
rs1945160	18	22164216	2	0.0147585	0.92532	0.0373885	0.0224656	6.05507e-07	6.68502e-05
rs1356506	18	40708038	2	0.155714	0.647726	0.192702	0.00384902	4.43398e-09	8.27406e-06
rs9951619	18	56882326	2	0.0064263	0.952512	0.0282784	0.012767	5.09972e-09	1.58412e-05
rs17783165	18	63461638	2	0.208058	0.778879	0.0105164	0.00254472	8.87362e-11	1.60857e-06
rs11150911	18	73498528	2	9.61442e-05	0.816478	0.0221883	0.161059	4.7202e-08	0.000178409
rs273512	19	18224729	2	0.0658604	0.649407	0.0553373	0.229348	1.23052e-06	4.5906e-05
rs7245985	19	30710410	2	0.155748	0.700087	0.12793	0.0161722	2.12292e-08	6.25695e-05
rs2423668	20	12430673	2	0.00904644	0.936884	0.0298	0.0242328	7.96053e-09	3.62562e-05
rs1409818	20	21381121	2	0.00120784	0.727047	0.177046	0.0921737	4.67268e-06	0.00252108
rs2064044	21	22119890	2	0.0089591	0.945808	0.0429528	0.00227499	2.49339e-10	5.56184e-06
rs8134638	21	40644170	2	0.00285649	0.797875	0.195096	0.00408968	2.92793e-08	8.33075e-05
rs28489620	22	41804716	2	0.000497113	0.973225	0.0240831	0.00217622	1.57196e-08	1.88041e-05
rs112646560	1	39560250	3	0.00660332	0.0298344	0.962993	0.000421663	9.55873e-10	0.000148044
rs1750307	1	156488420	3	0.249715	0.0869775	0.640503	0.022754	5.05332e-07	4.98552e-05
rs10733051	1	167280354	3	0.271205	0.00984146	0.677256	0.0416197	2.24491e-07	7.76529e-05
rs10864728	1	230304914	3	1.53364e-06	9.61296e-06	0.997977	8.56041e-05	1.02095e-07	0.00192602
rs6710091	2	239597	3	1.9915e-05	1.2637e-06	0.997012	0.000662206	3.53782e-07	0.00230445
rs10182181	2	25150296	3	0.118835	0.111036	0.646967	0.123091	4.29551e-06	6.71795e-05
rs56133507	2	172818467	3	0.321439	0.0653098	0.583035	0.029681	2.72562e-06	0.000532392
rs6716898	2	198944271	3	5.32781e-06	9.25997e-05	0.991824	0.00217414	6.94103e-08	0.00590373
rs7593917	2	203931012	3	0.000796582	0.00340184	0.908364	0.0869731	4.68189e-06	0.000459732
rs10510419	3	12426936	3	0.217608	0.101713	0.637216	0.0433688	6.73526e-06	8.67096e-05
rs1799923	3	42306294	3	0.326455	0.227002	0.435252	0.0112766	1.15366e-08	1.44523e-05
rs687339	3	135932359	3	0.115962	0.0857112	0.797604	0.000639348	3.48931e-10	8.33995e-05
rs865809	3	183997735	3	0.00012104	0.0654382	0.933301	0.000539587	2.22954e-08	0.000599945
rs7616009	3	194881756	3	0.000275418	0.0143563	0.981449	0.00369858	9.73024e-07	0.000219598
rs6803161	3	196205694	3	0.0405443	0.000100965	0.957291	0.00191723	1.33938e-07	0.00014631
rs2271046	4	52752812	3	0.331964	0.283543	0.366683	0.0175206	4.63986e-08	0.000289504
rs2192158	4	55505360	3	0.0326791	0.0219431	0.944261	0.000921027	2.14045e-08	0.000195279
rs1346841	4	65651730	3	0.0162101	0.363703	0.606879	0.0131415	5.22379e-08	6.69914e-05
rs72649373	4	80609966	3	0.384195	0.00913994	0.602735	0.00390548	1.24117e-07	2.42739e-05
rs13107325	4	103188709	3	3.35956e-06	9.53955e-05	0.998016	0.000607046	2.27594e-06	0.00127614
rs7696649	4	120322177	3	9.18846e-06	7.42625e-06	0.986468	0.00193113	8.75498e-08	0.0115846
rs9992189	4	144060728	3	0.00113267	0.145943	0.428123	0.397862	1.63498e-06	0.0269378
rs3914628	4	147438019	3	0.433111	0.0225178	0.518604	0.0257312	1.44325e-07	3.63743e-05
rs750090	4	152931436	3	0.000687557	0.0413961	0.809938	0.147416	0.000145941	0.000416703
rs35408866	4	187743245	3	0.140578	0.0512755	0.806125	0.00200076	6.74806e-09	2.10932e-05
rs116374395	5	50723410	3	0.000714332	6.43611e-05	0.982694	0.0156704	0.00011929	0.000738116
rs1159692	5	63977815	3	0.14118	0.0799357	0.703714	0.0750003	6.03397e-07	0.000169371
rs7713317	5	95716722	3	0.307541	0.128404	0.323189	0.240795	2.89774e-06	6.75142e-05
rs13174863	5	139080745	3	0.00227099	0.301908	0.664505	0.0310044	4.0026e-05	0.000271205
rs7727781	5	165185571	3	0.0289142	0.0150236	0.50948	0.444694	7.67537e-07	0.00188767
rs2744974	6	34579431	3	0.00164196	0.00158504	0.969992	0.0257436	0.000120371	0.000916752
rs768023	6	108876002	3	0.0150662	0.0817599	0.881152	0.021942	8.86398e-08	7.97257e-05
rs9458814	6	163771305	3	0.00465325	0.0325994	0.961134	0.00156698	1.01021e-08	4.62622e-05
rs217433	7	44553496	3	2.41204e-06	0.0751287	0.900428	0.0204895	6.83211e-06	0.00394484
rs274628	7	86265855	3	0.000639591	0.015406	0.661332	0.319573	1.03862e-05	0.00303919
rs2283093	7	126721231	3	0.00422451	0.429475	0.563101	0.00315889	4.65296e-08	4.0037e-05
rs2907948	7	150638484	3	0.170728	0.00424954	0.824339	0.000615047	7.26541e-10	6.80459e-05
rs6468266	8	34380276	3	0.00684326	0.0578688	0.934679	0.000497154	1.70579e-09	0.000111359
rs12680842	8	95582606	3	0.0160974	8.47217e-05	0.957261	0.0260457	4.62981e-06	0.000506401
rs3808477	8	116670347	3	0.0476806	0.126587	0.662644	0.162532	3.23606e-05	0.000524144
rs7024334	9	109072075	3	0.333363	0.0008063	0.658893	0.00678986	1.05248e-07	0.000147601
rs10858334	9	137989785	3	0.125266	0.00291717	0.682748	0.188065	7.99479e-08	0.00100398
rs10829164	10	27318370	3	0.290545	0.0121496	0.694141	0.00313376	5.27583e-09	3.05681e-05
rs10761785	10	65318766	3	0.179804	0.00374821	0.813577	0.00247713	3.80668e-09	0.000393798
rs845084	10	125220036	3	0.000623117	0.461233	0.537056	0.00101801	2.80154e-08	7.03419e-05
rs11246136	11	371265	3	0.00940128	0.233199	0.756305	0.00098691	3.21835e-08	0.000107984
rs7124681	11	47529947	3	0.0182485	0.11054	0.870587	0.000593953	7.92675e-09	3.07478e-05
rs2605603	11	93221105	3	0.0378016	0.321166	0.439269	0.201439	3.35641e-07	0.000323193
rs10772983	12	17141582	3	0.203711	0.0352086	0.759561	0.00148733	3.54913e-09	3.19944e-05
rs1126930	12	49399132	3	8.67484e-06	0.00311172	0.883394	0.021412	4.87199e-05	0.0920246
rs11615578	12	121714935	3	0.0350065	0.277063	0.686059	0.00184166	1.9614e-08	2.99646e-05
rs9531786	13	85983968	3	0.416827	0.0139097	0.559981	0.0092124	6.56565e-08	6.94185e-05
rs1927790	13	96922191	3	0.000479669	0.074518	0.792681	0.131738	1.82002e-06	0.000580853
rs2273175	14	104160141	3	0.0456751	0.00139661	0.895634	0.0565752	3.65576e-07	0.000718659
rs12439632	15	59103963	3	6.126e-05	0.253123	0.698153	0.0448519	0.000282243	0.00352929
rs339991	15	60913637	3	0.00147127	0.355666	0.46667	0.172593	3.51587e-06	0.00359676
rs7171864	15	73227249	3	0.295359	0.277387	0.425816	0.00143233	5.99009e-09	6.00004e-06
rs6496248	15	98262923	3	7.33636e-07	1.17474e-06	0.997252	0.000662658	1.44624e-05	0.00206899
rs12591120	15	99236869	3	0.215223	0.0764065	0.707429	0.000926355	4.55533e-09	1.50671e-05
rs2715423	15	99511873	3	0.00564547	0.000836892	0.867886	0.117434	0.00223735	0.00596047
rs12448257	16	3599655	3	5.59985e-06	0.273011	0.709445	0.0151291	3.5408e-06	0.0024056
rs194809	16	23804956	3	7.88832e-06	0.0127607	0.986586	0.000266722	2.10502e-08	0.000379043
rs12926250	16	72213316	3	0.00880381	0.00273797	0.979692	0.00711436	1.69787e-07	0.00165168
rs4390583	16	81694835	3	0.000890207	0.00627672	0.992101	0.000652724	1.89878e-08	7.97842e-05
rs1075901	17	15943910	3	0.00029833	0.18348	0.779766	0.0352328	7.26026e-05	0.00115026
rs35867081	17	79047278	3	0.00477186	0.0207229	0.751685	0.222263	6.17306e-07	0.00055646
rs474605	18	39612720	3	0.430623	0.10259	0.458502	0.00826844	8.39716e-09	1.60754e-05
rs12611148	19	19865077	3	1.51158e-05	0.00838309	0.958283	0.0301603	1.90609e-06	0.00315633
rs3764625	19	49649051	3	0.0859123	0.305866	0.578763	0.0292374	1.94108e-07	0.000220938
rs4813619	20	2815715	3	0.102024	0.00141289	0.584799	0.311162	2.24991e-06	0.000600117
rs852056	20	17102860	3	0.385309	0.130617	0.472478	0.0115765	9.98495e-08	1.93327e-05
rs4812405	20	35276585	3	0.125894	0.0239566	0.846524	0.00307717	1.35601e-08	0.0005479
rs6010784	20	61540319	3	7.88902e-06	0.0139659	0.969673	0.015567	7.61903e-07	0.00078544
rs2238799	22	20109325	3	0.189429	0.11532	0.655211	0.0391339	7.58257e-09	0.000907068
rs12628051	22	40654276	3	0.000174249	0.100582	0.749967	0.147657	7.16771e-07	0.0016187
rs4653017	1	33776728	4	2.4233e-06	3.65778e-06	0.00557831	0.993004	5.21148e-05	0.00135959
rs6656785	1	75005776	4	0.00150356	0.000109393	0.420421	0.576263	6.18392e-05	0.00164165
rs34517439	1	78450517	4	0.00648942	0.00224269	0.131495	0.857904	0.00102088	0.000848609
rs74887628	1	147032779	4	8.99447e-06	0.00518647	0.00112386	0.993419	2.53312e-05	0.000235977
rs4970991	1	151004003	4	2.18813e-10	3.40037e-06	3.03957e-05	0.99639	0.00286877	0.000707907
rs11902450	2	12845368	4	0.000734042	0.000128378	0.0100832	0.988417	0.000154183	0.000482983
rs935166	2	26949366	4	0.000348275	0.00304145	0.00439146	0.992092	7.89024e-06	0.000119373
rs12987009	2	219658170	4	4.83892e-17	3.48392e-10	2.29905e-06	0.778948	0.149874	0.0711755
rs6783054	3	11672805	4	1.97578e-10	1.14459e-06	0.000693367	0.859994	0.136053	0.0032586
rs6804842	3	25106437	4	2.99784e-06	0.000676964	0.00411519	0.99485	9.09255e-06	0.000345664
rs11919665	3	48085349	4	1.44469e-10	2.99635e-09	0.00375348	0.771286	0.19612	0.0288401
rs9818122	3	85861064	4	0.0219345	0.0210714	0.196222	0.760502	7.79375e-06	0.000262291
rs2047648	3	157033438	4	2.05504e-07	2.06294e-05	0.00357139	0.992042	0.000837594	0.0035278
rs3732927	3	170586057	4	7.74212e-07	2.60132e-06	0.0397578	0.922677	0.0235032	0.0140591
rs9816226	3	185834499	4	1.19042e-10	6.23415e-05	0.000652821	0.993221	0.000145756	0.00591784
rs337637	4	38604470	4	8.0966e-10	3.78298e-06	4.23367e-05	0.997896	0.0017248	0.000332637
rs4148155	4	89054667	4	7.43562e-05	0.00698445	0.00114584	0.991622	3.51289e-06	0.000169835
rs7678054	4	95093855	4	7.04869e-05	0.402931	0.0519358	0.542626	1.71585e-06	0.00243488
rs7715256	5	153537893	4	0.000331745	0.335007	0.00716868	0.657414	3.69912e-06	7.56332e-05
rs9370410	6	55171842	4	1.15143e-12	1.40849e-07	4.69996e-05	0.920932	0.0752981	0.00372239
rs6922607	6	142703483	4	1.67938e-08	5.60639e-07	0.00677398	0.964073	8.15525e-06	0.029144
rs11772246	7	71603692	4	0.0484541	0.016653	0.0112182	0.923353	4.62268e-06	0.00031736
rs10261050	7	114337652	4	0.0840402	0.0185985	0.0154647	0.881497	8.1785e-07	0.000398786
rs11525873	7	138817193	4	7.50198e-11	4.55707e-06	0.00306208	0.991674	0.00057693	0.00468276
rs4240673	8	10787612	4	4.85453e-10	2.1282e-06	0.000476153	0.95649	0.00289305	0.0401388
rs10811868	9	23199959	4	0.00115352	0.24291	0.00937623	0.746449	8.21278e-06	0.000102677
rs10968114	9	27800007	4	0.00435139	0.0339951	0.0426844	0.918707	9.56682e-06	0.000252283
rs2777768	9	84186734	4	0.0200368	0.00363065	0.0114725	0.964673	6.24564e-05	0.000124237
rs10733682	9	129460914	4	0.000746822	0.467595	0.00743648	0.524061	1.53592e-06	0.000159467
rs1624134	10	34834482	4	1.442e-05	0.134959	0.00630344	0.858153	3.88126e-07	0.000569797
rs147568678	10	93061851	4	0.38737	0.14873	0.074499	0.389257	1.35575e-06	0.000142985
rs79780963	10	104952499	4	3.56868e-12	1.09621e-08	0.0563412	0.557981	0.0835605	0.302118
rs570463	11	28739318	4	0.00379338	0.00543187	0.00413146	0.986447	2.52669e-06	0.000193377
rs592483	11	69445173	4	2.37098e-05	0.0814906	0.0044687	0.912888	2.40409e-06	0.00112637
rs76942203	11	116973247	4	3.16694e-08	4.73885e-06	0.000681203	0.997755	0.00053145	0.00102737
rs35483388	11	122545146	4	9.86995e-11	3.20868e-06	0.000208294	0.984461	0.00510307	0.0102241
rs11170468	12	39430048	4	7.643e-06	6.84104e-06	0.00351152	0.995211	9.14851e-06	0.00125374
rs10506971	12	89757937	4	0.0234146	0.00776881	0.0400756	0.928628	7.05652e-06	0.000105766
rs11105839	12	91237920	4	0.013331	0.293116	0.0823272	0.611106	6.96665e-06	0.000113477
rs9512648	13	27933910	4	2.86588e-06	0.00944008	0.00549327	0.982421	0.000104563	0.00253776
rs4771218	13	28655311	4	1.21337e-08	0.000161672	0.00279323	0.993399	0.000594057	0.00305154
rs225882	14	30480123	4	0.0439247	0.000348006	0.0533708	0.901936	2.50431e-05	0.000395583
rs2470893	15	75019449	4	8.474e-09	0.000127426	0.000301636	0.999004	1.17904e-05	0.000555028
rs2058527	16	6704749	4	3.56804e-05	0.0626157	0.00562969	0.931169	5.6212e-05	0.000493984
rs9926784	16	19941968	4	8.30043e-05	0.179909	0.279076	0.537533	8.47004e-07	0.0033983
rs2342892	16	24540806	4	5.20088e-05	0.000219838	0.00736303	0.989834	0.00032153	0.00220981
rs6500208	16	49011249	4	0.112065	0.258015	0.121858	0.507953	2.5406e-07	0.000108744
rs11078883	17	2138828	4	3.21593e-05	0.426886	0.0164367	0.55582	1.15883e-07	0.000825617
rs56161855	17	46288649	4	1.75266e-08	2.2501e-06	0.00321149	0.986026	0.0091622	0.00159799
rs9299	17	46669430	4	2.75606e-05	0.0041932	0.0652486	0.927688	2.17992e-06	0.00284081
rs45486197	19	2244849	4	9.74799e-05	0.241407	0.00251083	0.755812	4.37261e-06	0.000167817
rs429358	19	45411941	4	9.4046e-16	2.7151e-09	1.1775e-06	0.983689	0.00938004	0.00693023
rs11672660	19	46180184	4	6.93595e-08	0.000111477	0.00114721	0.997868	0.000500464	0.000372706
rs742748	20	39293397	4	0.000127809	0.000310338	0.0178981	0.977352	0.000583101	0.003729
rs79186842	20	47689036	4	1.03887e-05	0.0350648	0.0022582	0.962462	5.50914e-05	0.000149601
rs1304549	20	54378256	4	2.7037e-10	0.00023383	0.00073935	0.994041	0.00237139	0.00261452
rs13047416	21	40309436	4	0.000287181	0.1285	0.0216441	0.849124	2.24948e-06	0.000442561
rs12628891	22	38317137	4	5.04487e-08	5.56451e-05	0.000258681	0.998	0.00144227	0.000243838
rs10779751	1	11284336	5	8.61535e-19	1.21033e-14	4.24996e-07	0.00401547	0.994716	0.00126794
rs7534091	1	118864616	5	5.12622e-18	2.99381e-13	0.000203585	0.000514078	0.817429	0.181854
rs4865796	5	53272664	5	1.19971e-24	9.40517e-17	1.58477e-08	0.00574442	0.981213	0.013043
rs13186194	5	60795485	5	5.45639e-31	2.30005e-18	3.90265e-10	5.08498e-05	0.987015	0.012934
rs6556301	5	176527577	5	1.62694e-31	1.28271e-20	8.16199e-10	1.96456e-06	0.914493	0.0855052
rs1358980	6	43764551	5	9.7492e-31	2.87098e-21	8.49522e-12	3.59205e-06	0.999568	0.000428527
rs57989773	6	100629078	5	1.3752e-19	1.22722e-12	1.79011e-06	0.00202497	0.995658	0.00231487
rs9375702	6	130384187	5	9.74525e-27	1.24658e-17	8.23153e-10	2.79572e-05	0.998222	0.00175022
rs6973656	7	77422583	5	1.22762e-19	8.37955e-14	1.19782e-07	0.000371969	0.999224	0.000404281
rs2283006	7	93085722	5	2.29458e-26	2.32347e-19	5.60065e-10	5.35631e-05	0.999442	0.00050438
rs11594179	10	104392580	5	6.27975e-18	3.29844e-10	1.11906e-05	0.00764139	0.974714	0.0176329
rs7903146	10	114758349	5	3.02495e-23	1.01375e-16	5.53522e-07	0.000286686	0.969185	0.0305282
rs2074314	11	17411821	5	6.91914e-21	1.11007e-16	1.97356e-05	0.000435892	0.922837	0.0767079
rs11066188	12	112610714	5	1.72939e-24	2.49996e-15	4.78581e-08	0.00461072	0.973173	0.022216
rs12369179	12	122963550	5	4.18019e-20	2.53555e-12	8.21999e-08	0.01018	0.988518	0.00130209
rs1951455	14	91512339	5	5.07858e-26	3.26315e-18	1.89906e-09	6.61099e-06	0.999558	0.000435276
rs312750	17	68343539	5	1.54632e-25	1.36059e-18	5.3093e-10	1.49559e-05	0.999636	0.000348617
rs11882409	19	34019685	5	4.11405e-19	2.09045e-13	9.73936e-08	0.00207118	0.997619	0.000310218
rs1884897	20	6612832	5	3.24906e-20	3.20044e-14	1.86589e-06	0.000180758	0.992143	0.00767416
rs6512302	20	62691550	5	2.01475e-17	1.20505e-13	1.08431e-06	0.00542918	0.993257	0.00131272
rs7734385	5	158460212	6	2.11911e-13	4.08255e-07	0.000634927	0.156968	0.065987	0.77641
