# Supplementary material for: Noise-augmented directional clustering of genetic association data identifies distinct mechanisms underlying obesity
Source: PLoS Genet. 2022 Jan 27;18(1):e1009975. doi: 10.1371/journal.pgen.1009975 (PMC8794082; doi:10.1371/journal.pgen.1009975)
Supplement: S2 Table — (XLSX) [file pgen.1009975.s003.xlsx]

## Sheet: S2 Table
List of canonical pathways and gene ontology processes associated with the mapped genes for each cluster of BMI associated genetic variants. N_genes: number of genes associated with the gene set. N_overlap: number of overlapping genes. E_overlap: expected number of overlapping genes. p-value: p-value from the hypergemeometric test. p-value (adj): p-value adjusted for multiple testing. Genes: List…
Cluster	Category	Gene Set	N_genes	N_overlap	E_overlap	p-value	p-value (adj)	Genes
Cluster 1	Canonical_Pathways	REACTOME_MEIOTIC_SYNAPSIS	77	21	4.79892	5.60303e-09	1.23211e-05	SYCP1:LMNA:H2AFX:SYNE2:TERF2:HIST1H4B:HIST1H2AB:HIST1H4C:HIST1H2AC:HIST1H2BD:HIST1H4D:HIST1H2BF:HIST1H4E:HIST1H2BG:HIST1H4F:HIST1H4H:HIST1H2BJ:HIST1H2BK:SUN1:H2AFV:STAG3
Cluster 1	Canonical_Pathways	REACTOME_HOMOLOGY_DIRECTED_REPAIR	136	28	8.47602	1.70018e-08	1.44243e-05	KAT5:MUS81:H2AFX:RAD9B:POLE:PARP2:SLX1B:PPP4C:SLX1A:RPA1:RAD51C:PIAS4:SIRT6:UBA52:ATRIP:POLK:HIST1H4B:HIST1H4C:HIST1H2BD:HIST1H4D:HIST1H2BF:HIST1H4E:HIST1H2BG:HIST1H4F:HIST1H4H:HIST1H2BJ:HIST1H2BK:WRN
Cluster 1	Canonical_Pathways	REACTOME_DNA_DOUBLE_STRAND_BREAK_REPAIR	164	31	10.2211	2.47714e-08	1.44243e-05	KAT5:MUS81:H2AFX:RAD9B:POLE:PARP2:SLX1B:PPP4C:SLX1A:RPA1:RAD51C:KPNA2:PIAS4:SIRT6:UBA52:NHEJ1:ATRIP:POLK:HIST1H4B:HIST1H4C:HIST1H2BD:HIST1H4D:HIST1H2BF:HIST1H4E:HIST1H2BG:HIST1H4F:HIST1H4H:HIST1H2BJ:HIST1H2BK:POLM:WRN
Cluster 1	Canonical_Pathways	REACTOME_MEIOSIS	114	25	7.1049	2.62379e-08	1.44243e-05	SYCP1:LMNA:H2AFX:SYNE2:TERF2:RPA1:RAD51C:HIST1H4B:HIST1H2AB:HIST1H4C:HIST1H2AC:HIST1H2BD:HIST1H4D:HIST1H2BF:HIST1H4E:HIST1H2BG:HIST1H3E:HIST1H4F:HIST1H4H:HIST1H2BJ:HIST1H2BK:SUN1:H2AFV:STAG3:TEX15
Cluster 1	Canonical_Pathways	REACTOME_DNA_DAMAGE_TELOMERE_STRESS_INDUCED_SENESCENCE	78	20	4.86125	4.04531e-08	1.77913e-05	KAT5:H2AFX:TERF2:CCNE1:HIST1H4B:HIST1H2AB:HIST1H1C:HIST1H4C:HIST1H2AC:HIST1H1E:HIST1H2BD:HIST1H4D:HIST1H2BF:HIST1H4E:HIST1H2BG:HIST1H4F:HIST1H4H:HIST1H2BJ:HIST1H2BK:H2AFV
Cluster 1	Canonical_Pathways	REACTOME_DEPURINATION	54	16	3.36548	1.02618e-07	3.76096e-05	H2AFX:TERF2:HIST1H4B:HIST1H2AB:HIST1H4C:HIST1H2AC:HIST1H2BD:HIST1H4D:HIST1H2BF:HIST1H4E:HIST1H2BG:HIST1H4F:HIST1H4H:HIST1H2BJ:HIST1H2BK:H2AFV
Cluster 1	Canonical_Pathways	REACTOME_REPRODUCTION	140	27	8.72532	1.26973e-07	3.98877e-05	SYCP1:LMNA:CATSPER1:H2AFX:HVCN1:SYNE2:TERF2:RPA1:RAD51C:HIST1H4B:HIST1H2AB:HIST1H4C:HIST1H2AC:HIST1H2BD:HIST1H4D:HIST1H2BF:HIST1H4E:HIST1H2BG:HIST1H3E:HIST1H4F:HIST1H4H:HIST1H2BJ:HIST1H2BK:SUN1:H2AFV:STAG3:TEX15
Cluster 1	Canonical_Pathways	REACTOME_SIGNALING_BY_NOTCH	228	36	14.2098	2.33708e-07	6.42404e-05	MIB2:MOV10:PSEN2:H2AFX:ATP2A2:PSME1:PSME2:PSEN1:NUMB:SMAD3:ATP2A1:PSMB10:WWP2:PSMB6:PSMD12:SIRT6:UBA52:STAT1:DNER:KAT2B:MAML3:HIST1H4B:HIST1H2AB:HIST1H4C:HIST1H2AC:HIST1H2BD:HIST1H4D:HIST1H2BF:HIST1H4E:HIST1H2BG:HIST1H3E:HIST1H4F:HIST1H4H:HIST1H2BJ:HIST1H2BK:H2AFV
Cluster 1	Canonical_Pathways	REACTOME_TELOMERE_MAINTENANCE	80	19	4.98589	3.25405e-07	6.71055e-05	H2AFX:POLE:TERF2:RPA1:HIST1H4B:HIST1H2AB:HIST1H4C:HIST1H2AC:HIST1H2BD:HIST1H4D:HIST1H2BF:HIST1H4E:HIST1H2BG:HIST1H4F:HIST1H4H:HIST1H2BJ:HIST1H2BK:H2AFV:POLA1
Cluster 1	Canonical_Pathways	REACTOME_PRE_NOTCH_EXPRESSION_AND_PROCESSING	104	22	6.48166	3.46481e-07	6.71055e-05	MOV10:H2AFX:ATP2A2:ATP2A1:SIRT6:KAT2B:MAML3:HIST1H4B:HIST1H2AB:HIST1H4C:HIST1H2AC:HIST1H2BD:HIST1H4D:HIST1H2BF:HIST1H4E:HIST1H2BG:HIST1H3E:HIST1H4F:HIST1H4H:HIST1H2BJ:HIST1H2BK:H2AFV
Cluster 1	Canonical_Pathways	REACTOME_PROCESSING_OF_DNA_DOUBLE_STRAND_BREAK_ENDS	96	21	5.98307	3.51999e-07	6.71055e-05	KAT5:H2AFX:RAD9B:PPP4C:RPA1:PIAS4:SIRT6:UBA52:ATRIP:HIST1H4B:HIST1H4C:HIST1H2BD:HIST1H4D:HIST1H2BF:HIST1H4E:HIST1H2BG:HIST1H4F:HIST1H4H:HIST1H2BJ:HIST1H2BK:WRN
Cluster 1	Canonical_Pathways	REACTOME_CELLULAR_RESPONSES_TO_EXTERNAL_STIMULI	523	63	32.5953	3.66197e-07	6.71055e-05	MOV10:LAMTOR2:HIF1AN:HSPA12A:KAT5:CCS:NOX4:H2AFX:MDM2:ANAPC7:PGAM5:PSME1:PSME2:BAG5:MAPK3:MT2A:PSMB10:TERF2:RPA1:PSMB6:MINK1:NUP88:DYNLL2:PSMD12:TUBB6:UBA52:CCNE1:PSME4:ATG9A:TUBA4A:CHMP4B:MAP1LC3A:NCF4:GPX1:MAPKAPK3:CHMP2B:ANAPC4:NUP54:HIST1H4B:HIST1H2AB:HIST1H1C:HIST1H4C:HIST1H2AC:HIST1H1E:HIST1H2BD:HIST1H4D:HIST1H2BF:HIST1H4E:HIST1H2BG:HIST1H3E:HIST1H4F:HIST1H4H:HIST1H2BJ:HIST1H2BK:EEF1A1:PARK…
Cluster 1	Canonical_Pathways	REACTOME_DNA_REPAIR	327	45	20.3798	4.6759e-07	7.01501e-05	MAD2L2:POLR2L:DDB2:UBE2L6:KAT5:MUS81:H2AFX:RAD9B:POLE:PARP2:PIAS1:SLX1B:INO80E:PPP4C:SLX1A:FTO:TERF2:RPA1:RAD51C:KPNA2:PIAS4:SIRT6:ELL:UBA52:NHEJ1:ATRIP:UBA7:POLK:HIST1H4B:HIST1H2AB:HIST1H4C:HIST1H2AC:HIST1H2BD:HIST1H4D:HIST1H2BF:HIST1H4E:HIST1H2BG:HIST1H4F:HIST1H4H:HIST1H2BJ:HIST1H2BK:ACTB:POLM:H2AFV:WRN
Cluster 1	Canonical_Pathways	REACTOME_CELL_CYCLE	632	72	39.3886	4.7511e-07	7.01501e-05	CDK11B:SYCP1:LMNA:SDCCAG8:AKT3:WAPAL:KAT5:BANF1:H2AFX:MDM2:ANAPC7:RAD9B:PPP1CC:POLE:ANKLE2:PDS5B:PSME1:PSME2:SYNE2:LCMT1:MAPK3:RBL2:PSMB10:TERF2:RPA1:PSMB6:NUP88:MIS12:DYNLL2:RAD51C:PSMD12:TUBB6:PIAS4:UBA52:CCNE1:HAUS5:PSME4:MCM6:TUBA4A:GINS1:NINL:ATRIP:ANAPC4:NUP54:HIST1H4B:HIST1H2AB:HIST1H4C:HIST1H2AC:HIST1H2BD:HIST1H4D:HIST1H2BF:HIST1H4E:HIST1H2BG:HIST1H3E:HIST1H4F:HIST1H4H:HIST1H2BJ:HIST1H2BK…
Cluster 1	Canonical_Pathways	REACTOME_MEIOTIC_RECOMBINATION	82	19	5.11054	4.91236e-07	7.01501e-05	H2AFX:RPA1:RAD51C:HIST1H4B:HIST1H2AB:HIST1H4C:HIST1H2AC:HIST1H2BD:HIST1H4D:HIST1H2BF:HIST1H4E:HIST1H2BG:HIST1H3E:HIST1H4F:HIST1H4H:HIST1H2BJ:HIST1H2BK:H2AFV:TEX15
Cluster 1	Canonical_Pathways	REACTOME_DNA_METHYLATION	60	16	3.73942	5.10414e-07	7.01501e-05	H2AFX:HIST1H4B:HIST1H2AB:HIST1H4C:HIST1H2AC:HIST1H2BD:HIST1H4D:HIST1H2BF:HIST1H4E:HIST1H2BG:HIST1H3E:HIST1H4F:HIST1H4H:HIST1H2BJ:HIST1H2BK:H2AFV
Cluster 1	Canonical_Pathways	REACTOME_RUNX1_REGULATES_TRANSCRIPTION_OF_GENES_INVOLVED_IN_DIFFERENTIATION_OF_HSCS	124	24	7.72814	5.85158e-07	7.56919e-05	TAL1:H2AFX:PSME1:PSME2:PSMB10:PSMB6:PSMD12:UBA52:PSME4:HIST1H4B:HIST1H2AB:HIST1H4C:HIST1H2AC:HIST1H2BD:HIST1H4D:HIST1H2BF:HIST1H4E:HIST1H2BG:HIST1H3E:HIST1H4F:HIST1H4H:HIST1H2BJ:HIST1H2BK:H2AFV
Cluster 1	Canonical_Pathways	REACTOME_BASE_EXCISION_REPAIR_AP_SITE_FORMATION	61	16	3.80174	6.52202e-07	7.96773e-05	H2AFX:TERF2:HIST1H4B:HIST1H2AB:HIST1H4C:HIST1H2AC:HIST1H2BD:HIST1H4D:HIST1H2BF:HIST1H4E:HIST1H2BG:HIST1H4F:HIST1H4H:HIST1H2BJ:HIST1H2BK:H2AFV
Cluster 1	Canonical_Pathways	REACTOME_ACTIVATED_PKN1_STIMULATES_TRANSCRIPTION_OF_AR_ANDROGEN_RECEPTOR_REGULATED_GENES_KLK2_AND_KLK3	63	16	3.92639	1.04703e-06	0.00012118	H2AFX:HIST1H4B:HIST1H2AB:HIST1H4C:HIST1H2AC:HIST1H2BD:HIST1H4D:HIST1H2BF:HIST1H4E:HIST1H2BG:HIST1H3E:HIST1H4F:HIST1H4H:HIST1H2BJ:HIST1H2BK:H2AFV
Cluster 1	Canonical_Pathways	REACTOME_SIRT1_NEGATIVELY_REGULATES_RRNA_EXPRESSION	64	16	3.98872	1.31601e-06	0.000144695	H2AFX:HIST1H4B:HIST1H2AB:HIST1H4C:HIST1H2AC:HIST1H2BD:HIST1H4D:HIST1H2BF:HIST1H4E:HIST1H2BG:HIST1H3E:HIST1H4F:HIST1H4H:HIST1H2BJ:HIST1H2BK:H2AFV
Cluster 1	Canonical_Pathways	REACTOME_CELLULAR_RESPONSES_TO_STRESS	429	53	26.7369	1.43891e-06	0.000150675	MOV10:HIF1AN:HSPA12A:KAT5:CCS:NOX4:H2AFX:MDM2:ANAPC7:PSME1:PSME2:BAG5:MAPK3:PSMB10:TERF2:RPA1:PSMB6:MINK1:NUP88:DYNLL2:PSMD12:TUBB6:UBA52:CCNE1:PSME4:TUBA4A:NCF4:GPX1:MAPKAPK3:ANAPC4:NUP54:HIST1H4B:HIST1H2AB:HIST1H1C:HIST1H4C:HIST1H2AC:HIST1H1E:HIST1H2BD:HIST1H4D:HIST1H2BF:HIST1H4E:HIST1H2BG:HIST1H3E:HIST1H4F:HIST1H4H:HIST1H2BJ:HIST1H2BK:EEF1A1:CYCS:H2AFV:NCF1:POM121C:GSR
Cluster 1	Canonical_Pathways	REACTOME_BASE_EXCISION_REPAIR	89	19	5.54681	1.86203e-06	0.000186118	H2AFX:POLE:PARP2:TERF2:RPA1:HIST1H4B:HIST1H2AB:HIST1H4C:HIST1H2AC:HIST1H2BD:HIST1H4D:HIST1H2BF:HIST1H4E:HIST1H2BG:HIST1H4F:HIST1H4H:HIST1H2BJ:HIST1H2BK:H2AFV
Cluster 1	Canonical_Pathways	REACTOME_NONHOMOLOGOUS_END_JOINING_NHEJ	67	16	4.17569	2.53615e-06	0.000242478	KAT5:H2AFX:PIAS4:NHEJ1:HIST1H4B:HIST1H4C:HIST1H2BD:HIST1H4D:HIST1H2BF:HIST1H4E:HIST1H2BG:HIST1H4F:HIST1H4H:HIST1H2BJ:HIST1H2BK:POLM
Cluster 1	Canonical_Pathways	REACTOME_POSITIVE_EPIGENETIC_REGULATION_OF_RRNA_EXPRESSION	100	20	6.23237	2.94895e-06	0.000270198	POLR2L:H2AFX:POLR1D:KAT2B:HIST1H4B:HIST1H2AB:HIST1H4C:HIST1H2AC:HIST1H2BD:HIST1H4D:HIST1H2BF:HIST1H4E:HIST1H2BG:HIST1H3E:HIST1H4F:HIST1H4H:HIST1H2BJ:HIST1H2BK:ACTB:H2AFV
Cluster 1	Canonical_Pathways	REACTOME_G2_M_CHECKPOINTS	164	27	10.2211	3.25957e-06	0.000286712	KAT5:H2AFX:RAD9B:PSME1:PSME2:PSMB10:RPA1:PSMB6:PSMD12:PIAS4:UBA52:PSME4:MCM6:ATRIP:HIST1H4B:HIST1H4C:HIST1H2BD:HIST1H4D:HIST1H2BF:HIST1H4E:HIST1H2BG:HIST1H4F:HIST1H4H:HIST1H2BJ:HIST1H2BK:ORC3:WRN
Cluster 1	Canonical_Pathways	REACTOME_RUNX1_REGULATES_GENES_INVOLVED_IN_MEGAKARYOCYTE_DIFFERENTIATION_AND_PLATELET_FUNCTION	93	19	5.7961	3.72551e-06	0.000306516	MOV10:H2AFX:GP1BA:KAT2B:HIST1H4B:HIST1H2AB:HIST1H4C:HIST1H2AC:HIST1H2BD:HIST1H4D:HIST1H2BF:HIST1H4E:HIST1H2BG:HIST1H3E:HIST1H4F:HIST1H4H:HIST1H2BJ:HIST1H2BK:H2AFV
Cluster 1	Canonical_Pathways	REACTOME_PRC2_METHYLATES_HISTONES_AND_DNA	69	16	4.30033	3.83737e-06	0.000306516	H2AFX:HIST1H4B:HIST1H2AB:HIST1H4C:HIST1H2AC:HIST1H2BD:HIST1H4D:HIST1H2BF:HIST1H4E:HIST1H2BG:HIST1H3E:HIST1H4F:HIST1H4H:HIST1H2BJ:HIST1H2BK:H2AFV
Cluster 1	Canonical_Pathways	REACTOME_RNA_POLYMERASE_I_PROMOTER_ESCAPE	85	18	5.29751	3.90289e-06	0.000306516	POLR2L:H2AFX:POLR1D:HIST1H4B:HIST1H2AB:HIST1H4C:HIST1H2AC:HIST1H2BD:HIST1H4D:HIST1H2BF:HIST1H4E:HIST1H2BG:HIST1H3E:HIST1H4F:HIST1H4H:HIST1H2BJ:HIST1H2BK:H2AFV
Cluster 1	Canonical_Pathways	REACTOME_HATS_ACETYLATE_HISTONES	138	24	8.60067	4.26299e-06	0.000319737	MEAF6:KAT5:YEATS4:MBIP:CCDC101:ELP5:TADA3:KAT2B:JADE2:HIST1H4B:HIST1H2AB:HIST1H4C:HIST1H2AC:HIST1H2BD:HIST1H4D:HIST1H2BF:HIST1H4E:HIST1H2BG:HIST1H3E:HIST1H4F:HIST1H4H:HIST1H2BJ:HIST1H2BK:ACTB
Cluster 1	Canonical_Pathways	REACTOME_OXIDATIVE_STRESS_INDUCED_SENESCENCE	120	22	7.47884	4.36204e-06	0.000319737	MOV10:H2AFX:MDM2:MAPK3:MINK1:UBA52:MAPKAPK3:HIST1H4B:HIST1H2AB:HIST1H4C:HIST1H2AC:HIST1H2BD:HIST1H4D:HIST1H2BF:HIST1H4E:HIST1H2BG:HIST1H3E:HIST1H4F:HIST1H4H:HIST1H2BJ:HIST1H2BK:H2AFV
Cluster 1	Canonical_Pathways	REACTOME_CONDENSATION_OF_PROPHASE_CHROMOSOMES	70	16	4.36266	4.68962e-06	0.000323408	H2AFX:HIST1H4B:HIST1H2AB:HIST1H4C:HIST1H2AC:HIST1H2BD:HIST1H4D:HIST1H2BF:HIST1H4E:HIST1H2BG:HIST1H3E:HIST1H4F:HIST1H4H:HIST1H2BJ:HIST1H2BK:H2AFV
Cluster 1	Canonical_Pathways	REACTOME_TRANSCRIPTIONAL_REGULATION_BY_SMALL_RNAS	103	20	6.41934	4.74816e-06	0.000323408	POLR2L:H2AFX:NUP88:NUP54:HIST1H4B:HIST1H2AB:HIST1H4C:HIST1H2AC:HIST1H2BD:HIST1H4D:HIST1H2BF:HIST1H4E:HIST1H2BG:HIST1H3E:HIST1H4F:HIST1H4H:HIST1H2BJ:HIST1H2BK:H2AFV:POM121C
Cluster 1	Canonical_Pathways	REACTOME_MITOTIC_PROPHASE	139	24	8.66299	4.85333e-06	0.000323408	LMNA:BANF1:H2AFX:MAPK3:NUP88:NUP54:HIST1H4B:HIST1H2AB:HIST1H4C:HIST1H2AC:HIST1H2BD:HIST1H4D:HIST1H2BF:HIST1H4E:HIST1H2BG:HIST1H3E:HIST1H4F:HIST1H4H:HIST1H2BJ:HIST1H2BK:LEMD2:H2AFV:POM121C:PPP2CB
Cluster 1	Canonical_Pathways	REACTOME_RNA_POLYMERASE_I_TRANSCRIPTION	104	20	6.48166	5.5392e-06	0.000348628	POLR2L:H2AFX:POLR1D:MAPK3:KAT2B:HIST1H4B:HIST1H2AB:HIST1H4C:HIST1H2AC:HIST1H2BD:HIST1H4D:HIST1H2BF:HIST1H4E:HIST1H2BG:HIST1H3E:HIST1H4F:HIST1H4H:HIST1H2BJ:HIST1H2BK:H2AFV
Cluster 1	Canonical_Pathways	REACTOME_ERCC6_CSB_AND_EHMT2_G9A_POSITIVELY_REGULATE_RRNA_EXPRESSION	71	16	4.42498	5.70742e-06	0.000348628	H2AFX:HIST1H4B:HIST1H2AB:HIST1H4C:HIST1H2AC:HIST1H2BD:HIST1H4D:HIST1H2BF:HIST1H4E:HIST1H2BG:HIST1H3E:HIST1H4F:HIST1H4H:HIST1H2BJ:HIST1H2BK:H2AFV
Cluster 1	Canonical_Pathways	REACTOME_NUCLEOSOME_ASSEMBLY	71	16	4.42498	5.70742e-06	0.000348628	H2AFX:HIST1H4B:HIST1H2AB:HIST1H4C:HIST1H2AC:HIST1H2BD:HIST1H4D:HIST1H2BF:HIST1H4E:HIST1H2BG:HIST1H4F:HIST1H4H:HIST1H2BJ:HIST1H2BK:CENPQ:H2AFV
Cluster 1	Canonical_Pathways	REACTOME_CELLULAR_SENESCENCE	189	29	11.7792	6.05632e-06	0.000359942	MOV10:KAT5:H2AFX:MDM2:ANAPC7:MAPK3:TERF2:MINK1:UBA52:CCNE1:MAPKAPK3:ANAPC4:HIST1H4B:HIST1H2AB:HIST1H1C:HIST1H4C:HIST1H2AC:HIST1H1E:HIST1H2BD:HIST1H4D:HIST1H2BF:HIST1H4E:HIST1H2BG:HIST1H3E:HIST1H4F:HIST1H4H:HIST1H2BJ:HIST1H2BK:H2AFV
Cluster 1	Canonical_Pathways	REACTOME_SENESCENCE_ASSOCIATED_SECRETORY_PHENOTYPE_SASP	105	20	6.54399	6.44748e-06	0.000373106	H2AFX:ANAPC7:MAPK3:UBA52:ANAPC4:HIST1H4B:HIST1H2AB:HIST1H4C:HIST1H2AC:HIST1H2BD:HIST1H4D:HIST1H2BF:HIST1H4E:HIST1H2BG:HIST1H3E:HIST1H4F:HIST1H4H:HIST1H2BJ:HIST1H2BK:H2AFV
Cluster 1	Canonical_Pathways	REACTOME_CHROMOSOME_MAINTENANCE	107	20	6.66863	8.67804e-06	0.000489308	H2AFX:POLE:TERF2:RPA1:HIST1H4B:HIST1H2AB:HIST1H4C:HIST1H2AC:HIST1H2BD:HIST1H4D:HIST1H2BF:HIST1H4E:HIST1H2BG:HIST1H4F:HIST1H4H:HIST1H2BJ:HIST1H2BK:CENPQ:H2AFV:POLA1
Cluster 1	Canonical_Pathways	REACTOME_CELL_CYCLE_MITOTIC	528	59	32.9069	9.34195e-06	0.000513574	CDK11B:LMNA:SDCCAG8:AKT3:WAPAL:BANF1:H2AFX:ANAPC7:PPP1CC:POLE:ANKLE2:PDS5B:PSME1:PSME2:LCMT1:MAPK3:RBL2:PSMB10:RPA1:PSMB6:NUP88:MIS12:DYNLL2:PSMD12:TUBB6:UBA52:CCNE1:HAUS5:PSME4:MCM6:TUBA4A:GINS1:NINL:ANAPC4:NUP54:HIST1H4B:HIST1H2AB:HIST1H4C:HIST1H2AC:HIST1H2BD:HIST1H4D:HIST1H2BF:HIST1H4E:HIST1H2BG:HIST1H3E:HIST1H4F:HIST1H4H:HIST1H2BJ:HIST1H2BK:LEMD2:CENPQ:ORC3:MAD1L1:FBXL18:H2AFV:POM121C:PPP2CB:…
Cluster 1	Canonical_Pathways	REACTOME_ESTROGEN_DEPENDENT_GENE_EXPRESSION	146	24	9.09926	1.15574e-05	0.000619869	MOV10:POLR2L:KAT5:H2AFX:AXIN1:KPNA2:TGFA:ERBB4:KAT2B:HIST1H4B:HIST1H2AB:HIST1H4C:HIST1H2AC:HIST1H2BD:HIST1H4D:HIST1H2BF:HIST1H4E:HIST1H2BG:HIST1H3E:HIST1H4F:HIST1H4H:HIST1H2BJ:HIST1H2BK:H2AFV
Cluster 1	Canonical_Pathways	REACTOME_DNA_DOUBLE_STRAND_BREAK_RESPONSE	75	16	4.67428	1.20431e-05	0.000630545	KAT5:H2AFX:KPNA2:PIAS4:UBA52:HIST1H4B:HIST1H4C:HIST1H2BD:HIST1H4D:HIST1H2BF:HIST1H4E:HIST1H2BG:HIST1H4F:HIST1H4H:HIST1H2BJ:HIST1H2BK
Cluster 1	Canonical_Pathways	REACTOME_G2_M_DNA_DAMAGE_CHECKPOINT	93	18	5.7961	1.46713e-05	0.000750282	KAT5:H2AFX:RAD9B:RPA1:PIAS4:ATRIP:HIST1H4B:HIST1H4C:HIST1H2BD:HIST1H4D:HIST1H2BF:HIST1H4E:HIST1H2BG:HIST1H4F:HIST1H4H:HIST1H2BJ:HIST1H2BK:WRN
Cluster 1	Canonical_Pathways	REACTOME_M_PHASE	385	46	23.9946	1.67817e-05	0.000838702	LMNA:SDCCAG8:WAPAL:BANF1:H2AFX:ANAPC7:PPP1CC:ANKLE2:PDS5B:PSME1:PSME2:MAPK3:PSMB10:PSMB6:NUP88:MIS12:DYNLL2:PSMD12:TUBB6:UBA52:HAUS5:PSME4:TUBA4A:NINL:ANAPC4:NUP54:HIST1H4B:HIST1H2AB:HIST1H4C:HIST1H2AC:HIST1H2BD:HIST1H4D:HIST1H2BF:HIST1H4E:HIST1H2BG:HIST1H3E:HIST1H4F:HIST1H4H:HIST1H2BJ:HIST1H2BK:LEMD2:CENPQ:MAD1L1:H2AFV:POM121C:PPP2CB
Cluster 1	Canonical_Pathways	REACTOME_TRANSCRIPTIONAL_REGULATION_OF_GRANULOPOIESIS	86	17	5.35984	1.88621e-05	0.000921727	TAL1:H2AFX:HIST1H4B:HIST1H2AB:HIST1H4C:HIST1H2AC:HIST1H2BD:HIST1H4D:HIST1H2BF:HIST1H4E:HIST1H2BG:HIST1H3E:HIST1H4F:HIST1H4H:HIST1H2BJ:HIST1H2BK:H2AFV
Cluster 1	Canonical_Pathways	REACTOME_CELL_CYCLE_CHECKPOINTS	287	37	17.8869	2.12986e-05	0.00101817	KAT5:H2AFX:MDM2:ANAPC7:RAD9B:PPP1CC:PSME1:PSME2:PSMB10:RPA1:PSMB6:MIS12:DYNLL2:PSMD12:PIAS4:UBA52:CCNE1:PSME4:MCM6:ATRIP:ANAPC4:HIST1H4B:HIST1H4C:HIST1H2BD:HIST1H4D:HIST1H2BF:HIST1H4E:HIST1H2BG:HIST1H4F:HIST1H4H:HIST1H2BJ:HIST1H2BK:CENPQ:ORC3:MAD1L1:PPP2CB:WRN
Cluster 1	Canonical_Pathways	REACTOME_AMYLOID_FIBER_FORMATION	105	19	6.54399	2.3337e-05	0.00109187	UBE2L6:H2AFX:LYZ:UBA52:HIST1H4B:HIST1H2AB:HIST1H4C:HIST1H2AC:HIST1H2BD:HIST1H4D:HIST1H2BF:HIST1H4E:HIST1H2BG:HIST1H3E:HIST1H4F:HIST1H4H:HIST1H2BJ:HIST1H2BK:PARK2
Cluster 1	Canonical_Pathways	REACTOME_FORMATION_OF_THE_BETA_CATENIN:TCF_TRANSACTIVATING_COMPLEX	88	17	5.48448	2.58236e-05	0.00118304	KAT5:H2AFX:HIST1H4B:HIST1H2AB:HIST1H4C:HIST1H2AC:HIST1H2BD:HIST1H4D:HIST1H2BF:HIST1H4E:HIST1H2BG:HIST1H3E:HIST1H4F:HIST1H4H:HIST1H2BJ:HIST1H2BK:H2AFV
Cluster 1	Canonical_Pathways	REACTOME_ESR_MEDIATED_SIGNALING	217	30	13.5242	3.37079e-05	0.00151273	MOV10:NRAS:AKT3:POLR2L:KAT5:H2AFX:AXIN1:MAPK3:KPNA2:TGFA:ERBB4:MMP9:KAT2B:GNAI2:HIST1H4B:HIST1H2AB:HIST1H4C:HIST1H2AC:HIST1H2BD:HIST1H4D:HIST1H2BF:HIST1H4E:HIST1H2BG:HIST1H3E:HIST1H4F:HIST1H4H:HIST1H2BJ:HIST1H2BK:H2AFV:ZDHHC21
Cluster 1	Canonical_Pathways	REACTOME_RHO_GTPASES_ACTIVATE_PKNS	90	17	5.60913	3.49785e-05	0.00153836	H2AFX:RHOA:HIST1H4B:HIST1H2AB:HIST1H4C:HIST1H2AC:HIST1H2BD:HIST1H4D:HIST1H2BF:HIST1H4E:HIST1H2BG:HIST1H3E:HIST1H4F:HIST1H4H:HIST1H2BJ:HIST1H2BK:H2AFV
Cluster 1	Canonical_Pathways	REACTOME_ACTIVATION_OF_HOX_GENES_DURING_DIFFERENTIATION	118	20	7.35419	3.85657e-05	0.00166286	POLR2L:H2AFX:HOXB2:HOXB3:HOXB4:HIST1H4B:HIST1H2AB:HIST1H4C:HIST1H2AC:HIST1H2BD:HIST1H4D:HIST1H2BF:HIST1H4E:HIST1H2BG:HIST1H3E:HIST1H4F:HIST1H4H:HIST1H2BJ:HIST1H2BK:H2AFV
Cluster 1	Canonical_Pathways	REACTOME_SIGNALING_BY_WNT	321	39	20.0059	4.97466e-05	0.00210371	RSPO1:MOV10:PRKG1:CTBP2:AP2A2:LGR4:KAT5:H2AFX:VPS29:PSME1:PSME2:DAAM1:AXIN1:PSMB10:PSMB6:RNF43:PSMD12:UBA52:PSME4:RHOA:APC:HIST1H4B:HIST1H2AB:HIST1H4C:HIST1H2AC:HIST1H2BD:HIST1H4D:HIST1H2BF:HIST1H4E:HIST1H2BG:HIST1H3E:HIST1H4F:HIST1H4H:HIST1H2BJ:HIST1H2BK:ITPR3:H2AFV:SMURF1:PPP2CB
Cluster 1	Canonical_Pathways	REACTOME_NEGATIVE_EPIGENETIC_REGULATION_OF_RRNA_EXPRESSION	103	18	6.41934	6.12633e-05	0.00254185	POLR2L:H2AFX:POLR1D:HIST1H4B:HIST1H2AB:HIST1H4C:HIST1H2AC:HIST1H2BD:HIST1H4D:HIST1H2BF:HIST1H4E:HIST1H2BG:HIST1H3E:HIST1H4F:HIST1H4H:HIST1H2BJ:HIST1H2BK:H2AFV
Cluster 1	Canonical_Pathways	REACTOME_DEUBIQUITINATION	291	36	18.1362	6.57061e-05	0.0026757	VDAC2:ZRANB1:DDB2:RCE1:BIRC2:MDM2:PSME1:PSME2:TRAF3:OTUD7A:SMAD3:AXIN1:INO80E:PSMB10:PSMB6:PSMD12:USP14:UBA52:PSME4:USP16:TADA3:KAT2B:USP4:RHOA:RNF123:APC:HIST1H2AB:HIST1H2AC:HIST1H2BD:HIST1H2BF:HIST1H2BG:HIST1H2BJ:HIST1H2BK:PARK2:ACTB:VCPIP1
Cluster 1	Canonical_Pathways	KEGG_SULFUR_METABOLISM	13	6	0.810208	6.75704e-05	0.00270159	SUOX:SULT1A2:SULT1A1:SULT1A4:SULT1A3:CHST12
Cluster 1	Canonical_Pathways	REACTOME_TCF_DEPENDENT_SIGNALING_IN_RESPONSE_TO_WNT	226	30	14.0852	7.25448e-05	0.00284868	RSPO1:LGR4:KAT5:H2AFX:PSME1:PSME2:AXIN1:PSMB10:PSMB6:RNF43:PSMD12:UBA52:PSME4:APC:HIST1H4B:HIST1H2AB:HIST1H4C:HIST1H2AC:HIST1H2BD:HIST1H4D:HIST1H2BF:HIST1H4E:HIST1H2BG:HIST1H3E:HIST1H4F:HIST1H4H:HIST1H2BJ:HIST1H2BK:H2AFV:PPP2CB
Cluster 1	Canonical_Pathways	KEGG_SYSTEMIC_LUPUS_ERYTHEMATOSUS	115	19	7.16722	8.53365e-05	0.00329219	C1QB:H2AFX:ACTN1:HIST1H4B:HIST1H2AB:HIST1H3C:HIST1H4C:HIST1H2AC:HIST1H2BD:HIST1H4D:HIST1H2BF:HIST1H4E:HIST1H2BG:HIST1H3E:HIST1H4F:HIST1H4H:HIST1H2BJ:HIST1H2BK:H2AFV
Cluster 1	Canonical_Pathways	REACTOME_GENE_SILENCING_BY_RNA	133	20	8.28905	0.00021281	0.00806843	POLR2L:H2AFX:NUP88:NUP54:HIST1H4B:HIST1H2AB:HIST1H4C:HIST1H2AC:HIST1H2BD:HIST1H4D:HIST1H2BF:HIST1H4E:HIST1H2BG:HIST1H3E:HIST1H4F:HIST1H4H:HIST1H2BJ:HIST1H2BK:H2AFV:POM121C
Cluster 1	Canonical_Pathways	KEGG_UBIQUITIN_MEDIATED_PROTEOLYSIS	134	20	8.35137	0.000235787	0.00878806	DDB2:UBE2L6:SYVN1:BIRC2:CBL:MDM2:ANAPC7:PIAS1:WWP2:UBE2Z:PIAS4:SAE1:UBE2E3:TRIP12:UBA7:RNF7:ANAPC4:PARK2:SMURF1:WWP1
Cluster 1	Canonical_Pathways	REACTOME_TRANSCRIPTIONAL_REGULATION_BY_RUNX1	231	29	14.3968	0.000252463	0.00925276	TAL1:MOV10:H2AFX:PSME1:PSME2:SOCS4:AXIN1:PSMB10:PSMB6:GP1BA:PSMD12:UBA52:PSME4:KAT2B:HIST1H4B:HIST1H2AB:HIST1H4C:HIST1H2AC:HIST1H2BD:HIST1H4D:HIST1H2BF:HIST1H4E:HIST1H2BG:HIST1H3E:HIST1H4F:HIST1H4H:HIST1H2BJ:HIST1H2BK:H2AFV
Cluster 1	Canonical_Pathways	REACTOME_DISEASES_OF_SIGNAL_TRANSDUCTION	384	42	23.9323	0.000277292	0.00999614	MIB2:NRAS:LMNA:PSEN2:AKT3:VCL:CTBP2:POLR2L:SYVN1:MAP3K11:CBL:ERBB3:MDM2:CPSF6:KL:PSME1:PSME2:PSEN1:SMAD3:AXIN1:CD19:MAPK3:PSMB10:PSMB6:STAT5A:RNF43:PSMD12:MAP2K2:UBA52:ERLEC1:PSME4:TGFA:STAT1:ERBB4:FKBP1A:KAT2B:RASA2:MAML3:APC:ACTB:PPP2CB:JAK2
Cluster 1	Canonical_Pathways	REACTOME_BUTYROPHILIN_BTN_FAMILY_INTERACTIONS	11	5	0.685561	0.000312548	0.0110854	BTNL9:BTN3A2:BTN2A2:BTN3A3:BTN2A1
Cluster 1	Canonical_Pathways	REACTOME_CYTOKINE_SIGNALING_IN_IMMUNE_SYSTEM	824	76	51.3547	0.000371363	0.0129623	TNFRSF14:GBP1:GBP2:NRAS:MUC1:LAMTOR2:PTPN7:IL15RA:VCL:IRF7:UBE2L6:MAP3K11:CFL1:DLG2:BIRC2:CBL:ERBB3:STAT2:STAT6:KL:TNFSF13B:PSME1:PSME2:RPS6KA5:TRAF3:SMAD3:PIAS1:IL27:SH2B1:LAT:BOLA2:MAPK3:BOLA2B:MT2A:PSMB10:IL34:IRF8:PSMB6:NUP88:CCL3L3:CCL3L1:STAT5A:PSMD12:KPNA2:MAP2K2:IL12RB1:IFI30:UBA52:CRLF1:PSME4:SPTBN1:TGFA:STAT1:ERBB4:INPP5D:MMP9:ITGB2:UBA7:MAPKAPK3:RASA2:CXCL10:NUP54:PAQR3:IL15:MEF2C:RANB…
Cluster 1	Canonical_Pathways	REACTOME_EPIGENETIC_REGULATION_OF_GENE_EXPRESSION	140	20	8.72532	0.000424895	0.0145991	POLR2L:H2AFX:POLR1D:KAT2B:HIST1H4B:HIST1H2AB:HIST1H4C:HIST1H2AC:HIST1H2BD:HIST1H4D:HIST1H2BF:HIST1H4E:HIST1H2BG:HIST1H3E:HIST1H4F:HIST1H4H:HIST1H2BJ:HIST1H2BK:ACTB:H2AFV
Cluster 1	Canonical_Pathways	REACTOME_HDACS_DEACETYLATE_HISTONES	91	15	5.67146	0.0004721	0.0159715	PHF21A:HIST1H4B:HIST1H2AB:HIST1H4C:HIST1H2AC:HIST1H2BD:HIST1H4D:HIST1H2BF:HIST1H4E:HIST1H2BG:HIST1H3E:HIST1H4F:HIST1H4H:HIST1H2BJ:HIST1H2BK
Cluster 1	Canonical_Pathways	REACTOME_RHO_GTPASE_EFFECTORS	318	35	19.8189	0.000770138	0.0256596	CFL1:H2AFX:ARPC3:PPP1CC:DAAM1:MAPK3:MIS12:DYNLL2:TUBB6:TUBA4A:NCF4:RHOA:IQGAP2:HIST1H4B:HIST1H2AB:HIST1H4C:HIST1H2AC:HIST1H2BD:HIST1H4D:HIST1H2BF:HIST1H4E:HIST1H2BG:HIST1H3E:HIST1H4F:HIST1H4H:HIST1H2BJ:HIST1H2BK:CENPQ:MAD1L1:ACTB:H2AFV:NCF1:ARPC1A:ARPC1B:PPP2CB
Cluster 1	Canonical_Pathways	REACTOME_SIGNALING_BY_NUCLEAR_RECEPTORS	259	30	16.1418	0.000783498	0.0257151	MOV10:NRAS:AKT3:POLR2L:KAT5:H2AFX:AXIN1:MAPK3:KPNA2:TGFA:ERBB4:MMP9:KAT2B:GNAI2:HIST1H4B:HIST1H2AB:HIST1H4C:HIST1H2AC:HIST1H2BD:HIST1H4D:HIST1H2BF:HIST1H4E:HIST1H2BG:HIST1H3E:HIST1H4F:HIST1H4H:HIST1H2BJ:HIST1H2BK:H2AFV:ZDHHC21
Cluster 1	Canonical_Pathways	REACTOME_HDR_THROUGH_HOMOLOGOUS_RECOMBINATION_HRR	67	12	4.17569	0.000795638	0.0257295	KAT5:MUS81:RAD9B:POLE:SLX1B:SLX1A:RPA1:RAD51C:UBA52:ATRIP:POLK:WRN
Cluster 1	Canonical_Pathways	REACTOME_UB_SPECIFIC_PROCESSING_PROTEASES	214	26	13.3373	0.000845332	0.0269404	VDAC2:DDB2:RCE1:BIRC2:MDM2:PSME1:PSME2:SMAD3:AXIN1:PSMB10:PSMB6:PSMD12:USP14:UBA52:PSME4:USP16:TADA3:USP4:RNF123:HIST1H2AB:HIST1H2AC:HIST1H2BD:HIST1H2BF:HIST1H2BG:HIST1H2BJ:HIST1H2BK
Cluster 1	GO_cc	GO_PROTEIN_DNA_COMPLEX	196	28	12.2154	3.35246e-05	0.0228631	BCAS2:H2AFX:NUPR1:TERF2:RPA1:GINS1:HIST1H4B:HIST1H2AB:HIST1H3C:HIST1H1C:HIST1H4C:HIST1H2AC:HIST1H1E:HIST1H2BD:HIST1H4D:HIST1H2BF:HIST1H4E:HIST1H2BG:HIST1H3E:HIST1H4F:HIST1H4H:HIST1H2BJ:HIST1H2BK:ORC3:H2AFV:PURB:WRN:POLA1
Cluster 1	GO_cc	GO_DNA_PACKAGING_COMPLEX	110	19	6.85561	4.56805e-05	0.0228631	H2AFX:HIST1H4B:HIST1H2AB:HIST1H3C:HIST1H1C:HIST1H4C:HIST1H2AC:HIST1H1E:HIST1H2BD:HIST1H4D:HIST1H2BF:HIST1H4E:HIST1H2BG:HIST1H3E:HIST1H4F:HIST1H4H:HIST1H2BJ:HIST1H2BK:H2AFV
Cluster 1	GO_cc	GO_NUCLEAR_CHROMOSOME	595	61	37.0826	8.65416e-05	0.028876	HMGB4:TAL1:BCAS2:SYCP1:MUC1:WAPAL:TNKS1BP1:KAT5:H2AFX:STAT6:CPSF6:YEATS4:RAD9B:PPP1CC:POLE:DPF3:SMAD3:SLX1B:INO80E:TBX6:SLX1A:TERF2:RPA1:MIS12:BPTF:SMCHD1:ASXL3:ZBTB7A:SIRT6:UPF1:MCM6:TTC21B:STAT1:GINS1:HMGXB4:CCDC36:RGS12:MEF2C:FER:HIST1H4B:HIST1H2AB:HIST1H3C:HIST1H1C:HIST1H4C:HIST1H2AC:HIST1H1E:HIST1H4D:HIST1H4E:HIST1H3E:HIST1H4F:HIST1H4H:ORC3:MMS22L:ACTB:ZMIZ2:H2AFV:PURB:BUD31:STAG3:WRN:POLA1
Cluster 1	GO_cc	GO_ENDOSOME	858	80	53.4737	0.000186231	0.0338286	MIB2:INPP5B:LEPROT:LAMTOR2:RAB25:ARL8A:PSEN2:IL15RA:IRF7:CHID1:AP2A2:PICALM:VPS11:SNX19:PMEL:RAB5B:ANKRD13A:VPS29:NDFIP2:PSEN1:NUMB:TRAF3:AMN:ABHD17C:RAB11FIP3:CLN3:CLN3:RABEP2:MAPK3:CORO1A:CLEC18A:CLEC18C:USP6:RABEP1:SNF8:NGFR:C18orf8:NPC1:ABHD17A:SCAMP4:MAP2K2:UBA52:CD79A:EHD2:VAMP5:ALS2:SLC11A1:ABCB6:ATG9A:PTPRN:DNER:CHMP4B:MAP1LC3A:ATP6V1E1:NCF4:RAB5A:RHOA:MON1A:HYAL3:CHMP2B:EPHB1:PI4K2B:SCAR…
Cluster 1	GO_cc	GO_CHROMOSOME	1046	94	65.1906	0.000195269	0.0338286	MAD2L2:HMGB4:MEAF6:TAL1:BCAS2:SYCP1:MUC1:PSEN2:WAPAL:TNKS1BP1:KAT5:BANF1:C11orf80:BIRC2:H2AFX:STAT6:CPSF6:YEATS4:ARPC3:RAD9B:PPP1CC:POLE:PDS5B:DPF3:PSEN1:SMAD3:WDR61:SLX1B:INO80E:TBX6:SLX1A:RBL2:TERF2:MAF:RPA1:PELP1:MIS12:TEX14:RAD51C:BPTF:SMCHD1:ASXL3:ZBTB7A:SIRT6:ELL:UPF1:MCM6:TTC21B:STAT1:NSFL1C:GINS1:HMGXB4:KAT2B:CCDC36:PARP3:DHX36:RGS12:POLK:MEF2C:FER:APC:HIST1H4B:HIST1H2AB:HIST1H3C:HIST1H1C…
Cluster 1	GO_cc	GO_EXTRINSIC_COMPONENT_OF_PRESYNAPTIC_MEMBRANE	6	4	0.373942	0.000202769	0.0338286	PICALM:STXBP5:HIP1:DGKI
Cluster 1	GO_cc	GO_SIDE_OF_MEMBRANE	470	49	29.2921	0.000282718	0.0404287	TNFRSF14:LEPR:RGS1:PTPN7:BIRC2:CXCR5:C2CD2L:RPS26:ESYT1:ATP2A2:FARP1:RNF31:TRAF3:CD19:CDH13:RTN4RL1:GP1BA:MAP2K2:IL12RB1:CRLF1:CD79A:ITGB6:FKBP1A:CHMP4B:ITGB2:RAB5A:RHOA:DAG1:GNAT1:GNAI2:ALCAM:HHLA2:NLGN1:CXCL10:EFNA5:FER:BTNL9:BTN3A2:BTN2A2:BTN3A3:BTN2A1:EEF1A1:ENPP3:HIP1:AZGP1:GFRA2:PTK2B:GSR:TLR4
Cluster 1	GO_cc	GO_SYNAPSE	1160	101	72.2955	0.000356395	0.0445939	CAMK2N1:C1QB:GRIK3:DAB1:DNAJC6:PDE4B:RPL5:KCND3:HCN3:PSEN2:ANK3:VDAC2:GRID1:CTBP2:LIN7C:BDNF:MAPK8IP1:FOSL1:DLG2:PICALM:CADM1:TRAPPC4:PLEKHA5:RAB5B:MDM2:ANKS1B:ATP2A2:PPP1CC:P2RX2:FARP1:ACTN1:PSEN1:NUMB:ABHD17C:CLN3:CLN3:TUFM:PRRT2:DOC2A:CORO1A:SEPT1:SEPT1:CDH13:PLD2:MINK1:CHRNE:ASIC2:IGF2BP1:DYNLL2:KPNA2:USP14:ABHD17A:EEF2:UBA52:CRTC1:LRFN1:SPTBN1:SCN2A:ALS2:ERBB4:PTPRN:DES:MAP1LC3A:GRIK1:NEFH:R…
Cluster 1	GO_cc	GO_NUCLEAR_NUCLEOSOME	38	9	2.3683	0.000430134	0.0478404	HIST1H4B:HIST1H3C:HIST1H4C:HIST1H1E:HIST1H4D:HIST1H4E:HIST1H3E:HIST1H4F:HIST1H4H
Cluster 1	GO_cc	GO_DENDRITIC_TREE	584	57	36.397	0.000510935	0.0493874	CAMK2N1:GRIK3:PDE4B:KCND3:HCN3:BRINP3:ANK3:BDNF:MAPK8IP1:RIN1:TRAPPC4:ANKS1B:PPP1CC:FARP1:ADCY4:PSEN1:SKOR1:ABHD17C:ADCY9:PRRT2:TAOK2:NQO1:MINK1:KIF1C:ASIC2:IGF2BP1:ABHD17A:CRTC1:URI1:STAT1:ALS2:DNER:ABHD12:RAB5A:RHOA:BSN:GNAI2:HTR1F:ALCAM:IFT57:EPHB1:DHX36:NLGN1:GRK4:RGS12:GRID2:BMPR1B:UNC5C:HTR1A:OPRM1:GPER1:ELFN1:NCF1:DGKI:PTK2B:BAI1:DENND1A
Cluster 1	GO_cc	GO_CHROMATIN	547	54	34.0911	0.000542718	0.0493874	HMGB4:TAL1:MUC1:WAPAL:TNKS1BP1:KAT5:H2AFX:STAT6:CPSF6:YEATS4:PDS5B:DPF3:SMAD3:WDR61:INO80E:TBX6:RBL2:MAF:PELP1:BPTF:ASXL3:ZBTB7A:SIRT6:ELL:UPF1:TTC21B:STAT1:HMGXB4:MEF2C:FER:HIST1H4B:HIST1H2AB:HIST1H3C:HIST1H1C:HIST1H4C:HIST1H2AC:HIST1H1E:HIST1H2BD:HIST1H4D:HIST1H2BF:HIST1H4E:HIST1H2BG:HIST1H3E:HIST1H4F:HIST1H4H:HMGN4:HIST1H2BJ:HIST1H2BK:LEMD2:ACTB:H2AFV:BUD31:STAG3:POLA1
Cluster 3	Canonical_Pathways	REACTOME_RESPONSE_TO_ELEVATED_PLATELET_CYTOSOLIC_CA2PLUS	130	19	4.93731	4.5892e-07	0.000723032	F5:SELP:CYB5R1:SRGN:FERMT3:ENDOD1:VWF:PRKCB:ITGA2B:ITGB3:ITGB3:PROS1:PPBP:MMRN1:EGF:F13A1:PPIA:CLU:TLN1:TIMP1
Cluster 3	Canonical_Pathways	REACTOME_HEMOSTASIS	610	49	23.1674	6.576e-07	0.000723032	F5:SELP:CYB5R1:APBB1IP:JMJD1C:SRGN:HRAS:MRVI1:PHF21A:FERMT3:ENDOD1:VWF:CLEC1B:TUBA1B:TUBA1A:TUBA1C:P2RX7:P2RX4:KLC1:KIF26A:ANXA2:PRKCB:ITGAX:ITGA2B:ITGB3:ITGB3:CEACAM3:SIRPA:TUBA8:VPREB3:RAF1:PROS1:MGLL:P2RY12:PF4V1:PPBP:MMRN1:EGF:PDE5A:GUCY1A3:GUCY1B3:LCP2:F13A1:TREM1:PPIA:PRKAR2B:NOS3:CLU:TLN1:TIMP1
Cluster 3	Canonical_Pathways	REACTOME_SIGNALING_BY_RECEPTOR_TYROSINE_KINASES	467	38	17.7363	8.91295e-06	0.00653319	DNM3:HRAS:PTPRJ:WASF3:RPS6KA5:ADAM10:IGF1R:MEF2A:PCSK6:PRKCB:NCOR1:UBB:CDK5R1:ITGB3:ITGB3:BAIAP2:PIK3C3:RIT2:BAX:NTF4:ABI2:MMP9:COL9A3:GRAP2:NCK1:AP2M1:POLR2H:MUC20:KIT:SPP1:EGF:GAB1:MEF2C:CTNNA1:ELMO1:NCF1:PTPN12:NOS3:ESRP1
Cluster 3	Canonical_Pathways	REACTOME_PLATELET_ACTIVATION_SIGNALING_AND_AGGREGATION	256	25	9.7227	1.56639e-05	0.00794663	F5:SELP:CYB5R1:APBB1IP:SRGN:FERMT3:ENDOD1:VWF:CLEC1B:PRKCB:ITGA2B:ITGB3:ITGB3:RAF1:PROS1:MGLL:P2RY12:PPBP:MMRN1:EGF:LCP2:F13A1:PPIA:CLU:TLN1:TIMP1
Cluster 3	Canonical_Pathways	REACTOME_COPI_INDEPENDENT_GOLGI_TO_ER_RETROGRADE_TRAFFIC	51	10	1.93694	1.80687e-05	0.00794663	GALNT2:ACTR1A:TUBA1B:TUBA1A:TUBA1C:DCTN5:DYNC1I2:TUBA8:DYNC1LI1:RAB6B
Cluster 3	Canonical_Pathways	REACTOME_SIGNALING_BY_BRAF_AND_RAF_FUSIONS	65	11	2.46866	2.99127e-05	0.010963	APBB1IP:HRAS:VWF:MARK3:ITGA2B:ITGB3:ITGB3:RAF1:QKI:CAMK2B:ESRP1:TLN1
Cluster 3	Canonical_Pathways	REACTOME_SIGNALING_BY_MODERATE_KINASE_ACTIVITY_BRAF_MUTANTS	45	9	1.70907	4.01772e-05	0.0126214	APBB1IP:HRAS:VWF:MARK3:ITGA2B:ITGB3:ITGB3:RAF1:CAMK2B:TLN1
Cluster 3	Canonical_Pathways	REACTOME_INTERLEUKIN_4_AND_INTERLEUKIN_13_SIGNALING	107	14	4.06379	5.22964e-05	0.014375	POU2F1:FOS:RORA:ITGAX:POMC:MMP9:OSM:HMOX1:BCL6:IL8:F13A1:CDKN1A:FOXO3:TIMP1
Cluster 3	Canonical_Pathways	REACTOME_SIGNALING_BY_INTERLEUKINS	623	44	23.6611	5.92303e-05	0.0144719	POU2F1:APBB1IP:SIGIRR:HRAS:PSMC3:VWF:FOS:RPS6KA5:MARK3:ANXA2:RORA:MEF2A:ITGAX:UBB:ITGA2B:ITGB3:ITGB3:PIK3C3:POMC:IL1R2:IL1R1:PTPRA:MMP9:OSM:HMOX1:RAF1:CCR1:IL20RB:PSMD2:BCL6:IL1RAP:KIT:IL8:CXCL1:EGF:GAB1:MEF2C:F13A1:CDKN1A:FOXO3:CAMK2B:PPIA:PTPN12:TLN1:TIMP1
Cluster 3	Canonical_Pathways	REACTOME_TRANSCRIPTIONAL_REGULATION_OF_WHITE_ADIPOCYTE_DIFFERENTIATION	83	12	3.15228	6.62978e-05	0.0145789	WNT10B:WNT1:NCOR1:NCOA1:CEBPB:MED15:PPARG:TBL1XR1:EBF1:ZNF467:MED30:TBL1X
Cluster 3	Canonical_Pathways	REACTOME_SMOOTH_MUSCLE_CONTRACTION	38	8	1.44321	7.3355e-05	0.0146643	ANXA2:MYL9:MYLK:ITGB5:GUCY1A3:GUCY1B3:CALD1:TLN1
Cluster 3	Canonical_Pathways	REACTOME_RHO_GTPASE_EFFECTORS	318	27	12.0774	8.57262e-05	0.0157093	IQGAP3:NUP160:CTTN:TUBA1B:TUBA1A:TUBA1C:WASF3:KLC1:PRKCB:BAIAP2:PIK3C3:LIN7B:CENPO:DYNC1I2:ABI2:MYL9:TUBA8:MKL1:DYNC1LI1:MYLK:NCK1:DVL3:CENPK:CTNNA1:HIST1H2AE:HIST1H2BH:NCF1
Cluster 3	Canonical_Pathways	REACTOME_INNATE_IMMUNE_SYSTEM	1022	63	38.8149	9.9781e-05	0.0168783	PPIE:CD247:DNM3:SIGIRR:HRAS:PSMC3:PTPRJ:PANX1:MRE11A:CLEC4A:ANO6:P2RX7:WASF3:DNAJC3:FOS:RPS6KA5:ADAM10:ANXA2:MEF2A:ITGAX:GPR97:HP:UBB:BAIAP2:RAB31:PIK3C3:CEACAM3:FPR2:YPEL5:QPCT:ABI2:SIRPA:PI3:SLPI:MMP9:GRAP2:RAF1:DYNC1LI1:PROS1:ACPP:NCK1:MME:PSMD2:POLR2H:MUC20:MUC4:CXCL1:PPBP:UBE2D3:TLR2:MEF2C:CD14:LCP2:TREM1:ARG1:HEBP2:ELMO1:PPIA:NCF1:AOC1:NOS3:CLU:GSN
Cluster 3	Canonical_Pathways	REACTOME_MAP2K_AND_MAPK_ACTIVATION	40	8	1.51917	0.000107885	0.0169457	APBB1IP:HRAS:VWF:MARK3:ITGA2B:ITGB3:ITGB3:RAF1:TLN1
Cluster 3	Canonical_Pathways	KEGG_GAP_JUNCTION	88	12	3.34218	0.000118293	0.0172972	HRAS:TUBA1B:TUBA1A:TUBA1C:PRKCB:ADCY3:TUBA8:RAF1:EGF:GUCY1A3:GUCY1B3:ADCY8
Cluster 3	Canonical_Pathways	REACTOME_CYTOKINE_SIGNALING_IN_IMMUNE_SYSTEM	824	53	31.295	0.000125855	0.0172972	TNFRSF9:POU2F1:TNFSF4:APBB1IP:IFITM2:IFITM1:IFITM3:SIGIRR:HRAS:PSMC3:NUP160:VWF:OASL:FOS:RPS6KA5:MARK3:ANXA2:RORA:MEF2A:ITGAX:UBB:ITGA2B:ITGB3:ITGB3:PIK3C3:POMC:IL1R2:IL1R1:PTPRA:MMP9:OSM:HMOX1:RAF1:CCR1:IL20RB:PSMD2:EIF4G1:BCL6:IL1RAP:KIT:IL8:CXCL1:EGF:GAB1:MEF2C:F13A1:CDKN1A:FOXO3:IFNGR1:CAMK2B:PPIA:PTPN12:TLN1:TIMP1
Cluster 3	Canonical_Pathways	REACTOME_ACTIVATION_OF_NMDA_RECEPTORS_AND_POSTSYNAPTIC_EVENTS	90	12	3.41814	0.000147246	0.0190467	HRAS:NRGN:PRKAG1:TUBA1B:TUBA1A:TUBA1C:CAMKK2:LIN7B:TUBA8:CAMK2B:PRKAR2B:ADCY8
Cluster 3	Canonical_Pathways	REACTOME_P130CAS_LINKAGE_TO_MAPK_SIGNALING_FOR_INTEGRINS	15	5	0.56969	0.000169264	0.0195901	APBB1IP:VWF:ITGA2B:ITGB3:ITGB3:TLN1
Cluster 3	Canonical_Pathways	REACTOME_GRB2:SOS_PROVIDES_LINKAGE_TO_MAPK_SIGNALING_FOR_INTEGRINS	15	5	0.56969	0.000169264	0.0195901	APBB1IP:VWF:ITGA2B:ITGB3:ITGB3:TLN1
Cluster 3	Canonical_Pathways	REACTOME_ONCOGENIC_MAPK_SIGNALING	81	11	3.07632	0.000233924	0.0236387	APBB1IP:HRAS:VWF:MARK3:ITGA2B:ITGB3:ITGB3:RAF1:QKI:CAMK2B:ESRP1:TLN1
Cluster 3	Canonical_Pathways	PID_SMAD2_3NUCLEAR_PATHWAY	81	11	3.07632	0.000233924	0.0236387	FOS:NCOR1:NCOA1:DLX1:CEBPB:MED15:ITGB5:SKIL:MEF2C:CDKN1A:FOXO3
Cluster 3	Canonical_Pathways	PID_MAPK_TRK_PATHWAY	34	7	1.2913	0.000240972	0.0236387	HRAS:FOS:RPS6KA5:CDK5R1:RIT2:RAF1:MEF2C
Cluster 3	Canonical_Pathways	REACTOME_MHC_CLASS_II_ANTIGEN_PRESENTATION	109	13	4.13975	0.000247244	0.0236387	DNM3:ACTR1A:TUBA1B:TUBA1A:TUBA1C:KLC1:KIF26A:DCTN5:DYNC1I2:TUBA8:DYNC1LI1:AP2M1:SEC24D
Cluster 3	Canonical_Pathways	PID_VEGFR1_2_PATHWAY	69	10	2.62057	0.0002602	0.0238408	PTPRJ:PRKAG1:CAMKK2:PRKCB:ITGB3:ITGB3:RAF1:NCK1:GAB1:CTNNA1:NOS3
Cluster 3	Canonical_Pathways	REACTOME_SIGNALING_BY_RAS_MUTANTS	58	9	2.2028	0.000311134	0.0273673	APBB1IP:HRAS:VWF:MARK3:ITGA2B:ITGB3:ITGB3:RAF1:CAMK2B:TLN1
Cluster 3	Canonical_Pathways	REACTOME_SIGNALING_BY_NTRKS	99	12	3.75995	0.000364476	0.0308263	DNM3:HRAS:RPS6KA5:MEF2A:PCSK6:CDK5R1:RIT2:BAX:NTF4:AP2M1:GAB1:MEF2C
Cluster 3	Canonical_Pathways	REACTOME_ADAPTIVE_IMMUNE_SYSTEM	719	46	27.3071	0.00039178	0.0319083	CD247:DNM3:ACTR1A:IFITM1:HRAS:PSMC3:PTPRJ:TUBA1B:TUBA1A:TUBA1C:ANAPC5:KLC1:KIF26A:RNF111:ASB7:DCTN5:PRKCB:UBB:WSB1:CD22:CD79A:VASP:DYNC1I2:HECW2:CD28:TUBA8:GRAP2:RAF1:DYNC1LI1:ITGB5:NCK1:AP2M1:PSMD2:UBE2D3:SEC24D:FBXW7:TLR2:ERAP2:LNPEP:CD14:LCP2:TREML1:TREM1:PPIA:NCF1:BLK
Cluster 3	Canonical_Pathways	REACTOME_ACTIVATION_OF_AMPK_DOWNSTREAM_OF_NMDARS	27	6	1.02544	0.000435943	0.0342371	PRKAG1:TUBA1B:TUBA1A:TUBA1C:CAMKK2:TUBA8
Cluster 3	Canonical_Pathways	REACTOME_GOLGI_TO_ER_RETROGRADE_TRANSPORT	131	14	4.97529	0.000456783	0.0346368	GALNT2:ACTR1A:ARF3:TUBA1B:TUBA1A:TUBA1C:KLC1:KIF26A:DCTN5:COPE:DYNC1I2:TUBA8:DYNC1LI1:RAB6B
Cluster 3	Canonical_Pathways	BIOCARTA_AKAP13_PATHWAY	11	4	0.417772	0.000547076	0.0401007	PRKAG1:AKAP13:LPAR2:PRKAR2B
Cluster 3	Canonical_Pathways	REACTOME_MYOGENESIS	29	6	1.1014	0.000655834	0.0465219	MEF2D:NEO1:MEF2A:CDH2:MEF2C:CTNNA1
Cluster 3	Canonical_Pathways	REACTOME_HSP90_CHAPERONE_CYCLE_FOR_STEROID_HORMONE_RECEPTORS_SHR	52	8	1.97492	0.000707396	0.0486113	ACTR1A:TUBA1B:TUBA1A:TUBA1C:DCTN5:DYNC1I2:TUBA8:DYNC1LI1
Cluster 3	GO_bp	GO_RESPONSE_TO_WOUNDING	642	55	24.3827	1.5356e-08	6.27509e-05	AKIRIN1:MACF1:PABPC4:PTPRF:PEAR1:F5:SELP:JMJD1C:HRAS:CD151:LYVE1:PHF21A:FERMT3:UBASH3B:VWF:CLEC1B:ANO6:WNT10B:WNT1:P2RX7:P2RX4:ZFP36L1:ANXA2:PRKCB:ITGA2B:ITGB3:ITGB3:BAX:INHBB:MYL9:RTN4R:HMOX1:RAF1:CCR1:PROS1:MYLK:P2RY12:PF4V1:SPP1:MMRN1:ISL1:CTNNA1:LCP2:F13A1:CDKN1A:TREML1:ARG1:PTPN12:PRKAR2B:NOS3:NOV:TLN1:NINJ1:GSN:ENTPD2:TIMP1
Cluster 3	GO_bp	GO_SECRETION	1600	105	60.7669	1.70751e-08	6.27509e-05	BMP8A:PPIE:PPT1:TMEM79:F5:SELP:TNFSF4:CYB5R1:SRGN:EXOC6:DRD4:NR1H3:PSMC3:C1QTNF4:PTPRJ:FERMT3:PANX1:ENDOD1:VWF:ANO6:P2RX7:P2RX4:DNAJC3:AQP9:ADAM10:ANXA2:PCSK6:PRKCB:ITGAX:GPR97:DHODH:HP:ADORA2B:ITGA2B:ITGB3:ITGB3:ABCC3:SEPT4:RAB31:PIK3C3:CD22:CEACAM3:LIN7B:PPFIA3:TRPM4:FPR2:NCOA1:POMC:YPEL5:QPCT:HK2:IL1R2:INHBB:ACSL3:SIRPA:OXT:SLPI:MMP9:NTSR1:SLC17A9:SEPT5:COMT:TANGO2:OSM:HMOX1:OXTR:RAF1:DYNC1LI1…
Cluster 3	GO_bp	GO_CELL_ACTIVATION	1315	90	49.9428	3.06947e-08	7.5202e-05	PPIE:PEAR1:FCRL3:SELP:TNFSF4:APBB1IP:CD151:NR1H3:SPI1:PSMC3:PTPRJ:MS4A1:FERMT3:UBASH3B:VWF:CLEC4A:CLEC1B:ANO6:WNT1:P2RX7:P2RX4:DNAJC3:ZFP36L1:ADAM10:ANXA2:RORA:DNASE1:PRKCB:ITGAX:GPR97:HP:ADORA2B:ITGA2B:ITGB3:ITGB3:RAB31:CD22:CEACAM3:CD79A:BCL3:BAX:FPR2:YPEL5:QPCT:HSPD1:CD28:IGFBP2:SIRPA:MYL9:SLA2:MAFB:SLPI:MMP9:CEBPB:HMOX1:GRAP2:RAF1:DYNC1LI1:ACPP:NCK1:IL20RB:P2RY12:MME:PSMD2:BCL6:RNF168:KIT:IL8…
Cluster 3	GO_bp	GO_INFLAMMATORY_RESPONSE	675	51	25.636	2.36231e-06	0.00402327	TSPAN2:SELP:TNFSF4:SIGIRR:NR1H3:ANO6:P2RX7:FOS:RPS6KA5:RORA:DNASE1:HP:HPR:ADORA2B:FPR2:IL1R2:IL1R1:CD28:SIRPA:MMP9:CEBPB:OSM:HMOX1:PPARG:CCR1:STAB1:PROK2:MGLL:IL20RB:LXN:BCL6:IL1RAP:KIT:IL8:CXCL6:PF4V1:CXCL1:PPBP:CXCL5:SPP1:TLR2:ISL1:CD14:BMP6:TREM1:CLU:POLB:NOV:ADCY8:PTGS1:TIMP1
Cluster 3	GO_bp	GO_WOUND_HEALING	532	43	20.205	2.73692e-06	0.00402327	AKIRIN1:MACF1:PABPC4:PEAR1:F5:SELP:JMJD1C:HRAS:CD151:PHF21A:FERMT3:UBASH3B:VWF:CLEC1B:ANO6:WNT10B:P2RX7:P2RX4:ANXA2:PRKCB:ITGA2B:ITGB3:ITGB3:MYL9:HMOX1:RAF1:PROS1:MYLK:P2RY12:PF4V1:MMRN1:LCP2:F13A1:CDKN1A:TREML1:PTPN12:PRKAR2B:NOS3:NOV:TLN1:NINJ1:GSN:ENTPD2:TIMP1
Cluster 3	GO_bp	GO_EXOCYTOSIS	886	61	33.6497	5.00432e-06	0.00526774	PPIE:TMEM79:F5:SELP:CYB5R1:SRGN:EXOC6:PSMC3:PTPRJ:FERMT3:ENDOD1:VWF:ANO6:P2RX7:DNAJC3:ADAM10:ANXA2:PRKCB:ITGAX:GPR97:HP:ADORA2B:ITGA2B:ITGB3:ITGB3:SEPT4:RAB31:CEACAM3:LIN7B:PPFIA3:FPR2:YPEL5:QPCT:SIRPA:SLPI:MMP9:SLC17A9:SEPT5:HMOX1:DYNC1LI1:CCR1:PROS1:ACPP:MME:PSMD2:KIT:CXCL1:PPBP:MMRN1:EGF:TLR2:CD14:F13A1:ARG1:HEBP2:SYTL3:PPIA:AOC1:CLU:TLN1:GSN:TIMP1
Cluster 3	GO_bp	GO_PLATELET_DEGRANULATION	125	17	4.74741	5.01689e-06	0.00526774	F5:SELP:CYB5R1:SRGN:FERMT3:ENDOD1:VWF:ITGA2B:ITGB3:ITGB3:PROS1:PPBP:MMRN1:EGF:F13A1:CLU:TLN1:TIMP1
Cluster 3	GO_bp	GO_REGULATION_OF_LIPID_TRANSPORT	105	15	3.98783	9.76058e-06	0.00896754	NR1H3:P2RX7:P2RX4:ANXA2:NCOR1:ITGB3:ITGB3:POMC:OXT:NTSR1:ABCG1:PPARG:SPP1:EGF:BMP6:ABCA1
Cluster 3	GO_bp	GO_REGULATION_OF_BODY_FLUID_LEVELS	491	39	18.6478	1.19061e-05	0.00942429	PABPC4:TMEM79:PEAR1:F5:SELP:JMJD1C:PHF21A:NR1H3:FERMT3:UBASH3B:VWF:CLEC1B:ANO6:P2RX7:P2RX4:ANXA2:PRKCB:DHODH:ITGA2B:ITGB3:ITGB3:NCOA1:ADCY3:HK2:OXT:MYL9:OXTR:RAF1:PROS1:P2RY12:PF4V1:MMRN1:LCP2:F13A1:TREML1:PRKAR2B:NOS3:ADCY8:TLN1:ENTPD2
Cluster 3	GO_bp	GO_COAGULATION	335	30	12.7231	1.28222e-05	0.00942429	PABPC4:PEAR1:F5:SELP:JMJD1C:PHF21A:FERMT3:UBASH3B:VWF:CLEC1B:ANO6:P2RX7:P2RX4:ANXA2:PRKCB:ITGA2B:ITGB3:ITGB3:MYL9:RAF1:PROS1:P2RY12:PF4V1:MMRN1:LCP2:F13A1:TREML1:PRKAR2B:NOS3:TLN1:ENTPD2
Cluster 3	GO_bp	GO_POSITIVE_REGULATION_OF_SIGNALING	1759	101	66.8056	1.498e-05	0.00964136	MACF1:BMP8A:IQGAP3:FCRL3:SELP:G0S2:NENF:BAMBI:HRAS:DRD4:ARHGAP1:NR1H3:MADD:PSMC3:RAPSN:C1QTNF4:PTPRJ:NRGN:CACNB3:WNT10B:WNT1:P2RX7:P2RX4:GSKIP:APOPT1:PPP1R13B:RNF111:ANXA2:NEO1:AKAP13:IGF1R:ERN2:CHP2:PRKCB:ADORA2B:UBB:ITGB3:ITGB3:SEPT4:ERN1:CDH2:RIT2:BAX:TRPM4:FPR2:FAM110C:FAM150B:DNAJC27:IL1R1:INHBB:BMPR2:CD28:OXT:SLA2:MMP9:NTSR1:GID8:RTN4R:OSM:HMOX1:GRAP2:OXTR:RAF1:CCR1:PROK2:ACPP:NCK1:P2RY12:M…
Cluster 3	GO_bp	GO_PLATELET_ACTIVATION	150	18	5.6969	1.5741e-05	0.00964136	PEAR1:SELP:FERMT3:UBASH3B:VWF:CLEC1B:PRKCB:ITGA2B:ITGB3:ITGB3:MYL9:RAF1:P2RY12:PF4V1:LCP2:TREML1:NOS3:TLN1:ENTPD2
Cluster 3	GO_bp	GO_REGULATION_OF_IMMUNE_SYSTEM_PROCESS	1437	85	54.5763	2.67454e-05	0.0151215	AKIRIN1:FCRL3:CD247:SELP:TNFSF4:IFITM1:HRAS:NR1H3:SPI1:PSMC3:PTPRJ:UBASH3B:CLEC4A:ANO6:CACNB3:P2RX7:P2RX4:ZFP36L1:FOS:RPS6KA5:SPPL2A:ADAM10:RORA:DNASE1:PRKCB:ATXN1L:ADORA2B:UBB:ITGA2B:BAIAP2:PIK3C3:CD22:CD79A:BAX:TRPM4:FPR2:MEIS1:IL1R1:HSPD1:CD28:IGFBP2:SIRPA:MYL9:SLA2:MAFB:CEBPB:HMOX1:GRAP2:TNRC6B:PPARG:RAF1:CCR1:PROS1:NCK1:IL20RB:P2RY12:EIF2B5:PSMD2:BCL6:MUC20:MUC4:KIT:IL8:CXCL6:BANK1:UBE2D3:PD…
Cluster 3	GO_bp	GO_LIPID_LOCALIZATION	385	32	14.622	2.98005e-05	0.0156452	ANO9:DRD4:NR1H3:ANO6:P2RX7:P2RX4:AQP9:LIPC:ANXA2:NCOR1:ACACA:ITGB3:ITGB3:ABCC3:NCOA1:POMC:ACSL3:OXT:ATP9A:NTSR1:ABCG1:OSBP2:PPARG:SLC51A:SPP1:EGF:FABP2:FBXW7:BMP6:NPC1L1:CROT:CLU:ABCA1
Cluster 3	GO_bp	GO_REGULATION_OF_INTRACELLULAR_SIGNAL_TRANSDUCTION	1756	99	66.6917	3.80864e-05	0.0186623	BMP8A:IQGAP3:FCRL3:SELP:NENF:HRAS:DRD4:ARHGAP1:MADD:NDUFS3:PTPMT1:C1QTNF4:PTPRJ:MRE11A:PRKAG1:C1QL4:P2RX7:P2RX4:NDRG2:PLEKHG3:MARK3:BAG5:PPP1R13B:RORA:HOMER2:AKAP13:IGF1R:TRAP1:ERN2:CHP2:PRKCB:GPR97:MARVELD3:PHLPP2:RPA1:ADORA2B:NCOR1:UBB:CDK5R1:SEPT4:ERN1:CDH2:RIT2:NDUFA13:CD22:BCL3:BAX:HRC:FPR2:FAM110C:FAM150B:DNAJC27:RNF149:INHBB:ARHGAP15:CD28:SIRPA:PHF20:SLA2:FAM83D:MMP9:RTN4R:OSM:DUSP18:HMOX1…
Cluster 3	GO_bp	GO_APOPTOTIC_SIGNALING_PATHWAY	579	42	21.99	4.76488e-05	0.0199963	G0S2:SRGN:HRAS:MADD:NDUFS3:PTPMT1:CTTN:P2RX7:P2RX4:GSKIP:BAG5:APOPT1:PPP1R13B:ST20:TRAP1:ERN2:UBB:SEPT4:ERN1:NDUFA13:BCL3:BAX:INHBB:CD28:MMP9:CEBPB:DIDO1:C22orf29:HMOX1:RAF1:CCK:NCK1:SKIL:FBXW7:CTNNA1:CD14:CDKN1A:FOXO3:NOS3:CLU:POLB:GSN
Cluster 3	GO_bp	GO_REGULATION_OF_TRANSPORT	1767	99	67.1094	4.85586e-05	0.0199963	BMP8A:PPT1:FCRL3:DNM3:TNFSF4:CNST:SRGN:ANO9:HRAS:DRD4:CD151:ARHGAP1:PACSIN3:NR1H3:MYBPC3:C1QTNF4:PTPRJ:PANX1:UBASH3B:ANO6:CACNB3:P2RX7:P2RX4:CLDN10:RAB20:PPP1R13B:ANXA2:HOMER2:MEF2A:CHP2:PRKCB:ADORA2B:NCOR1:TRPV2:CDK5R1:ITGB3:ITGB3:SEPT4:RAB31:CDH2:PIK3C3:RIT2:CD22:RTN2:BAX:HRC:TRPM4:DNAJC27:POMC:HK2:IL1R2:INHBB:HECW2:ACSL3:SIRPA:VPS16:OXT:MMP9:CEBPB:NTSR1:ABCG1:SEPT5:COMT:OSM:HMOX1:MCHR1:OXTR:PP…
Cluster 3	GO_bp	GO_REGULATION_OF_LIPID_LOCALIZATION	134	16	5.08923	4.89705e-05	0.0199963	NR1H3:P2RX7:P2RX4:ANXA2:NCOR1:ITGB3:ITGB3:POMC:OXT:NTSR1:ABCG1:PPARG:SPP1:EGF:FBXW7:BMP6:ABCA1
Cluster 3	GO_bp	GO_NEGATIVE_REGULATION_OF_MULTICELLULAR_ORGANISMAL_PROCESS	1152	70	43.7522	6.35484e-05	0.0229402	AKIRIN1:DNM3:TNFSF4:SRGN:SIGIRR:CEND1:LRP4:NR1H3:UBASH3B:CLEC4A:CACNB3:WNT10B:P2RX7:P2RX4:NDRG2:ZFP36L1:RPS6KA5:BAG5:ANXA2:HOMER2:IRX3:MARVELD3:ADORA2B:CDK5R1:RIT2:BCL3:TRPM4:POMC:MEIS1:IL1R2:INHBB:DLX1:PLCL1:BMPR2:SIRPA:OXT:MAFB:MMP9:COMT:RTN4R:HMOX1:OXTR:PPARG:CCK:CCR1:STAB1:PROS1:IL20RB:CHRD:BCL6:SPP1:BANK1:PDE5A:FBXW7:TLR2:GUCY1A3:ISL1:MEF2C:LNPEP:CTNNA1:WWC1:DAAM2:FOXO3:ARG1:TMEM176B:TMEM176…
Cluster 3	GO_bp	GO_POSITIVE_REGULATION_OF_CELL_DEATH	664	46	25.2183	6.41524e-05	0.0229402	G0S2:RAPSN:MTCH2:ANO6:WNT10B:P2RX7:FOS:APOPT1:PPP1R13B:ADAM10:ST20:AKAP13:DHODH:HP:HPR:UBB:CDK5R1:SEPT4:NDUFA13:BAX:NCOA1:INHBB:HSPD1:HSPE1:MMP9:NTSR1:COL18A1:HMOX1:PPARG:CCK:NCK1:SKIL:EIF2B5:EIF4G1:BCL6:FBXW7:MEF2C:CTNNA1:CDKN1A:FOXO3:HEBP2:RAMP3:ZNF746:CLU:TP53INP1:GSN
Cluster 3	GO_bp	GO_INTERLEUKIN_1_ALPHA_PRODUCTION	7	4	0.265855	6.55435e-05	0.0229402	PANX1:P2RX7:IL1R2:ISL1
Cluster 3	GO_bp	GO_MYELOID_LEUKOCYTE_ACTIVATION	630	44	23.927	7.66522e-05	0.0240071	PPIE:NR1H3:SPI1:PSMC3:PTPRJ:ANO6:DNAJC3:ADAM10:ANXA2:RORA:DNASE1:ITGAX:GPR97:HP:ADORA2B:RAB31:CEACAM3:FPR2:YPEL5:QPCT:HSPD1:SIRPA:SLPI:MMP9:HMOX1:DYNC1LI1:ACPP:MME:PSMD2:KIT:IL8:CXCL6:CXCL1:PPBP:TLR2:CD14:LCP2:ARG1:HEBP2:PPIA:AOC1:CLU:NDRG1:GSN
Cluster 3	GO_bp	GO_NEGATIVE_REGULATION_OF_MACROPHAGE_DERIVED_FOAM_CELL_DIFFERENTIATION	13	5	0.493731	7.7282e-05	0.0240071	NR1H3:ITGB3:ITGB3:ABCG1:PPARG:ABCA1
Cluster 3	GO_bp	GO_POSITIVE_REGULATION_OF_LIPID_TRANSPORT	60	10	2.27876	7.83904e-05	0.0240071	NR1H3:P2RX7:P2RX4:ANXA2:OXT:NTSR1:ABCG1:SPP1:BMP6:ABCA1
Cluster 3	GO_bp	GO_REGULATION_OF_CALCIUM_ION_TRANSPORT	234	22	8.88716	8.79438e-05	0.0258555	FCRL3:DRD4:PACSIN3:UBASH3B:CACNB3:P2RX7:P2RX4:ANXA2:HOMER2:TRPV2:BAX:HRC:NTSR1:MCHR1:CCR1:MYLK:P2RY12:EGF:CAMK2B:RAMP3:NOS3:TMEM38B
Cluster 3	GO_bp	GO_REGULATION_OF_PHOSPHORUS_METABOLIC_PROCESS	1612	90	61.2227	0.000125325	0.0329576	SPOCD1:BMP8A:CKS1B:SMG5:IQGAP3:FCRL3:NENF:CNST:MASTL:NRBF2:HRAS:DRD4:LRP4:MADD:PTPRJ:MRE11A:UBASH3B:WNT1:PRKAG1:C1QL4:P2RX7:CAMKK2:CDK2AP1:DNAJC3:NDRG2:RPS6KA5:GSKIP:CCNB2:ANXA2:AKAP13:IGF1R:ERN2:CHP2:MARVELD3:ADORA2B:NCOR1:UBB:CDK5R1:ITGB3:ITGB3:ERN1:CDH2:RIT2:BAX:HRC:FPR2:FAM150B:ADCY3:DNAJC27:RNF149:INHBB:PLCL1:BMPR2:SIRPA:SLA2:FAM83D:MMP9:OSM:DUSP18:RAF1:CTDSPL:ULK4:CCK:CCR1:PROK2:PPP2R3A:NCK…
Cluster 3	GO_bp	GO_NEGATIVE_REGULATION_OF_CHOLESTEROL_STORAGE	8	4	0.303835	0.000127146	0.0329576	NR1H3:ABCG1:PPARG:ABCA1
Cluster 3	GO_bp	GO_REGULATION_OF_SENSORY_PERCEPTION	41	8	1.55715	0.000129629	0.0329576	CACNB3:OXT:NTSR1:COMT:CCK:MGLL:ACPP:NOV
Cluster 3	GO_bp	GO_PURINERGIC_RECEPTOR_SIGNALING_PATHWAY	31	7	1.17736	0.000130037	0.0329576	ANO6:P2RX7:P2RX4:ADORA2B:ACPP:P2RY13:P2RY12
Cluster 3	GO_bp	GO_POSITIVE_REGULATION_OF_TRANSPORT	929	58	35.2828	0.000135194	0.0331225	PPT1:DNM3:TNFSF4:CNST:HRAS:DRD4:CD151:NR1H3:C1QTNF4:PTPRJ:PANX1:ANO6:CACNB3:P2RX7:P2RX4:PPP1R13B:ANXA2:MEF2A:CHP2:ADORA2B:TRPV2:CDK5R1:RAB31:CDH2:BAX:TRPM4:INHBB:ACSL3:SIRPA:OXT:CEBPB:NTSR1:ABCG1:OSM:MCHR1:OXTR:PPARG:CCK:CCR1:MYLK:P2RY12:IL1RAP:SPP1:UBE2D3:EGF:FBXW7:TLR2:ISL1:CD14:ABLIM3:BMP6:PPIA:RAMP3:KCNH2:BLK:CLU:ADCY8:ABCA1
Cluster 3	GO_bp	GO_IMMUNE_RESPONSE_REGULATING_CELL_SURFACE_RECEPTOR_SIGNALING_PATHWAY	365	29	13.8624	0.000152748	0.0343925	FCRL3:CD247:HRAS:PSMC3:PTPRJ:CLEC4A:CACNB3:FOS:RPS6KA5:PRKCB:BAIAP2:CD22:CD79A:BAX:FPR2:CD28:SLA2:GRAP2:RAF1:NCK1:EIF2B5:PSMD2:MUC20:MUC4:KIT:MEF2C:LCP2:ELMO1:BLK
Cluster 3	GO_bp	GO_SENSORY_PERCEPTION_OF_PAIN	104	13	3.94985	0.000153809	0.0343925	CACNB3:P2RX7:P2RX4:OXT:NTSR1:COMT:CCK:PROK2:MGLL:ACPP:MME:LXN:NOV
Cluster 3	GO_bp	GO_INTRINSIC_APOPTOTIC_SIGNALING_PATHWAY	278	24	10.5582	0.000161952	0.0343925	HRAS:NDUFS3:PTPMT1:GSKIP:BAG5:APOPT1:PPP1R13B:TRAP1:ERN2:UBB:SEPT4:ERN1:NDUFA13:BCL3:BAX:MMP9:CEBPB:HMOX1:NCK1:SKIL:FBXW7:CDKN1A:CLU:POLB
Cluster 3	GO_bp	GO_NEGATIVE_REGULATION_OF_SIGNALING	1296	75	49.2212	0.000162759	0.0343925	DHRS3:BMP8A:PEAR1:FCRL3:RGS18:BAMBI:SIGIRR:LRP4:NR1H3:PSMC3:NDUFS3:PTPRJ:CTTN:UBASH3B:WNT1:C1QL4:P2RX7:NDRG2:MARK3:BAG5:KIF26A:RORA:RBPMS2:HOMER2:IGF1R:TRAP1:PRKCB:GPR97:MARVELD3:PHLPP2:NCOR1:UBB:CDH2:NDUFA13:CD22:BCL3:BAX:RNF149:IL1R2:INHBB:DLX1:IGFBP2:SIRPA:SLA2:MMP9:OSM:DUSP18:HMOX1:PPARG:RAF1:NCK1:SKIL:DVL3:PSMD2:CHRD:BCL6:IL8:BANK1:EGF:MYOZ2:FBXW7:ISL1:RGS7BP:CTNNA1:CD14:WWC1:FOXO3:ARG1:PTPN…
Cluster 3	GO_bp	GO_CELLULAR_RESPONSE_TO_OXYGEN_CONTAINING_COMPOUND	1083	65	41.1316	0.000165944	0.0343925	TNFSF4:SIGIRR:NR1H3:SPI1:WNT10B:WNT1:P2RX7:P2RX4:CAMKK2:ZFP36L1:FOS:AQP9:RORA:IGF1R:TRAP1:PRKCB:CDK5R1:ACACA:ERN1:BAIAP2:LPIN2:RAB31:NDUFA13:TRPM4:FPR2:ADCY3:INHBB:SIRPA:PTPRA:SLA2:SOGA1:MMP9:CEBPB:PPARG:RAF1:NCK1:P2RY12:IL8:CXCL6:PF4V1:CXCL1:PPBP:CXCL5:SPP1:GAB1:TLR2:GUCY1B3:MEF2C:CTNNA1:CD14:BMP6:FOXO3:ARG1:NME8:RAMP3:NCF1:PRKAR2B:CAV2:AOC1:NOS3:CLU:TP53INP1:TRIB1:ADCY8:ABCA1
Cluster 3	GO_bp	GO_SIGNAL_TRANSDUCTION_BY_PROTEIN_PHOSPHORYLATION	917	57	34.827	0.000173002	0.0343925	BMP8A:IQGAP3:FCRL3:NENF:HRAS:DRD4:MADD:PSMC3:PTPRJ:CLEC1B:C1QL4:P2RX7:CAMKK2:NDRG2:ZFP36L1:MARK3:AKAP13:IGF1R:MEF2A:ERN2:MARVELD3:ADORA2B:NCOR1:UBB:ERN1:CDH2:RIT2:FPR2:FAM150B:DNAJC27:RNF149:INHBB:SIRPA:PTPRA:FAM83D:OSM:DUSP18:OXTR:RAF1:ULK4:CCR1:PROK2:DVL3:PSMD2:MUC20:KIT:BANK1:EGF:PDE5A:FBXW7:MEF2C:WWC1:BMP6:RAMP3:NCF1:CAV2:TRIB1
Cluster 3	GO_bp	GO_CALCIUM_MEDIATED_SIGNALING	212	20	8.05161	0.000173132	0.0343925	SELP:PTPRJ:P2RX7:P2RX4:CAMKK2:HOMER2:CHP2:SAMD14:RIT2:CD22:HRC:TRPM4:FPR2:SLA2:CCR1:P2RY12:IL8:MYOZ2:MCTP1:TMEM38B
Cluster 3	GO_bp	GO_IMMUNE_RESPONSE_REGULATING_SIGNALING_PATHWAY	521	37	19.7872	0.00020261	0.0391891	FCRL3:CD247:HRAS:NR1H3:PSMC3:PTPRJ:CLEC4A:CACNB3:FOS:RPS6KA5:PRKCB:UBB:BAIAP2:PIK3C3:CD22:CD79A:BAX:FPR2:HSPD1:CD28:SLA2:GRAP2:RAF1:NCK1:IL20RB:EIF2B5:PSMD2:MUC20:MUC4:KIT:UBE2D3:TLR2:MEF2C:CD14:LCP2:ELMO1:BLK
Cluster 3	GO_bp	GO_REGULATION_OF_MAPK_CASCADE	719	47	27.3071	0.000209605	0.0395026	BMP8A:IQGAP3:FCRL3:NENF:HRAS:DRD4:MADD:PTPRJ:C1QL4:P2RX7:NDRG2:AKAP13:IGF1R:ERN2:MARVELD3:ADORA2B:NCOR1:UBB:ERN1:CDH2:RIT2:FPR2:FAM150B:DNAJC27:RNF149:INHBB:SIRPA:FAM83D:OSM:DUSP18:RAF1:ULK4:CCR1:PROK2:DVL3:MUC20:KIT:BANK1:EGF:PDE5A:FBXW7:WWC1:BMP6:RAMP3:NCF1:CAV2:TRIB1
Cluster 3	GO_bp	GO_SECOND_MESSENGER_MEDIATED_SIGNALING	430	32	16.3311	0.000235968	0.0420282	SELP:PTPRJ:P2RX7:P2RX4:CAMKK2:HOMER2:AKAP13:CHP2:GPR97:ADORA2B:SAMD14:RIT2:CD22:HRC:TRPM4:FPR2:ADCY3:SLA2:CCR1:P2RY12:IL8:MYOZ2:PDE5A:GUCY1A3:GUCY1B3:MCTP1:RAMP3:PRKAR2B:NOS3:ADCY8:ABCA1:TMEM38B
Cluster 3	GO_bp	GO_LEUKOCYTE_MEDIATED_IMMUNITY	743	48	28.2186	0.000235979	0.0420282	PPIE:TNFSF4:PSMC3:PTPRJ:ANO6:P2RX7:DNAJC3:ADAM10:ANXA2:DNASE1:ITGAX:GPR97:HP:ADORA2B:RAB31:CEACAM3:BCL3:TRPM4:FPR2:YPEL5:QPCT:IL1R1:HSPD1:CD28:SIRPA:SLA2:SLPI:MMP9:HMOX1:DYNC1LI1:ACPP:IL20RB:MME:PSMD2:BCL6:RNF168:KIT:CXCL6:CXCL1:PPBP:TLR2:CD14:ARG1:HEBP2:PPIA:AOC1:CLU:GSN
Cluster 3	GO_bp	GO_DEFENSE_RESPONSE	1532	85	58.1843	0.000240161	0.0420282	TSPAN2:FCRL3:SELP:TNFSF4:IFITM2:IFITM1:IFITM3:SIGIRR:HRAS:DRD4:NR1H3:PSMC3:CLEC4A:CLEC1B:ANO6:OASL:P2RX7:DNAJC3:RAB20:FOS:RPS6KA5:RORA:DNASE1:HP:HPR:ADORA2B:UBB:PIK3C3:BCL3:FPR2:IL1R2:IL1R1:INHBB:HSPD1:CD28:SIRPA:SLPI:MMP9:CEBPB:OSM:HMOX1:PPARG:RAF1:CCK:CCR1:STAB1:PROK2:MGLL:IL20RB:LXN:ABCF3:PSMD2:EIF4G1:BCL6:IL1RAP:MUC20:MUC4:KIT:IL8:CXCL6:PF4V1:CXCL1:PPBP:CXCL5:SPP1:UBE2D3:TLR2:ISL1:MEF2C:CD14:…
Cluster 3	GO_bp	GO_RESPONSE_TO_OXYGEN_CONTAINING_COMPOUND	1559	86	59.2097	0.000265939	0.045457	SELP:TNFSF4:SIGIRR:DRD4:NR1H3:SPI1:PANX1:WNT10B:WNT1:P2RX7:P2RX4:CAMKK2:ZFP36L1:FOS:AQP9:RORA:HOMER2:IGF1R:TRAP1:PRKCB:DHODH:HP:CDK5R1:ACACA:ERN1:BAIAP2:LPIN2:RAB31:PIK3C3:NDUFA13:TRPM4:FPR2:NCOA1:ADCY3:INHBB:IGFBP2:SIRPA:PTPRA:OXT:SLA2:SOGA1:SLPI:MMP9:CEBPB:COL18A1:TXNRD2:COMT:HMOX1:OXTR:PPARG:RAF1:NCK1:P2RY12:EIF2B5:IL8:CXCL6:PF4V1:CXCL1:PPBP:CXCL5:SPP1:GAB1:TLR2:GUCY1B3:MEF2C:CTNNA1:CD14:BMP6:…
Cluster 3	GO_bp	GO_POSITIVE_REGULATION_OF_PHOSPHORUS_METABOLIC_PROCESS	1042	62	39.5744	0.000295889	0.0484649	BMP8A:CKS1B:IQGAP3:FCRL3:NENF:HRAS:DRD4:LRP4:MADD:PTPRJ:MRE11A:WNT1:PRKAG1:P2RX7:CAMKK2:CDK2AP1:RPS6KA5:ANXA2:AKAP13:IGF1R:ERN2:CHP2:ADORA2B:UBB:CDK5R1:ITGB3:ITGB3:ERN1:CDH2:RIT2:FPR2:FAM150B:ADCY3:DNAJC27:INHBB:BMPR2:MMP9:OSM:RAF1:CCK:CCR1:PROK2:P2RY12:DVL3:EIF4G1:MUC20:KIT:BANK1:EGF:PDE5A:FBXW7:ISL1:CKS1B:MEF2C:WWC1:LCP2:BMP6:CDKN1A:RAMP3:NCF1:PRKAR2B:CAV2:CLU:ADCY8
Cluster 3	GO_bp	GO_RESPONSE_TO_EXTRACELLULAR_STIMULUS	512	36	19.4454	0.000297394	0.0484649	BMP8A:NENF:PANX1:GABARAPL1:CACNB3:P2RX7:P2RX4:FOS:KIF26A:DHODH:ADORA2B:PIK3C3:TRPM4:NCOA1:POMC:INHBB:HAT1:BMPR2:IGFBP2:ACSL3:OXT:COMT:HMOX1:ADSL:PPARG:CCK:P2RY12:TBL1XR1:EIF4G1:SPP1:CDKN1A:FOXO3:ARG1:AOC1:ABCA1:GSN
Cluster 3	GO_bp	GO_ORGANIC_HYDROXY_COMPOUND_TRANSPORT	238	21	9.03908	0.000303318	0.0484649	DRD4:NR1H3:AQP9:LIPC:ANXA2:ABCC3:NCOA1:POMC:OXT:ABCG1:OSBP2:OXTR:PPARG:P2RY12:SLC51A:SPP1:EGF:BMP6:NPC1L1:CLU:ABCA1
Cluster 3	GO_bp	GO_ENDOCYTOSIS	533	37	20.243	0.000315443	0.0490235	PPT1:PEAR1:DNM3:HRAS:DRD4:CD151:LRP4:PACSIN3:NR1H3:CTTN:ANO6:LMBR1L:RAB20:ANXA2:HP:HPR:ITGB3:ITGB3:RAB31:PIK3C3:RIT2:CD22:FPR2:ATP9A:PPARG:STAB1:AP2M1:IL8:EGF:MCTP1:CD14:PACSIN1:ELMO1:RAMP3:CAV2:CLU:ABCA1:GSN
Cluster 3	GO_bp	GO_IMPORT_INTO_CELL	672	44	25.5221	0.000320154	0.0490235	PPT1:PEAR1:DNM3:HRAS:DRD4:CD151:LRP4:PACSIN3:NR1H3:CTTN:SLC36A4:ANO6:LMBR1L:RAB20:ANXA2:HP:HPR:ITGB3:ITGB3:RAB31:PIK3C3:RIT2:CD22:TRPM4:FPR2:ACSL3:ATP9A:NTSR1:SLC19A1:PPARG:STAB1:AP2M1:IL8:SLC39A8:EGF:MCTP1:CD14:PACSIN1:ELMO1:RAMP3:CAV2:KCNH2:CLU:ABCA1:GSN
Cluster 3	GO_cc	GO_PLATELET_ALPHA_GRANULE	89	16	3.38016	2.07276e-07	0.000207483	F5:SELP:CYB5R1:SRGN:FERMT3:VWF:ITGA2B:ITGB3:ITGB3:PROS1:PPBP:MMRN1:EGF:F13A1:TREML1:CLU:TIMP1
Cluster 3	GO_cc	GO_SECRETORY_GRANULE	822	58	31.219	4.10528e-06	0.00205469	PPIE:F5:SELP:CYB5R1:ENKUR:SRGN:PSMC3:PTPRJ:FERMT3:VWF:ANO6:DNAJC3:ADAM10:ANXA2:ITGAX:GPR97:HP:ITGA2B:ITGB3:ITGB3:RAB31:CEACAM3:PPFIA3:FPR2:POMC:YPEL5:QPCT:HSPD1:ICA1L:SIRPA:OXT:PCSK2:SLPI:MMP9:DYNC1LI1:PROS1:ACPP:MME:SKIL:PSMD2:KIT:CXCL1:PPBP:MMRN1:EGF:TLR2:PCSK1:CTNNA1:CD14:F13A1:TREML1:ARG1:HEBP2:PPIA:CAV2:AOC1:CLU:GSN:TIMP1
Cluster 3	GO_cc	GO_SECRETORY_VESICLE	972	65	36.9159	6.30493e-06	0.00210375	PPIE:PPT1:F5:SELP:CYB5R1:ENKUR:SRGN:PSMC3:PTPRJ:FERMT3:VWF:ANO6:DNAJC3:ADAM10:ANXA2:ITGAX:GPR97:HP:ITGA2B:ITGB3:ITGB3:SEPT4:RAB31:CEACAM3:NTF4:PPFIA3:FPR2:POMC:YPEL5:QPCT:SLC40A1:HSPD1:ICA1L:SIRPA:OXT:PCSK2:SLPI:MMP9:SEPT5:DYNC1LI1:PROS1:ACPP:MME:SKIL:PSMD2:KIT:CXCL1:PPBP:MMRN1:EGF:TLR2:MCTP1:PCSK1:CTNNA1:CD14:F13A1:TREML1:ARG1:HEBP2:SYTL3:PPIA:CAV2:AOC1:CLU:GSN:TIMP1
Cluster 3	GO_cc	GO_PLATELET_ALPHA_GRANULE_LUMEN	67	11	2.54461	4.00904e-05	0.0100326	F5:SRGN:FERMT3:VWF:PROS1:PPBP:MMRN1:EGF:F13A1:CLU:TIMP1
Cluster 3	GO_cc	GO_CELL_BODY	552	40	20.9646	7.34806e-05	0.0147108	PPT1:PTPRF:APOA1BP:LRP4:NRGN:GABARAPL1:DDN:P2RX7:P2RX4:CKB:MAP1A:ADAM10:HOMER2:DHODH:UBB:TRPV2:CDK5R1:RIT2:CD22:TRPM4:CRIPT:MOB4:BMPR2:VPS16:PCSK2:NTSR1:COMT:RTN4R:CCK:P2RY12:MME:KLHL24:TLR2:ARG1:PACRG:NCF1:PRKAR2B:NOV:ADCY8:OLFM1
Cluster 3	GO_cc	GO_CELL_SURFACE	771	50	29.282	0.000160291	0.0267419	TNFRSF9:FCRL3:MPZL1:SELP:TNFSF4:CD151:LRP4:PTPRJ:MS4A1:ANO6:WNT1:P2RX7:SLITRK6:ADAM10:ANXA2:PCSK6:ITGAX:TRPV2:ITGA2B:ITGB3:ITGB3:CDH2:LPAR2:CD22:CD79A:IL1R1:HSPD1:BMPR2:CD28:SIRPA:APMAP:HM13:NTSR1:ABCG1:RTN4R:CCR1:ITGB5:P2RY12:MME:KIT:ANTXR2:TLR2:CD14:SCUBE3:TREML1:RAMP3:TSPAN33:KCNH2:CLU:TLN1:ABCA1
Cluster 3	GO_cc	GO_VESICLE_LUMEN	335	27	12.7231	0.000202449	0.0289503	PPIE:F5:SRGN:PSMC3:FERMT3:VWF:DNAJC3:ANXA2:HP:POMC:QPCT:SLPI:PROS1:PSMD2:CXCL1:PPBP:MMRN1:EGF:PCSK1:F13A1:ARG1:HEBP2:PPIA:AOC1:CLU:GSN:TIMP1
Cluster 3	GO_cc	GO_CYTOPLASMIC_VESICLE_PART	1446	81	54.9181	0.000251684	0.031492	PPIE:YIPF1:F5:SELP:CYB5R1:SRGN:IFITM3:ARHGAP1:PSMC3:PTPRJ:FERMT3:NRGN:VWF:GABARAPL1:ANO6:WNT1:DNAJC3:RAB20:SPPL2A:ADAM10:ANXA2:GDE1:GGA2:ITGAX:GPR97:HP:UBB:ITGA2B:ITGB3:ITGB3:ENTHD2:RAB31:PIK3C3:COPE:CEACAM3:FPR2:POMC:YPEL5:QPCT:SIRPA:VPS16:SLA2:SLPI:MMP9:ATP9A:ZDHHC8:DYNC1LI1:STAB1:PROS1:ACPP:MME:AP2M1:ECE2:PSMD2:ACAP2:CXCL1:PPBP:ANTXR2:MMRN1:UBE2D3:EGF:SEC24D:TLR2:MCTP1:PCSK1:LNPEP:CD14:F13A1:P…
Cluster 4	Canonical_Pathways	REACTOME_ACTIVATION_OF_HOX_GENES_DURING_DIFFERENTIATION	118	12	2.36715	4.39521e-06	0.00966506	RBBP4:HOXB1:HOXB2:HOXB3:HOXB4:RQCD1:MAFB:POLR2F:HIST1H2BD:HIST1H4D:HIST1H3D:HIST1H2BK
Cluster 4	Canonical_Pathways	REACTOME_PLASMA_LIPOPROTEIN_ASSEMBLY	19	5	0.381151	2.88259e-05	0.0165575	APOA4:APOC3:APOA1:APOE:APOC1
Cluster 4	Canonical_Pathways	REACTOME_CHYLOMICRON_ASSEMBLY	10	4	0.200606	3.01183e-05	0.0165575	APOA4:APOC3:APOA1:APOE
Cluster 4	Canonical_Pathways	REACTOME_CHYLOMICRON_REMODELING	10	4	0.200606	3.01183e-05	0.0165575	APOA4:APOC3:APOA1:APOE
Cluster 4	GO_bp	GO_PHOSPHOLIPID_EFFLUX	12	5	0.240727	2.20412e-06	0.0162003	APOA4:APOC3:APOA1:APOE:APOC1
Cluster 4	GO_bp	GO_RHOMBOMERE_DEVELOPMENT	7	4	0.140424	5.26541e-06	0.0193504	HOXB1:HOXB2:HOXB3:MAFB
Cluster 4	GO_bp	GO_HIGH_DENSITY_LIPOPROTEIN_PARTICLE_REMODELING	16	5	0.32097	1.13781e-05	0.0269906	APOA4:APOC3:APOA1:APOE:APOC1
Cluster 4	GO_bp	GO_POSITIVE_REGULATION_OF_CHOLESTEROL_ESTERIFICATION	9	4	0.180545	1.83609e-05	0.0269906	APOA4:APOA1:APOE:APOC1
Cluster 4	GO_bp	GO_CHYLOMICRON_REMODELING	9	4	0.180545	1.83609e-05	0.0269906	APOA4:APOC3:APOA1:APOE
Cluster 4	GO_bp	GO_CHYLOMICRON_ASSEMBLY	10	4	0.200606	3.01183e-05	0.0368949	APOA4:APOC3:APOA1:APOE
Cluster 4	GO_bp	GO_REGULATION_OF_CHOLESTEROL_ESTERIFICATION	11	4	0.220667	4.65817e-05	0.042797	APOA4:APOA1:APOE:APOC1
Cluster 4	GO_bp	GO_VERY_LOW_DENSITY_LIPOPROTEIN_PARTICLE_REMODELING	11	4	0.220667	4.65817e-05	0.042797	APOA4:APOC3:APOA1:APOE
Cluster 4	GO_cc	GO_CHYLOMICRON	13	5	0.260788	3.52292e-06	0.00352644	APOA4:APOC3:APOA1:APOE:APOC1
Cluster 4	GO_cc	GO_TRIGLYCERIDE_RICH_PLASMA_LIPOPROTEIN_PARTICLE	19	5	0.381151	2.88259e-05	0.0144274	APOA4:APOC3:APOA1:APOE:APOC1
Cluster 4	GO_cc	GO_INTERMEDIATE_DENSITY_LIPOPROTEIN_PARTICLE	5	3	0.100303	7.7138e-05	0.0193038	APOC3:APOA1:APOE
Cluster 4	GO_cc	GO_ENDOLYSOSOME_LUMEN	5	3	0.100303	7.7138e-05	0.0193038	CTSS:CTSK:CTSB
Cluster 4	GO_cc	GO_HIGH_DENSITY_LIPOPROTEIN_PARTICLE	26	5	0.521576	0.000145312	0.0290915	APOA4:APOC3:APOA1:APOE:APOC1
Cluster 4	GO_mf	GO_PHOSPHATIDYLCHOLINE_STEROL_O_ACYLTRANSFERASE_ACTIVATOR_ACTIVITY	6	4	0.120364	2.29288e-06	0.00377179	APOA4:APOA1:APOE:APOC1
Cluster 4	GO_mf	GO_STEROL_BINDING	56	8	1.12339	1.46574e-05	0.0120557	APOA4:APOC3:APOA1:RORA:OSBPL7:NFE2L1:APOE:SCAP
Cluster 5	Canonical_Pathways	REACTOME_CYTOKINE_SIGNALING_IN_IMMUNE_SYSTEM	824	76	30.4771	1.52717e-13	3.35825e-10	TNFRSF14:TNFRSF25:IFNLR1:JUN:IL12RB2:GBP1:GBP2:GBP5:FCGR1B:FCGR1A:MCL1:PTGS2:IL15RA:VIM:RASGEF1A:BLNK:TRIM8:TRIM21:UBE2L6:IL18BP:CASP1:NCAM1:VWF:KRAS:BRAP:PTPN11:OAS2:FGF9:PSME1:PSME2:FOS:RPS6KA5:ANXA2:TNFRSF17:NOD2:PSMB10:IRF8:TNFRSF13B:PSMB3:STAT5A:DUSP3:KPNB1:BCL2:FCER2:ICAM1:IL18R1:IL18RAP:PTPN4:STAT1:STAT4:SRC:PLCG1:MMP9:LAMA5:TNFRSF6B:IL2RB:TNFRSF13C:CCR1:UBA7:IL1RAP:CXCL10:NFKB1:EGF:RAPGEF…
Cluster 5	Canonical_Pathways	REACTOME_SIGNALING_BY_INTERLEUKINS	623	57	23.0427	2.76527e-10	3.04041e-07	IFNLR1:JUN:IL12RB2:MCL1:PTGS2:IL15RA:VIM:RASGEF1A:BLNK:IL18BP:CASP1:NCAM1:VWF:KRAS:BRAP:PTPN11:FGF9:PSME1:PSME2:FOS:RPS6KA5:ANXA2:NOD2:PSMB10:PSMB3:STAT5A:DUSP3:BCL2:FCER2:ICAM1:IL18R1:IL18RAP:PTPN4:STAT1:STAT4:SRC:MMP9:LAMA5:IL2RB:CCR1:IL1RAP:CXCL10:NFKB1:EGF:RAPGEF2:PIK3R1:RASGRF2:MEF2C:FGFR4:IRF4:HIST1H3H:MAPK14:VEGFA:PTPN12:RIPK2:IL11RA:ANXA1
Cluster 5	Canonical_Pathways	PID_IL12_2PATHWAY	60	14	2.2192	2.77769e-08	2.03605e-05	MTOR:IL12RB2:FOS:STAT5A:GADD45B:CD8A:IL18R1:IL18RAP:STAT1:STAT4:IL2RB:NFKB1:MAPK14:RIPK2
Cluster 5	Canonical_Pathways	REACTOME_ADAPTIVE_IMMUNE_SYSTEM	719	57	26.5935	4.96595e-08	2.29511e-05	TNFRSF14:MTOR:FCGR1B:FCGR1A:FCGR2B:SH2D1B:SFTPD:BLNK:ACTR1A:TRIM21:NCR3LG1:UBE2L6:AMICA1:LAG3:KLRB1:KRAS:TUBA1A:PTPN11:PSME1:PSME2:HERC2:PSMB10:PSMB3:CD79B:ICAM2:TUBB6:ICAM1:CD22:CD79A:SIGLEC6:CD8A:KIF3B:SRC:PLCG1:CTSA:DYNC1LI1:UBA7:DZIP3:BTLA:TRPC1:NFKB1:FYB:PIK3R1:KLHL3:ITK:MYLIP:BTN3A1:BTN3A3:TREM1:UBE2J1:BLK:WWP1:RIPK2:CD274:PDCD1LG2:CD99:UBE2A
Cluster 5	Canonical_Pathways	PID_ERBB1_DOWNSTREAM_PATHWAY	105	18	3.88361	5.21852e-08	2.29511e-05	MTOR:JUN:KRAS:FOS:RPS6KA5:PRKCA:BAIAP2:YWHAQ:NCKAP1:STAT1:SRC:YWHAH:PLD1:EGF:PIK3R1:MEF2C:CYFIP2:RALGDS
Cluster 5	Canonical_Pathways	PID_PDGFRB_PATHWAY	129	19	4.77129	2.71133e-07	9.93702e-05	JUN:KRAS:PTPN11:FOS:STAT5A:PRKCA:SPHK1:BAIAP2:JUND:YWHAQ:NCKAP1:STAT1:SRC:PLCG1:YWHAH:PIK3R1:CYFIP2:GRB10:BLK
Cluster 5	Canonical_Pathways	REACTOME_INTERFERON_GAMMA_SIGNALING	72	14	2.66304	3.17544e-07	9.97542e-05	GBP1:GBP2:GBP5:FCGR1B:FCGR1A:TRIM8:TRIM21:NCAM1:PTPN11:OAS2:IRF8:ICAM1:STAT1:IRF4
Cluster 5	Canonical_Pathways	PID_FGF_PATHWAY	55	12	2.03427	5.99017e-07	0.000164655	JUN:NCAM1:PTPN11:FGF9:FOS:CDH2:STAT1:SRC:PLCG1:MMP9:PIK3R1:FGFR4
Cluster 5	Canonical_Pathways	PID_EPO_PATHWAY	33	9	1.22056	2.11354e-06	0.000516407	SH2B3:PTPN11:STAT5A:BCL2:STAT1:PLCG1:NFKB1:PIK3R1:MAPK14
Cluster 5	Canonical_Pathways	REACTOME_SIGNALING_BY_SCF_KIT	43	10	1.59043	2.81558e-06	0.000619145	KRAS:SH2B3:PTPN11:STAT5A:PRKCA:STAT1:SRC:MMP9:PIK3R1:GRB10
Cluster 5	Canonical_Pathways	BIOCARTA_EGF_PATHWAY	27	8	0.998642	3.96061e-06	0.000791763	JUN:FOS:STAT5A:PRKCA:STAT1:PLCG1:EGF:PIK3R1
Cluster 5	Canonical_Pathways	REACTOME_INNATE_IMMUNE_SYSTEM	1022	65	37.8004	1.33381e-05	0.00244421	MASP2:C1QB:JUN:CD58:FCGR1A:AIM2:C4BPA:CD55:CR2:CD46:SFTPD:TRIM21:UBE2L6:SERPING1:CASP1:KRAS:HVCN1:PTPN11:SLC15A4:PSME1:PSME2:FOS:RPS6KA5:ANXA2:CPPED1:NOD2:NLRC5:PSMB10:PSMB3:DUSP3:KPNB1:ICAM2:TMC6:BAIAP2:BCL2:CD97:PGLYRP1:PTPN4:NCKAP1:CAB39:LRRFIP1:SRC:PLCG1:CTSA:MMP9:DNAJC5:DYNC1LI1:UBA7:PLD1:TXK:NFKB1:PIK3R1:IQGAP2:MEF2C:ITK:CYFIP2:RAB24:TXNDC5:MAPK14:TREM1:POLR1C:RIPK2:GSDMD:GSN:FRMPD3
Cluster 5	Canonical_Pathways	BIOCARTA_TPO_PATHWAY	24	7	0.887682	1.81779e-05	0.00307486	JUN:FOS:STAT5A:PRKCA:STAT1:PLCG1:PIK3R1
Cluster 5	Canonical_Pathways	PID_BETA_CATENIN_NUC_PATHWAY	78	12	2.88496	2.72766e-05	0.00418074	JUN:TCF7L2:CCND2:AXIN2:TCF4:YWHAQ:MMP9:YWHAH:LEF1:VCAN:MDFIC:KLF4
Cluster 5	Canonical_Pathways	PID_IL2_1PATHWAY	55	10	2.03427	2.87927e-05	0.00418074	JUN:KRAS:PTPN11:FOS:STAT5A:BCL2:STAT1:IL2RB:PIK3R1:MAPK14
Cluster 5	Canonical_Pathways	BIOCARTA_CARDIACEGF_PATHWAY	18	6	0.665761	3.15284e-05	0.00418074	JUN:FOS:PRKCA:PLCG1:NFKB1:EGF
Cluster 5	Canonical_Pathways	PID_ERBB1_RECEPTOR_PROXIMAL_PATHWAY	35	8	1.29454	3.23204e-05	0.00418074	KRAS:PTPN11:STAT1:SRC:PLCG1:EGF:PIK3R1:GSN
Cluster 5	Canonical_Pathways	REACTOME_INTERLEUKIN_4_AND_INTERLEUKIN_13_SIGNALING	107	14	3.95758	3.92556e-05	0.00465496	MCL1:PTGS2:VIM:FOS:BCL2:FCER2:ICAM1:STAT1:MMP9:LAMA5:PIK3R1:IRF4:VEGFA:ANXA1
Cluster 5	Canonical_Pathways	PID_IL23_PATHWAY	36	8	1.33152	4.02202e-05	0.00465496	STAT5A:IL18R1:IL18RAP:STAT1:STAT4:CXCL9:NFKB1:PIK3R1
Cluster 5	Canonical_Pathways	REACTOME_VEGFR2_MEDIATED_CELL_PROLIFERATION	19	6	0.702748	4.46444e-05	0.00490866	KRAS:PRKCA:SPHK1:SRC:PLCG1:VEGFA
Cluster 5	Canonical_Pathways	BIOCARTA_PDGF_PATHWAY	28	7	1.03563	5.46671e-05	0.00572442	JUN:FOS:STAT5A:PRKCA:STAT1:PLCG1:PIK3R1
Cluster 5	Canonical_Pathways	REACTOME_SIGNALING_BY_EGFR	49	9	1.81235	6.63634e-05	0.00663333	KRAS:PTPN11:SRC:PLCG1:LRIG1:EGF:PIK3R1:PTPRK:PTPN12
Cluster 5	Canonical_Pathways	REACTOME_DOWNSTREAM_SIGNAL_TRANSDUCTION	29	7	1.07262	6.97793e-05	0.0066715	KRAS:PTPN11:STAT5A:STAT1:SRC:PLCG1:PIK3R1
Cluster 5	Canonical_Pathways	KEGG_LEUKOCYTE_TRANSENDOTHELIAL_MIGRATION	114	14	4.21649	7.9579e-05	0.00717818	RASSF5:PTPN11:PRKCA:ICAM1:MYL9:PLCG1:MMP9:TXK:PIK3R1:CTNNA1:ITK:MAPK14:EZR:CD99
Cluster 5	Canonical_Pathways	REACTOME_INTERLEUKIN_37_SIGNALING	21	6	0.776721	8.38179e-05	0.00717818	IL18BP:CASP1:PTPN11:IL18R1:PTPN4:PTPN12
Cluster 5	Canonical_Pathways	REACTOME_HEMOSTASIS	610	42	22.5619	8.49215e-05	0.00717818	CD58:S100A10:TAGLN2:ATP2B4:JMJD1C:WEE1:MRVI1:SERPING1:EHD1:AMICA1:VWF:KRAS:TUBA1A:ITGA5:ATP2B1:SH2B3:PTPN11:DOCK9:ANXA2:SLC7A6:PRKCA:LGALS3BP:TUBB6:RHOB:SERPINE2:DOCK10:SIRPG:KIF3B:SRC:PLCG1:VPREB3:IGJ:PF4V1:EGF:ANXA5:PIK3R1:F12:HIST1H3H:MAPK14:TREM1:VEGFA:CD99
Cluster 5	Canonical_Pathways	REACTOME_ANTIGEN_ACTIVATES_B_CELL_RECEPTOR_BCR_LEADING_TO_GENERATION_OF_SECOND_MESSENGERS	30	7	1.1096	8.81359e-05	0.00717818	BLNK:CD79B:CD22:CD79A:TRPC1:PIK3R1:BLK
Cluster 5	Canonical_Pathways	KEGG_B_CELL_RECEPTOR_SIGNALING_PATHWAY	75	11	2.774	9.18242e-05	0.00721148	JUN:FCGR2B:CR2:BLNK:KRAS:FOS:CD79B:CD22:CD79A:NFKB1:PIK3R1
Cluster 5	Canonical_Pathways	PID_BCR_5PATHWAY	63	10	2.33016	9.64485e-05	0.00731346	JUN:FCGR2B:BLNK:FOS:CD79B:CD22:CD79A:NFKB1:PIK3R1:MAPK14
Cluster 5	Canonical_Pathways	REACTOME_INTERFERON_SIGNALING	180	18	6.65761	0.000125909	0.00869959	GBP1:GBP2:GBP5:FCGR1B:FCGR1A:TRIM8:TRIM21:UBE2L6:NCAM1:PTPN11:OAS2:IRF8:KPNB1:ICAM1:STAT1:PLCG1:UBA7:IRF4
Cluster 5	Canonical_Pathways	REACTOME_IMMUNOREGULATORY_INTERACTIONS_BETWEEN_A_LYMPHOID_AND_A_NON_LYMPHOID_CELL	119	14	4.40142	0.000127063	0.00869959	FCGR1A:FCGR2B:SH2D1B:SFTPD:NCR3LG1:AMICA1:KLRB1:ICAM2:ICAM1:CD22:SIGLEC6:CD8A:TREM1:CD99
Cluster 5	Canonical_Pathways	REACTOME_CELL_SURFACE_INTERACTIONS_AT_THE_VASCULAR_WALL	134	15	4.95622	0.00013015	0.00869959	CD58:AMICA1:KRAS:ITGA5:PTPN11:SLC7A6:SIRPG:SRC:PLCG1:VPREB3:IGJ:PF4V1:PIK3R1:TREM1:CD99
Cluster 5	Canonical_Pathways	REACTOME_SIGNALING_BY_VEGF	105	13	3.88361	0.000130553	0.00869959	MTOR:KRAS:PRKCA:SPHK1:BAIAP2:NCKAP1:SRC:PLCG1:PIK3R1:CTNNA1:CYFIP2:MAPK14:VEGFA
Cluster 5	Canonical_Pathways	REACTOME_INTERLEUKIN_1_FAMILY_SIGNALING	136	15	5.0302	0.000153759	0.00994461	IL18BP:CASP1:PTPN11:PSME1:PSME2:NOD2:PSMB10:PSMB3:IL18R1:IL18RAP:PTPN4:IL1RAP:NFKB1:PTPN12:RIPK2
Cluster 5	Canonical_Pathways	BIOCARTA_BCR_PATHWAY	33	7	1.22056	0.000167958	0.0105526	JUN:FOS:CD79B:PRKCA:CD79A:PLCG1:MAPK14
Cluster 5	Canonical_Pathways	REACTOME_SIGNALING_BY_THE_B_CELL_RECEPTOR_BCR	108	13	3.99457	0.000174037	0.0106308	BLNK:KRAS:PSME1:PSME2:PSMB10:PSMB3:CD79B:CD22:CD79A:TRPC1:NFKB1:PIK3R1:BLK
Cluster 5	Canonical_Pathways	KEGG_PATHWAYS_IN_CANCER	325	26	12.0207	0.000196429	0.0116743	MTOR:JUN:LAMC1:PTGS2:RASSF5:SUFU:TCF7L2:KRAS:FGF9:FOS:STAT5A:AXIN2:PRKCA:BCL2:STAT1:PLCG1:MMP9:LAMA5:PLD1:NFKB1:LEF1:EGF:PIK3R1:CTNNA1:VEGFA:RALGDS
Cluster 5	Canonical_Pathways	REACTOME_SIGNAL_REGULATORY_PROTEIN_FAMILY_INTERACTIONS	16	5	0.591788	0.000210794	0.0121983	SFTPD:PTPN11:SIRPG:SRC:FYB
Cluster 5	Canonical_Pathways	KEGG_NEUROTROPHIN_SIGNALING_PATHWAY	126	14	4.66033	0.000233674	0.0131756	JUN:SORT1:KRAS:SH2B3:PTPN11:RPS6KA5:BCL2:YWHAQ:PLCG1:YWHAH:NFKB1:PIK3R1:MAPK14:RIPK2
Cluster 5	Canonical_Pathways	PID_A6B1_A6B4_INTEGRIN_PATHWAY	46	8	1.70139	0.000250428	0.0133966	LAMC1:PMP22:PRKCA:YWHAQ:LAMA5:YWHAH:EGF:PIK3R1
Cluster 5	Canonical_Pathways	KEGG_CELL_ADHESION_MOLECULES_CAMS	112	13	4.14251	0.000250946	0.0133966	CD58:CD6:NCAM1:ICAM2:CDH2:ICAM1:CD22:CD8A:VCAN:CNTNAP2:CD274:PDCD1LG2:CD99
Cluster 5	Canonical_Pathways	REACTOME_SIGNALING_BY_PDGF	58	9	2.14523	0.000255871	0.0133966	THBS3:KRAS:PTPN11:STAT5A:STAT1:SRC:PLCG1:PIK3R1:PTPN12
Cluster 5	Canonical_Pathways	BIOCARTA_CCR5_PATHWAY	17	5	0.628774	0.000289585	0.0137849	JUN:FOS:PRKCA:PLCG1:MAPK14
Cluster 5	Canonical_Pathways	KEGG_CYTOKINE_CYTOKINE_RECEPTOR_INTERACTION	261	22	9.65354	0.000289958	0.0137849	TNFRSF14:TNFRSF25:IFNLR1:IL12RB2:IL15RA:CXCR5:TNFRSF17:TNFRSF13B:IL18R1:IL18RAP:ACVR1:TNFRSF6B:IL2RB:TNFRSF13C:CCR1:IL1RAP:PF4V1:CXCL9:CXCL10:EGF:VEGFA:IL11RA
Cluster 5	Canonical_Pathways	PID_FCER1_PATHWAY	59	9	2.18222	0.000292181	0.0137849	JUN:FCGR2B:PTPN11:FOS:SPHK1:PLCG1:NFKB1:PIK3R1:ITK
Cluster 5	Canonical_Pathways	PID_PI3K_PLC_TRK_PATHWAY	36	7	1.33152	0.000298091	0.0137849	KRAS:STAT5A:YWHAQ:SRC:PLCG1:YWHAH:PIK3R1
Cluster 5	Canonical_Pathways	PID_GMCSF_PATHWAY	36	7	1.33152	0.000298091	0.0137849	KRAS:PTPN11:FOS:IRF8:STAT5A:STAT1:PIK3R1
Cluster 5	Canonical_Pathways	REACTOME_SIGNALING_BY_RECEPTOR_TYROSINE_KINASES	467	33	17.2728	0.000300898	0.0137849	MTOR:THBS3:LAMC1:KRAS:SH2B3:PTPN11:FGF9:RPS6KA5:STAT5A:DUSP3:PRKCA:SPHK1:BAIAP2:NCKAP1:STAT1:SRC:PLCG1:MMP9:LAMA5:LRIG1:EGF:PIK3R1:MEF2C:CTNNA1:CYFIP2:FGFR4:MAPK14:VEGFA:PTPRK:GRB10:PTPN12:WWP1:RALGDS
Cluster 5	Canonical_Pathways	PID_PI3KCI_PATHWAY	48	8	1.77536	0.000339387	0.0152309	BLNK:KRAS:CYTH1:SRC:PLCG1:PIK3R1:ITK:BLK
Cluster 5	Canonical_Pathways	REACTOME_DOWNSTREAM_SIGNALING_OF_ACTIVATED_FGFR4	27	6	0.998642	0.000378429	0.0166433	KRAS:PTPN11:FGF9:PLCG1:PIK3R1:FGFR4
Cluster 5	Canonical_Pathways	REACTOME_SIGNALING_BY_FGFR1_IN_DISEASE	38	7	1.4055	0.000422706	0.0180792	KRAS:FGF9:STAT5A:STAT1:LRRFIP1:PLCG1:PIK3R1
Cluster 5	Canonical_Pathways	KEGG_COLORECTAL_CANCER	62	9	2.29318	0.000427521	0.0180792	JUN:TCF7L2:KRAS:FOS:AXIN2:BCL2:LEF1:PIK3R1:RALGDS
Cluster 5	Canonical_Pathways	REACTOME_CD22_MEDIATED_BCR_REGULATION	5	3	0.184934	0.000474508	0.0196876	CD79B:CD22:CD79A
Cluster 5	Canonical_Pathways	REACTOME_SIGNALING_BY_FGFR4_IN_DISEASE	11	4	0.406854	0.00049471	0.0201457	KRAS:PLCG1:PIK3R1:FGFR4
Cluster 5	Canonical_Pathways	BIOCARTA_IL12_PATHWAY	19	5	0.702748	0.000511764	0.0204612	JUN:IL12RB2:IL18R1:STAT4:MAPK14
Cluster 5	Canonical_Pathways	REACTOME_MYOGENESIS	29	6	1.07262	0.000570279	0.0220008	CDH2:TCF4:TCF3:MEF2C:CTNNA1:MAPK14
Cluster 5	Canonical_Pathways	PID_IL2_STAT5_PATHWAY	29	6	1.07262	0.000570279	0.0220008	CCND2:PTPN11:STAT5A:BCL2:IL2RB:PIK3R1
Cluster 5	Canonical_Pathways	KEGG_COMPLEMENT_AND_COAGULATION_CASCADES	65	9	2.40414	0.000610638	0.0231516	MASP2:C1QB:C4BPA:CD55:CR2:CD46:SERPING1:VWF:F12
Cluster 5	Canonical_Pathways	REACTOME_SIGNALING_BY_FGFR4	41	7	1.51646	0.000684144	0.0253184	KRAS:PTPN11:FGF9:SRC:PLCG1:PIK3R1:FGFR4
Cluster 5	Canonical_Pathways	PID_AVB3_OPN_PATHWAY	30	6	1.1096	0.000690815	0.0253184	JUN:FOS:MMP9:NFKB1:PIK3R1:GSN
Cluster 5	Canonical_Pathways	KEGG_HEMATOPOIETIC_CELL_LINEAGE	81	10	2.99593	0.00078156	0.0281746	FCGR1A:CD55:CR2:MS4A1:ITGA5:CD7:FCER2:CD22:CD8A:IL11RA
Cluster 5	Canonical_Pathways	PID_TCPTP_PATHWAY	42	7	1.55344	0.000795171	0.0282029	STAT5A:KPNB1:STAT1:SRC:EGF:PIK3R1:VEGFA
Cluster 5	Canonical_Pathways	REACTOME_MAPK_TARGETS_NUCLEAR_EVENTS_MEDIATED_BY_MAP_KINASES	31	6	1.14659	0.000830152	0.0289763	JUN:FOS:RPS6KA5:DUSP3:MEF2C:MAPK14
Cluster 5	Canonical_Pathways	PID_MTOR_4PATHWAY	68	9	2.5151	0.00085339	0.029322	MTOR:DDIT4:KRAS:CLIP1:SREBF1:PRKCA:YWHAQ:YWHAH:PLD1
Cluster 5	Canonical_Pathways	PID_CXCR3_PATHWAY	43	7	1.59043	0.000919954	0.0311228	MTOR:KRAS:SRC:CXCL9:CXCL10:PIK3R1:MAPK14
Cluster 5	Canonical_Pathways	PID_VEGFR1_2_PATHWAY	69	9	2.55208	0.00094985	0.0316473	PTPN11:PRKCA:SRC:PLCG1:PIK3R1:CTNNA1:MAPK14:VEGFA:GRB10
Cluster 5	Canonical_Pathways	REACTOME_P38MAPK_EVENTS	13	4	0.480827	0.00101037	0.0331613	KRAS:SRC:MAPK14:RALGDS
Cluster 5	Canonical_Pathways	PID_ERBB2_ERBB3_PATHWAY	44	7	1.62742	0.00105966	0.0337708	MTOR:JUN:KRAS:PTPN11:FOS:SRC:PIK3R1
Cluster 5	Canonical_Pathways	BIOCARTA_KERATINOCYTE_PATHWAY	44	7	1.62742	0.00105966	0.0337708	JUN:FOS:PRKCA:BCL2:NFKB1:EGF:MAPK14
Cluster 5	Canonical_Pathways	REACTOME_COSTIMULATION_BY_THE_CD28_FAMILY	57	8	2.10824	0.00111047	0.0348846	TNFRSF14:MTOR:PTPN11:SRC:BTLA:PIK3R1:CD274:PDCD1LG2
Cluster 5	Canonical_Pathways	REACTOME_INTERLEUKIN_17_SIGNALING	71	9	2.62606	0.0011693	0.0358226	JUN:FOS:RPS6KA5:NOD2:DUSP3:NFKB1:MEF2C:MAPK14:RIPK2
Cluster 5	Canonical_Pathways	PID_NCADHERIN_PATHWAY	33	6	1.22056	0.00117291	0.0358226	PTPN11:CDH2:PLCG1:PIK3R1:CTNNA1:GSN
Cluster 5	Canonical_Pathways	BIOCARTA_GLEEVEC_PATHWAY	23	5	0.850695	0.00131029	0.0394703	JUN:FOS:STAT5A:STAT1:PIK3R1
Cluster 5	Canonical_Pathways	BIOCARTA_TALL1_PATHWAY	14	4	0.517814	0.00137342	0.0399395	TNFRSF17:TNFRSF13C:NFKB1:MAPK14
Cluster 5	Canonical_Pathways	REACTOME_SIGNALING_BY_EGFRVIII_IN_CANCER	14	4	0.517814	0.00137342	0.0399395	KRAS:PLCG1:EGF:PIK3R1
Cluster 5	Canonical_Pathways	PID_IL2_PI3K_PATHWAY	34	6	1.25755	0.00138036	0.0399395	MTOR:PTPN11:BCL2:IL2RB:NFKB1:PIK3R1
Cluster 5	Canonical_Pathways	PID_IL4_2PATHWAY	60	8	2.2192	0.00156076	0.0434468	MTOR:STAT5A:FCER2:PARP14:PIK3R1:IRF4:MAPK14:MYBL1
Cluster 5	Canonical_Pathways	BIOCARTA_TSP1_PATHWAY	7	3	0.258907	0.00157082	0.0434468	JUN:FOS:MAPK14
Cluster 5	Canonical_Pathways	REACTOME_RECYCLING_PATHWAY_OF_L1	47	7	1.73838	0.0015806	0.0434468	TUBA1A:NUMB:RPS6KA5:TUBB6:SRC:EZR:DPYSL2
Cluster 5	Canonical_Pathways	PID_IL6_7_PATHWAY	47	7	1.73838	0.0015806	0.0434468	JUN:MCL1:PTPN11:FOS:STAT1:PIK3R1:MAPK14
Cluster 5	Canonical_Pathways	BIOCARTA_TOLL_PATHWAY	24	5	0.887682	0.00160534	0.043582	JUN:FOS:PGLYRP1:NFKB1:MAPK14
Cluster 5	Canonical_Pathways	BIOCARTA_BCELLSURVIVAL_PATHWAY	15	4	0.554801	0.0018185	0.0476058	MTOR:FOS:JUND:PIK3R1
Cluster 5	Canonical_Pathways	PID_NFKAPPAB_ATYPICAL_PATHWAY	15	4	0.554801	0.0018185	0.0476058	SRC:NFKB1:PIK3R1:MAPK14
Cluster 5	Canonical_Pathways	BIOCARTA_CDMAC_PATHWAY	15	4	0.554801	0.0018185	0.0476058	JUN:FOS:PRKCA:NFKB1
Cluster 5	Canonical_Pathways	KEGG_VEGF_SIGNALING_PATHWAY	76	9	2.81099	0.00190038	0.049164	PTGS2:KRAS:PRKCA:SPHK1:SRC:PLCG1:PIK3R1:MAPK14:VEGFA
Cluster 5	Canonical_Pathways	REACTOME_DOWNSTREAM_SIGNALING_OF_ACTIVATED_FGFR3	25	5	0.924668	0.00194639	0.0491967	KRAS:PTPN11:FGF9:PLCG1:PIK3R1
Cluster 5	Canonical_Pathways	REACTOME_SIGNALING_BY_NTRK2_TRKB	25	5	0.924668	0.00194639	0.0491967	KRAS:PTPN11:SRC:PLCG1:PIK3R1
Cluster 5	GO_bp	GO_REGULATION_OF_IMMUNE_SYSTEM_PROCESS	1437	122	53.1499	1.55823e-18	1.1453e-14	TNFRSF14:MASP2:MTOR:C1QB:IFNLR1:ZNF683:JUN:GBP1:GBP5:FCGR1B:FCGR1A:AIM2:FCGR2B:SH2D1B:C4BPA:CD55:CR2:CD46:ZMIZ1:SFTPD:SWAP70:NCR3LG1:NR1H3:SERPING1:CD6:AMICA1:TAPBPL:LAG3:KLRB1:KRAS:TESPA1:TRAFD1:PTPN11:HCAR2:PSME1:PSME2:COCH:FOS:RPS6KA5:VIMP:NOD2:NLRC5:PSMB10:SMPD3:KARS:FANCA:TNFRSF13B:PSMB3:DUSP3:CD79B:ICAM2:PRKCA:BAIAP2:BCL2:TCF3:FCER2:ICAM1:LSM14A:CD22:CLC:CD79A:PGLYRP1:DYSF:CD8A:IL18R1:IL18R…
Cluster 5	GO_bp	GO_POSITIVE_REGULATION_OF_IMMUNE_SYSTEM_PROCESS	993	93	36.7278	7.78423e-17	2.86071e-13	TNFRSF14:MASP2:C1QB:JUN:GBP1:GBP5:FCGR1A:AIM2:FCGR2B:SH2D1B:C4BPA:CD55:CR2:CD46:ZMIZ1:SFTPD:SWAP70:NR1H3:SERPING1:CD6:LAG3:KRAS:TESPA1:PTPN11:HCAR2:PSME1:PSME2:COCH:FOS:RPS6KA5:NOD2:NLRC5:PSMB10:KARS:PSMB3:DUSP3:CD79B:ICAM2:PRKCA:BAIAP2:BCL2:FCER2:ICAM1:LSM14A:CD22:CD79A:PGLYRP1:DYSF:IL18R1:IL18RAP:DPP4:NCKAP1:STAT1:IGFBP2:WDFY1:SIRPG:JAG1:SRC:PLCG1:UBASH3A:LGALS1:TNFRSF13C:CCR1:BTLA:PARP9:TXK:CX…
Cluster 5	GO_bp	GO_REGULATION_OF_IMMUNE_RESPONSE	923	86	34.1388	1.76438e-15	4.32273e-12	TNFRSF14:MASP2:C1QB:ZNF683:JUN:GBP1:GBP5:FCGR1B:FCGR1A:AIM2:FCGR2B:SH2D1B:C4BPA:CD55:CR2:CD46:SFTPD:NCR3LG1:NR1H3:SERPING1:AMICA1:LAG3:KLRB1:KRAS:TESPA1:TRAFD1:PTPN11:PSME1:PSME2:COCH:FOS:RPS6KA5:VIMP:NOD2:NLRC5:PSMB10:KARS:PSMB3:DUSP3:CD79B:ICAM2:BAIAP2:BCL2:FCER2:ICAM1:LSM14A:CD22:CLC:CD79A:PGLYRP1:CD8A:IL18R1:IL18RAP:NCKAP1:STAT1:WDFY1:SRC:PLCG1:UBASH3A:TNFRSF13C:PARP3:BTLA:PARP9:PARP14:TXK:NF…
Cluster 5	GO_bp	GO_RESPONSE_TO_CYTOKINE	1128	94	41.721	7.47383e-14	1.37332e-10	TNFRSF14:TNFRSF25:SRM:IFNLR1:LDLRAP1:JUN:IL12RB2:GBP1:GBP2:GBP5:HIPK1:CD58:FCGR1B:FCGR1A:MCL1:AIM2:PTGS2:PFKP:KLF6:IL15RA:VIM:TRIM8:TRIM21:KCNJ11:NR1H3:IL18BP:CASP1:NCAM1:CXCR5:KRAS:PTPN11:OAS2:RAB20:PSME1:PSME2:FOS:RPS6KA5:TCL1A:ANXA2:TNFRSF17:NOD2:MT3:NLRC5:PSMB10:SMPD3:KARS:IRF8:TNFRSF13B:PSMB3:STAT5A:PRKCA:SPHK1:BCL2:RFX2:FCER2:ICAM1:ACP5:JUND:LSM14A:IL18R1:IL18RAP:PTPN4:STAT1:STAT4:SRC:MMP9:…
Cluster 5	GO_bp	GO_LYMPHOCYTE_ACTIVATION	636	64	23.5236	3.10222e-13	4.56027e-10	TNFRSF14:MTOR:ZNF683:FCGR2B:CD55:CR2:CD46:KLF6:ZMIZ1:SFTPD:BLNK:SWAP70:MS4A1:CD6:AMICA1:CXCR5:LAG3:TESPA1:PTPN11:BCL11B:NOD2:PSMB10:FANCA:TNFRSF13B:DUSP3:CD79B:CD7:BCL2:TCF3:ICAM1:CD22:CLC:CD79A:PGLYRP1:CD8A:IL18R1:DPP4:IGFBP2:DOCK10:SIRPG:SRC:LGALS1:TNFRSF13C:PARP3:BTLA:BANK1:LEF1:KIAA0922:PIK3R1:MEF2C:MZB1:ITK:PRELID1:DUSP22:IRF4:CD83:FAM65B:BTN3A1:IDO1:RIPK2:CD274:PDCD1LG2:ANXA1:GSN
Cluster 5	GO_bp	GO_CYTOKINE_MEDIATED_SIGNALING_PATHWAY	737	70	27.2592	3.73171e-13	4.57134e-10	TNFRSF14:TNFRSF25:IFNLR1:IL12RB2:GBP1:GBP2:HIPK1:FCGR1B:FCGR1A:MCL1:AIM2:PTGS2:KLF6:IL15RA:VIM:TRIM8:TRIM21:NR1H3:IL18BP:CASP1:NCAM1:CXCR5:KRAS:PTPN11:OAS2:PSME1:PSME2:FOS:RPS6KA5:ANXA2:TNFRSF17:NOD2:MT3:NLRC5:PSMB10:KARS:IRF8:TNFRSF13B:PSMB3:STAT5A:SPHK1:BCL2:FCER2:ICAM1:LSM14A:IL18R1:IL18RAP:STAT1:STAT4:MMP9:LAMA5:TNFRSF6B:IL2RB:TNFRSF13C:CCR1:PARP9:PARP14:IL1RAP:TXK:PF4V1:CXCL9:CXCL10:NFKB1:PI…
Cluster 5	GO_bp	GO_POSITIVE_REGULATION_OF_IMMUNE_RESPONSE	726	67	26.8524	4.59824e-12	4.82816e-09	TNFRSF14:MASP2:C1QB:GBP1:GBP5:FCGR1A:AIM2:FCGR2B:SH2D1B:C4BPA:CD55:CR2:CD46:SFTPD:NR1H3:SERPING1:LAG3:KRAS:TESPA1:PSME1:PSME2:COCH:RPS6KA5:NOD2:NLRC5:PSMB10:KARS:PSMB3:DUSP3:CD79B:ICAM2:BAIAP2:BCL2:FCER2:LSM14A:CD22:CD79A:PGLYRP1:IL18R1:IL18RAP:NCKAP1:WDFY1:SRC:PLCG1:UBASH3A:TNFRSF13C:PARP9:TXK:NFKB1:ALPK1:FYB:PIK3R1:MEF2C:ITK:CYFIP2:DUSP22:IRF4:BTN3A1:BTN3A3:MAPK14:EZR:BLK:IDO1:RIPK2:CD274:PAX5:…
Cluster 5	GO_bp	GO_CELL_ACTIVATION	1315	99	48.6376	6.93258e-12	6.36931e-09	TNFRSF14:MTOR:ZNF683:JUN:CD58:FCGR2B:SH2D1B:CD55:CR2:CD46:KLF6:ZMIZ1:SFTPD:BLNK:SWAP70:NR1H3:MS4A1:CD6:BATF2:AMICA1:CXCR5:VWF:LAG3:TESPA1:HVCN1:PTPN11:SLC15A4:BCL11B:ANXA2:CPPED1:NOD2:PSMB10:KARS:FANCA:ALOX12:TNFRSF13B:DUSP3:KPNB1:CD79B:PRKCA:TMC6:CD7:BCL2:TCF3:ICAM1:CD97:CD22:CLC:CD79A:PGLYRP1:DYSF:CD8A:IL18R1:IL18RAP:DPP4:IGFBP2:SERPINE2:DOCK10:CAB39:SIRPG:MYL9:SRC:CTSA:MMP9:DNAJC5:LGALS1:TNFRS…
Cluster 5	GO_bp	GO_CYTOKINE_PRODUCTION	710	65	26.2606	1.39195e-11	1.13676e-08	TNFRSF14:IL12RB2:GBP1:GBP5:CD58:AIM2:FCGR2B:PTGS2:CD55:CD46:SFTPD:TRIM21:ABCC8:UBE2L6:CD6:LTBP3:CASP1:LAG3:PTPN11:CEBPE:RPS6KA5:VIMP:NOD2:NLRC5:KARS:IRF8:SPHK1:ACP5:LSM14A:CLC:PGLYRP1:CYP1B1:ANXA4:DYSF:IL18R1:IL18RAP:STAT1:LRRFIP1:SRC:SULF2:UBASH3A:TNFRSF13C:UBA7:IL1RAP:APOD:TXK:BANK1:NFKB1:LEF1:PIK3R1:ITK:IRF4:CD83:BTN3A1:MAPK14:POLR1C:UBE2J1:EZR:IDO1:RIPK2:GSDMD:CD274:PDCD1LG2:ANXA1:KLF4
Cluster 5	GO_bp	GO_ADAPTIVE_IMMUNE_RESPONSE	373	43	13.7961	3.83999e-11	2.8224e-08	TNFRSF14:MASP2:MTOR:C1QB:ZNF683:FCGR1B:FCGR2B:SH2D1B:C4BPA:CD55:CR2:CD46:SWAP70:SERPING1:CD6:IL18BP:TNFRSF17:TNFRSF13B:CD79B:CD7:FCER2:ICAM1:CLC:CD79A:CD8A:IL18R1:IL18RAP:JAG1:TNFRSF13C:PARP3:BTLA:TXK:IGJ:LEF1:MEF2C:ITK:DUSP22:IRF4:BTN3A1:BTN3A3:RIPK2:CD274:ANXA1
Cluster 5	GO_bp	GO_T_CELL_ACTIVATION	443	47	16.3851	8.39863e-11	5.61181e-08	TNFRSF14:MTOR:ZNF683:FCGR2B:CD55:CD46:ZMIZ1:SFTPD:CD6:AMICA1:LAG3:TESPA1:PTPN11:BCL11B:NOD2:PSMB10:FANCA:DUSP3:CD7:BCL2:ICAM1:CLC:CD8A:IL18R1:DPP4:IGFBP2:SIRPG:SRC:LGALS1:TNFRSF13C:BTLA:LEF1:KIAA0922:PIK3R1:ITK:PRELID1:DUSP22:IRF4:CD83:FAM65B:BTN3A1:IDO1:RIPK2:CD274:PDCD1LG2:ANXA1:GSN
Cluster 5	GO_bp	GO_DEFENSE_RESPONSE	1532	106	56.6637	1.75131e-10	1.07268e-07	TNFRSF14:MASP2:C1QB:IFNLR1:ZNF683:JUN:IFI44L:GBP1:GBP2:GBP5:TSPAN2:CD58:FCGR1B:FCGR1A:ADAM15:AIM2:FCGR2B:SH2D1B:PTGS2:C4BPA:CD55:CR2:CD46:VIM:DDIT4:SFTPD:BLNK:TRIM8:TRIM21:NR1H3:SERPING1:CD6:BATF2:CASP1:NCAM1:LAG3:KRAS:TRAFD1:PTPN11:OAS2:RAB20:CEBPE:PSME1:PSME2:COCH:FOS:RPS6KA5:VIMP:NOD2:NLRC5:PSMB10:KARS:IRF8:FANCA:PSMB3:ICAM2:SPHK1:LGALS3BP:BCL2:ICAM1:ACP5:CD97:LSM14A:PGLYRP1:IL18R1:IL18RAP:ACV…
Cluster 5	GO_bp	GO_REGULATION_OF_LYMPHOCYTE_ACTIVATION	399	43	14.7577	3.33264e-10	1.88422e-07	TNFRSF14:ZNF683:FCGR2B:CD55:CD46:ZMIZ1:SFTPD:CD6:LAG3:TESPA1:PTPN11:NOD2:FANCA:TNFRSF13B:DUSP3:BCL2:CD22:CLC:PGLYRP1:DPP4:IGFBP2:SIRPG:SRC:LGALS1:TNFRSF13C:PARP3:BTLA:BANK1:KIAA0922:PIK3R1:MEF2C:MZB1:PRELID1:DUSP22:IRF4:CD83:FAM65B:IDO1:RIPK2:CD274:PDCD1LG2:ANXA1:GSN
Cluster 5	GO_bp	GO_INTERFERON_GAMMA_MEDIATED_SIGNALING_PATHWAY	70	17	2.58907	4.62464e-10	2.42793e-07	GBP1:GBP2:FCGR1B:FCGR1A:TRIM8:TRIM21:NR1H3:NCAM1:OAS2:NLRC5:IRF8:ICAM1:STAT1:PARP9:PARP14:TXK:IRF4
Cluster 5	GO_bp	GO_IMMUNE_RESPONSE_REGULATING_CELL_SURFACE_RECEPTOR_SIGNALING_PATHWAY	365	40	13.5002	8.52642e-10	4.17794e-07	JUN:GBP1:FCGR1B:FCGR1A:FCGR2B:CR2:KRAS:TESPA1:PSME1:PSME2:FOS:RPS6KA5:PSMB10:PSMB3:DUSP3:CD79B:ICAM2:BAIAP2:BCL2:CD22:CD79A:NCKAP1:SRC:PLCG1:UBASH3A:BTLA:TXK:NFKB1:FYB:PIK3R1:MEF2C:ITK:CYFIP2:DUSP22:BTN3A1:BTN3A3:EZR:BLK:RIPK2:PAX5
Cluster 5	GO_bp	GO_REGULATION_OF_T_CELL_ACTIVATION	300	35	11.096	1.89213e-09	8.69196e-07	TNFRSF14:ZNF683:FCGR2B:CD55:CD46:ZMIZ1:SFTPD:CD6:LAG3:TESPA1:PTPN11:NOD2:FANCA:DUSP3:CLC:DPP4:IGFBP2:SIRPG:SRC:LGALS1:TNFRSF13C:BTLA:KIAA0922:PIK3R1:PRELID1:DUSP22:IRF4:CD83:FAM65B:IDO1:RIPK2:CD274:PDCD1LG2:ANXA1:GSN
Cluster 5	GO_bp	GO_BIOLOGICAL_ADHESION	1361	94	50.3389	2.42522e-09	1.04855e-06	TNFRSF14:MACF1:GBP1:CD58:S100A10:ADAM15:EFNA1:THBS3:FCGR2B:LAMC1:CD55:CD46:ZMIZ1:SFTPD:PDLIM1:SLK:SWAP70:CD6:NCAM1:AMICA1:VWF:LAG3:ITGA5:TESPA1:NUAK1:PTPN11:FBLN5:ANXA2:HAPLN3:NOD2:ZFHX3:SCARF1:ALOX12:DUSP3:ICAM2:PRKCA:CYTH1:LGALS3BP:BAIAP2:CDH2:BCL2:ICAM1:CD97:CD22:SIGLEC6:RHOB:CYP1B1:DYSF:FBLN7:ACVR1:DPP4:IGFBP2:SERPINE2:SIRPG:JAG1:TM9SF4:MYL9:SRC:LAMA5:LGALS1:TNFRSF13C:CCR1:BTLA:IL1RAP:APOD:LE…
Cluster 5	GO_bp	GO_REGULATION_OF_CELL_ADHESION	645	56	23.8564	2.74071e-09	1.11912e-06	TNFRSF14:MACF1:GBP1:S100A10:ADAM15:EFNA1:FCGR2B:CD55:CD46:ZMIZ1:SFTPD:SLK:SWAP70:CD6:LAG3:ITGA5:TESPA1:NUAK1:PTPN11:NOD2:ZFHX3:ALOX12:DUSP3:PRKCA:CYTH1:BCL2:ICAM1:CYP1B1:DYSF:DPP4:IGFBP2:SERPINE2:SIRPG:JAG1:SRC:LAMA5:LGALS1:TNFRSF13C:BTLA:APOD:LEF1:KIAA0922:PIK3R1:DUSP22:CD83:FAM65B:MAPK14:VEGFA:EPHA1:IDO1:RIPK2:CD274:PDCD1LG2:ANXA1:KLF4:GSN
Cluster 5	GO_bp	GO_IMMUNE_SYSTEM_DEVELOPMENT	941	72	34.8045	3.48678e-09	1.28813e-06	MTOR:ZNF683:JUN:HIPK1:TSPAN2:FCGR2B:CR2:CD46:KLF6:ZMIZ1:BLNK:SWAP70:BATF2:CXCR5:TESPA1:SH2B3:PTPN11:CEBPE:PSME1:PSME2:FOS:BCL11B:ANXA2:PSMB10:SMPD3:IRF8:FANCA:TNFRSF13B:PSMB3:CD79B:PRKCA:BCL2:TCF3:CLC:CD79A:PGLYRP1:TTC7A:CD8A:IL18R1:SLC40A1:STAT1:DOCK10:JAG1:MYL9:SRC:MMP9:LGALS1:CCR1:PARP3:TIPARP:RBM47:LEF1:KIAA0922:FST:PIK3R1:MEF2C:ITK:PRELID1:IRF4:CD83:HIST1H3H:MAPK14:VEGFA:L3MBTL3:HIPK2:IDO1:P…
Cluster 5	GO_bp	GO_ACTIVATION_OF_IMMUNE_RESPONSE	563	51	20.8235	3.50513e-09	1.28813e-06	MASP2:C1QB:GBP1:FCGR1A:AIM2:FCGR2B:C4BPA:CD55:CR2:CD46:SFTPD:NR1H3:SERPING1:KRAS:TESPA1:PSME1:PSME2:RPS6KA5:NOD2:PSMB10:PSMB3:DUSP3:CD79B:ICAM2:BAIAP2:BCL2:LSM14A:CD22:CD79A:PGLYRP1:NCKAP1:WDFY1:SRC:PLCG1:UBASH3A:TXK:NFKB1:ALPK1:FYB:PIK3R1:MEF2C:ITK:CYFIP2:DUSP22:IRF4:BTN3A1:BTN3A3:EZR:BLK:RIPK2:PAX5
Cluster 5	GO_bp	GO_REGULATION_OF_TRANSPORT	1767	113	65.3556	4.08334e-09	1.42917e-06	TNFRSF14:TARDBP:MTOR:PTCHD2:LDLRAP1:SH3GLB1:GBP1:CD58:AIM2:FCGR2B:CACNA1E:PTGS2:RGS2:ATP2B4:C4BPA:IL15RA:SFTPD:SUFU:TCF7L2:KCNJ11:ABCC8:KCNC1:NR1H3:BEST1:AHNAK:EHD1:NUMA1:UCP2:CASP1:HVCN1:ATXN2:PTPN11:OAS2:HCAR2:RAB20:ANG:NUMB:APBA2:ANXA2:RAB11A:VIMP:BAIAP3:SYT17:NOD2:SMPD3:KARS:SREBF1:RGS9:PRKCA:KCNJ2:CDH2:BCL2:ICAM1:CD22:YWHAQ:ANXA4:DYSF:RAB11FIP5:DPP4:SERPINE2:CAB39:SIRPG:TM9SF4:SRC:PLCG1:MMP9…
Cluster 5	GO_bp	GO_REGULATION_OF_CELL_ACTIVATION	516	48	19.0852	4.38606e-09	1.46534e-06	TNFRSF14:ZNF683:FCGR2B:CD55:CD46:ZMIZ1:SFTPD:NR1H3:CD6:LAG3:TESPA1:PTPN11:NOD2:KARS:FANCA:ALOX12:TNFRSF13B:DUSP3:PRKCA:BCL2:CD22:CLC:PGLYRP1:DPP4:IGFBP2:SERPINE2:SIRPG:SRC:LGALS1:TNFRSF13C:PARP3:BTLA:BANK1:KIAA0922:PIK3R1:MEF2C:MZB1:PRELID1:DUSP22:IRF4:CD83:FAM65B:IDO1:RIPK2:CD274:PDCD1LG2:ANXA1:GSN
Cluster 5	GO_bp	GO_IMMUNE_RESPONSE_REGULATING_SIGNALING_PATHWAY	521	48	19.2701	5.985e-09	1.9126e-06	JUN:GBP1:FCGR1B:FCGR1A:FCGR2B:CR2:SFTPD:NR1H3:KRAS:TESPA1:PSME1:PSME2:FOS:RPS6KA5:NOD2:PSMB10:PSMB3:DUSP3:CD79B:ICAM2:BAIAP2:BCL2:LSM14A:CD22:CD79A:PGLYRP1:NCKAP1:WDFY1:SRC:PLCG1:UBASH3A:BTLA:TXK:NFKB1:ALPK1:FYB:PIK3R1:MEF2C:ITK:CYFIP2:DUSP22:IRF4:BTN3A1:BTN3A3:EZR:BLK:RIPK2:PAX5
Cluster 5	GO_bp	GO_INNATE_IMMUNE_RESPONSE	851	66	31.4757	9.72783e-09	2.97915e-06	TNFRSF14:MASP2:C1QB:IFNLR1:ZNF683:GBP1:GBP2:GBP5:CD58:FCGR1B:FCGR1A:ADAM15:AIM2:FCGR2B:SH2D1B:C4BPA:CD55:CR2:CD46:VIM:SFTPD:TRIM8:TRIM21:NR1H3:SERPING1:CD6:CASP1:NCAM1:LAG3:KRAS:TRAFD1:PTPN11:OAS2:RAB20:PSME1:PSME2:COCH:RPS6KA5:NOD2:NLRC5:PSMB10:IRF8:PSMB3:ICAM2:ICAM1:LSM14A:PGLYRP1:IL18RAP:STAT1:WDFY1:SRC:PARP9:PARP14:IL1RAP:TXK:IGJ:NFKB1:ALPK1:F12:IRF4:TREM1:NUB1:RIPK2:GSDMD:ANXA1:GSN
Cluster 5	GO_bp	GO_REGULATION_OF_CELL_CELL_ADHESION	373	38	13.7961	1.69071e-08	4.97069e-06	TNFRSF14:FCGR2B:CD55:CD46:ZMIZ1:SFTPD:SWAP70:CD6:LAG3:TESPA1:PTPN11:NOD2:ALOX12:DUSP3:PRKCA:ICAM1:DPP4:IGFBP2:SERPINE2:SIRPG:JAG1:SRC:LGALS1:TNFRSF13C:BTLA:LEF1:KIAA0922:PIK3R1:DUSP22:CD83:FAM65B:MAPK14:IDO1:RIPK2:CD274:PDCD1LG2:ANXA1:KLF4
Cluster 5	GO_bp	GO_LEUKOCYTE_CELL_CELL_ADHESION	313	34	11.5768	1.98816e-08	5.62038e-06	TNFRSF14:FCGR2B:CD55:CD46:ZMIZ1:SFTPD:CD6:LAG3:ITGA5:TESPA1:PTPN11:NOD2:DUSP3:ICAM1:DPP4:IGFBP2:SIRPG:SRC:LGALS1:TNFRSF13C:BTLA:KIAA0922:PIK3R1:DUSP22:CD83:FAM65B:NT5E:EZR:IDO1:RIPK2:CD274:PDCD1LG2:ANXA1:KLF4
Cluster 5	GO_bp	GO_RESPONSE_TO_INTERFERON_GAMMA	175	24	6.47268	3.08811e-08	8.40653e-06	GBP1:GBP2:GBP5:CD58:FCGR1B:FCGR1A:VIM:TRIM8:TRIM21:NR1H3:CASP1:NCAM1:OAS2:RAB20:NLRC5:IRF8:ICAM1:STAT1:PARP9:PARP14:TXK:IRF4:NUB1:GSN
Cluster 5	GO_bp	GO_IMMUNE_EFFECTOR_PROCESS	1118	78	41.3512	4.2428e-08	1.11373e-05	TNFRSF14:MASP2:MTOR:C1QB:IFNLR1:ZNF683:IFI44L:GBP1:CD58:FCGR1A:AIM2:FCGR2B:SH2D1B:C4BPA:CD55:CR2:CD46:DDIT4:SWAP70:SERPING1:LAG3:HVCN1:OAS2:SLC15A4:ANXA2:CPPED1:NOD2:NLRC5:KARS:KPNB1:TMC6:BAIAP2:BCL2:FCER2:ICAM1:CD97:LSM14A:CD22:CLC:PGLYRP1:DYSF:CD8A:IL18R1:IL18RAP:NCKAP1:STAT1:DOCK10:CAB39:JAG1:SRC:PLCG1:CTSA:MMP9:DNAJC5:LGALS1:DYNC1LI1:PARP3:PARP9:PLD1:CXCL9:CXCL10:NFKB1:LEF1:PIK3R1:IQGAP2:MZB1…
Cluster 5	GO_bp	GO_ANTIGEN_RECEPTOR_MEDIATED_SIGNALING_PATHWAY	220	27	8.13708	4.69242e-08	1.18929e-05	GBP1:FCGR2B:TESPA1:PSME1:PSME2:PSMB10:PSMB3:DUSP3:CD79B:BCL2:CD22:CD79A:PLCG1:UBASH3A:TXK:NFKB1:FYB:PIK3R1:MEF2C:ITK:DUSP22:BTN3A1:BTN3A3:EZR:BLK:RIPK2:PAX5
Cluster 5	GO_bp	GO_ADAPTIVE_IMMUNE_RESPONSE_BASED_ON_SOMATIC_RECOMBINATION_OF_IMMUNE_RECEPTORS_BUILT_FROM_IMMUNOGLOBULIN_SUPERFAMILY_DOMAINS	235	28	8.69188	5.0365e-08	1.23394e-05	MASP2:MTOR:C1QB:FCGR2B:C4BPA:CD55:CR2:CD46:SWAP70:SERPING1:IL18BP:FCER2:ICAM1:CLC:CD8A:IL18R1:IL18RAP:JAG1:TNFRSF13C:PARP3:LEF1:MEF2C:DUSP22:IRF4:BTN3A3:RIPK2:CD274:ANXA1
Cluster 5	GO_bp	GO_LEUKOCYTE_DIFFERENTIATION	496	44	18.3454	7.84858e-08	1.86087e-05	MTOR:ZNF683:JUN:TSPAN2:FCGR2B:CR2:CD46:KLF6:ZMIZ1:BLNK:BATF2:TESPA1:CEBPE:FOS:BCL11B:ANXA2:FANCA:CD79B:PRKCA:BCL2:TCF3:CD79A:PGLYRP1:CD8A:IL18R1:DOCK10:SRC:MMP9:LGALS1:CCR1:LEF1:KIAA0922:PIK3R1:MEF2C:ITK:PRELID1:IRF4:CD83:MAPK14:VEGFA:L3MBTL3:CA2:RIPK2:ANXA1
Cluster 5	GO_bp	GO_REGULATION_OF_PROTEIN_LOCALIZATION	960	69	35.5073	8.88942e-08	2.01183e-05	TNFRSF14:TARDBP:LDLRAP1:SH3GLB1:GBP1:CD58:LMNA:AIM2:FCGR2B:RABGAP1L:CACNA1E:PTGS2:RASSF5:SUFU:TRIM8:TCF7L2:SWAP70:KCNJ11:ABCC8:NR1H3:NUMA1:UCP2:CASP1:PTPN11:HCAR2:ANG:NUMB:RAB11A:BAIAP3:NOD2:KARS:SREBF1:PRKCA:CDH2:BCL2:CD22:YWHAQ:ANXA4:RAB11FIP5:DPP4:TM9SF4:TP53INP2:SRC:YWHAH:PARP9:ECT2:IL1RAP:APOD:BANK1:EGF:ANXA5:SLC25A4:NDUFAF2:PIK3R1:BMP6:FAM65B:MAPK14:UBE2J1:EZR:MDFIC:INSIG1:BLK:LEPROTL1:RIPK…
Cluster 5	GO_bp	GO_REGULATION_OF_CELL_POPULATION_PROLIFERATION	1550	98	57.3294	9.03272e-08	2.01183e-05	TNFRSF14:MTOR:PTCHD2:IFNLR1:LDLRAP1:JUN:IL12RB2:HIPK1:LMNA:FCGR2B:LAMC1:PTGS2:RASSF5:CD55:CD46:AKR1C3:BAMBI:ZMIZ1:SFTPD:TCF7L2:ABCC8:CD6:RARRES3:LTBP3:AMICA1:CCND2:KRAS:NUAK1:FGF9:ANG:TCL1B:TCL1A:BCL11B:WARS:ANXA2:RBPMS2:SOX8:NOD2:SMPD3:KARS:FANCA:ALOX12:PMP22:TNFRSF13B:STAT5A:AXIN2:PRKCA:SPHK1:CDH2:BCL2:CD22:CLC:EMP3:FUZ:MED25:CYP1B1:DYSF:DPP4:CDCA7:STAT1:IGFBP2:SERPINE2:SIRPG:JAG1:PLCG1:MMP9:SU…
Cluster 5	GO_bp	GO_NEGATIVE_REGULATION_OF_RESPONSE_TO_STIMULUS	1535	97	56.7746	1.08849e-07	2.35305e-05	TNFRSF14:MTOR:DHRS3:GBP1:MCL1:EFNA1:LMNA:FCGR2B:PTGS2:RGS2:ATP2B4:C4BPA:CD55:CD46:BAMBI:DDIT4:SUFU:TCF7L2:NUCB2:ABCC8:HIPK3:NR1H3:SERPING1:UCP2:BRAP:MAPKAPK5:TRAFD1:PTPN11:FGF9:SPG20:PSME1:PSME2:ANXA2:RBPMS2:VIMP:HERPUD1:NLRC5:PSMB10:ALOX12:PSMB3:DUSP3:RGS9:AXIN2:APCDD1:CDH2:BCL2:ICAM1:ACP5:CD22:PGLYRP1:FUZ:NR4A2:ACVR1:STAT1:IGFBP2:SERPINE2:SRC:MMP9:SULF2:PMEPA1:STMN3:RGS19:OPRL1:UBASH3A:DUSP18:P…
Cluster 5	GO_bp	GO_LOCOMOTION	1736	106	64.209	1.44502e-07	3.03455e-05	TNFRSF14:MTOR:MACF1:JUN:CD58:ADAM15:EFNA1:LMNA:LAMC1:PTGS2:ATP2B4:BAMBI:RASGEF1A:DDIT4:SFTPD:TRIM8:SLK:TRIM21:SWAP70:PIK3C2A:ABCC8:NCAM1:AMICA1:CXCR5:ITGA5:PTPN11:FGF9:RAP2A:ANG:SYNE2:NUMB:RPS6KA5:BCL11B:RAB11A:SOX8:SLC7A6:SMPD3:KARS:ALOX12:STAT5A:DUSP3:PRKCA:SPHK1:APCDD1:CDH2:RNF165:BCL2:ICAM1:FUZ:RHOB:CYP1B1:DYSF:ZEB2:NR4A2:ACVR1:DPP4:NCKAP1:SERPINE2:DOCK10:SIRPG:JAG1:SRC:PLCG1:MMP9:LAMA5:VPREB…
Cluster 5	GO_bp	GO_REGULATION_OF_ESTABLISHMENT_OF_PROTEIN_LOCALIZATION	707	55	26.1496	1.60085e-07	3.26841e-05	TNFRSF14:TARDBP:SH3GLB1:GBP1:CD58:AIM2:FCGR2B:CACNA1E:PTGS2:SUFU:TCF7L2:KCNJ11:ABCC8:NR1H3:UCP2:CASP1:PTPN11:HCAR2:ANG:NUMB:RAB11A:BAIAP3:NOD2:KARS:SREBF1:PRKCA:BCL2:CD22:YWHAQ:ANXA4:RAB11FIP5:DPP4:TM9SF4:SRC:YWHAH:ECT2:IL1RAP:APOD:BANK1:ANXA5:SLC25A4:NDUFAF2:PIK3R1:BMP6:MAPK14:UBE2J1:EZR:MDFIC:INSIG1:BLK:RIPK2:NOV:GSDMD:CD274:ANXA1
Cluster 5	GO_bp	GO_RESPONSE_TO_MOLECULE_OF_BACTERIAL_ORIGIN	329	33	12.1686	2.1348e-07	4.24075e-05	JUN:IL12RB2:FCGR2B:PTGS2:CD55:VIM:ABCC8:NR1H3:CD6:IL18BP:CASP1:CEBPE:FOS:VIMP:NOD2:IRF8:PRKCA:ICAM1:ACP5:JUND:SRC:PF4V1:CXCL9:CXCL10:NFKB1:MEF2C:BMP6:MAPK14:SASH1:IDO1:RIPK2:CD274:PDCD1LG2
Cluster 5	GO_bp	GO_CELL_MOTILITY	1516	95	56.0719	2.20661e-07	4.26805e-05	TNFRSF14:MTOR:MACF1:JUN:CD58:ADAM15:EFNA1:LMNA:LAMC1:PTGS2:ATP2B4:BAMBI:RASGEF1A:DDIT4:SFTPD:SLK:SWAP70:PIK3C2A:ABCC8:AMICA1:CXCR5:ITGA5:PTPN11:FGF9:RAP2A:ANG:SYNE2:NUMB:BCL11B:RAB11A:SOX8:SLC7A6:SMPD3:KARS:ALOX12:STAT5A:DUSP3:PRKCA:SPHK1:APCDD1:CDH2:BCL2:ICAM1:FUZ:RHOB:CYP1B1:DYSF:ZEB2:NR4A2:ACVR1:DPP4:NCKAP1:SERPINE2:DOCK10:SIRPG:JAG1:SRC:PLCG1:MMP9:LAMA5:VPREB3:CACNA1I:CCR1:PARP9:PLD1:APOD:LDB…
Cluster 5	GO_bp	GO_REGULATION_OF_CELLULAR_COMPONENT_MOVEMENT	941	66	34.8045	4.1742e-07	7.86676e-05	TNFRSF14:MTOR:MACF1:JUN:ADAM15:EFNA1:LMNA:PTGS2:SLK:SWAP70:PIK3C2A:ABCC8:ITGA5:FGF9:RAP2A:SYNE2:NUMB:RAB11A:SMPD3:KARS:ALOX12:STAT5A:DUSP3:PRKCA:KCNJ2:SPHK1:BCL2:ICAM1:FUZ:RHOB:CYP1B1:DYSF:ACVR1:SERPINE2:DOCK10:JAG1:SRC:PLCG1:MMP9:LAMA5:CCR1:APOD:LDB2:CXCL10:LEF1:EGF:ANXA5:RAPGEF2:ZSWIM6:PIK3R1:MEF2C:MCTP1:CTNNA1:SH3RF2:DUSP22:FAM65B:MAPK14:VEGFA:PTPRK:SASH1:EPHA1:SGK223:NOV:CD274:ANXA1:KLF4
Cluster 5	GO_bp	GO_CELLULAR_RESPONSE_TO_OXYGEN_CONTAINING_COMPOUND	1083	73	40.0566	4.52186e-07	8.28159e-05	MTOR:JUN:ADAM15:FCGR2B:PTGS2:ATP2B4:CD55:AKR1C3:VIM:DDIT4:PIK3C2A:KCNJ11:NR1H3:CD6:IL18BP:UCP2:CASP1:ATP2B1:PTPN11:CEBPE:FOS:FBLN5:VIMP:BAIAP3:NOD2:MT3:SMPD3:IRF8:SREBF1:STAT5A:PRKCA:SPHK1:BAIAP2:ICAM1:RHOB:CYP1B1:BCL11A:RAB11FIP5:IL18RAP:NR4A2:STAT1:SRC:MMP9:LGALS1:GRAMD1C:XRN1:ECT2:PF4V1:CXCL9:CXCL10:NFKB1:ANXA5:RAPGEF2:NDUFAF2:PIK3R1:MEF2C:CTNNA1:MZB1:ADRB2:BMP6:MAPK14:SLC29A1:PTPRK:SASH1:EZR:…
Cluster 5	GO_bp	GO_NEGATIVE_REGULATION_OF_TRANSPORT	458	40	16.9399	4.61966e-07	8.28159e-05	MTOR:GBP1:FCGR2B:PTGS2:RGS2:SUFU:KCNJ11:ABCC8:NR1H3:UCP2:ATXN2:PTPN11:VIMP:SREBF1:BCL2:ICAM1:CD22:YWHAQ:ANXA4:DYSF:RAB11FIP5:SERPINE2:CAB39:MMP9:OPRL1:PACSIN2:APOD:BANK1:NFKB1:EGF:ANXA5:NDUFAF2:MCTP1:UBE2J1:EZR:GRB10:MDFIC:INSIG1:NOV:ANXA1
Cluster 5	GO_bp	GO_NEGATIVE_REGULATION_OF_ESTABLISHMENT_OF_PROTEIN_LOCALIZATION	174	22	6.43569	4.87575e-07	8.35325e-05	GBP1:FCGR2B:SUFU:KCNJ11:ABCC8:NR1H3:UCP2:PTPN11:SREBF1:CD22:ANXA4:RAB11FIP5:APOD:BANK1:ANXA5:NDUFAF2:UBE2J1:EZR:MDFIC:INSIG1:NOV:ANXA1
Cluster 5	GO_bp	GO_REGULATION_OF_PEPTIDE_SECRETION	459	40	16.9769	4.88693e-07	8.35325e-05	TNFRSF14:TARDBP:GBP1:CD58:AIM2:FCGR2B:CACNA1E:TCF7L2:KCNJ11:ABCC8:NR1H3:UCP2:CASP1:PTPN11:HCAR2:ANG:BAIAP3:NOD2:KARS:SREBF1:PRKCA:CD22:ANXA4:RAB11FIP5:DPP4:SRC:IL1RAP:BANK1:ANXA5:SLC25A4:NDUFAF2:BMP6:MAPK14:EZR:BLK:RIPK2:NOV:GSDMD:CD274:ANXA1
Cluster 5	GO_bp	GO_POSITIVE_REGULATION_OF_SIGNALING	1759	105	65.0597	5.00294e-07	8.35719e-05	TARDBP:MTOR:LDLRAP1:MACF1:JUN:MCL1:S100A4:EFNA1:FCGR2B:PTGS2:AKR1C3:BAMBI:RASGEF1A:ZMIZ1:BLNK:FRAT1:TRIM8:TCF7L2:FAM53B:NR1H3:NUMA1:CASP1:KRAS:ITGA5:TESPA1:SH2B3:MAPKAPK5:PTPN11:HRK:HCAR2:FGF9:PSME1:PSME2:GPR65:ANXA2:BAIAP3:NOD2:MT3:NLRC5:PSMB10:MLKL:KARS:PSMB3:RGS9:AXIN2:PRKCA:SPHK1:SECTM1:CDH2:RNF165:BCL2:GADD45B:ICAM1:LSM14A:YWHAQ:CYP1B1:MAL:IL18R1:SLC20A1:ZEB2:ACVR1:WDFY1:SERPINE2:ITM2C:JAG1:…
Cluster 5	GO_bp	GO_NEGATIVE_REGULATION_OF_SIGNALING	1296	83	47.9348	5.86149e-07	9.57376e-05	MTOR:DHRS3:GBP1:MCL1:EFNA1:LMNA:FCGR2B:PTGS2:RGS2:ATP2B4:CD46:BAMBI:DDIT4:SUFU:TCF7L2:KCNJ11:ABCC8:HIPK3:NR1H3:UCP2:BRAP:MAPKAPK5:PTPN11:FGF9:SPG20:PSME1:PSME2:RBPMS2:VIMP:HERPUD1:NLRC5:PSMB10:SREBF1:PSMB3:DUSP3:RGS9:AXIN2:APCDD1:CDH2:BCL2:ICAM1:CD22:FUZ:RAB11FIP5:NR4A2:ACVR1:STAT1:IGFBP2:SERPINE2:SRC:MMP9:SULF2:PMEPA1:STMN3:RGS19:OPRL1:UBASH3A:DUSP18:PARP14:VEPH1:APOD:BANK1:EGF:ANXA5:KIAA0922:FS…
Cluster 5	GO_bp	GO_RESPONSE_TO_BACTERIUM	593	47	21.9331	7.74912e-07	0.000123818	TNFRSF14:JUN:IL12RB2:GBP5:FCGR2B:PTGS2:CD55:VIM:SFTPD:ABCC8:NR1H3:MS4A1:CD6:IL18BP:CASP1:OAS2:CEBPE:COCH:FOS:VIMP:NOD2:NLRC5:IRF8:CD79B:PRKCA:BAIAP2:ICAM1:ACP5:JUND:PGLYRP1:SRC:IGJ:PF4V1:CXCL9:CXCL10:BANK1:NFKB1:MEF2C:BMP6:MAPK14:SASH1:IDO1:RIPK2:GSDMD:CD274:PDCD1LG2:NFIB
Cluster 5	GO_bp	GO_REGULATION_OF_RESPONSE_TO_STRESS	1396	87	51.6335	9.58092e-07	0.000149829	MTOR:IFNLR1:GBP5:MCL1:LMNA:AIM2:FCGR2B:SH2D1B:PTGS2:ATP2B4:SFTPD:ABCC8:HIPK3:NR1H3:SERPING1:CD6:LAG3:KRAS:NUAK1:TRAFD1:PTPN11:SETD8:RAP2A:PSME1:PSME2:COCH:RPS6KA5:FBLN5:ANXA2:VIMP:NOD2:HERPUD1:NLRC5:PSMB10:MLKL:KARS:FANCA:SCARF1:ALOX12:PSMB3:DUSP3:ICAM2:AXIN2:PRKCA:BCL2:GADD45B:ACP5:LSM14A:PGLYRP1:IL18RAP:ZEB2:STAT1:WDFY1:SERPINE2:SRC:MMP9:PARP3:PARP9:PARP14:APOD:RELL1:TXK:NFKB1:ALPK1:ANXA5:PIK3R…
Cluster 5	GO_bp	GO_CELL_CELL_ADHESION	794	57	29.3675	1.29485e-06	0.000198274	TNFRSF14:CD58:FCGR2B:CD55:CD46:ZMIZ1:SFTPD:PDLIM1:SWAP70:CD6:AMICA1:LAG3:ITGA5:TESPA1:PTPN11:ANXA2:NOD2:ALOX12:DUSP3:ICAM2:PRKCA:BAIAP2:CDH2:BCL2:ICAM1:CYP1B1:ACVR1:DPP4:IGFBP2:SERPINE2:SIRPG:JAG1:MYL9:SRC:LGALS1:TNFRSF13C:BTLA:IL1RAP:LEF1:KIAA0922:PIK3R1:CTNNA1:CYFIP2:DUSP22:CD83:FAM65B:MAPK14:COL19A1:NT5E:EZR:IDO1:RIPK2:NOV:CD274:PDCD1LG2:ANXA1:KLF4
Cluster 5	GO_bp	GO_NEGATIVE_REGULATION_OF_MULTICELLULAR_ORGANISMAL_PROCESS	1152	74	42.6087	2.26996e-06	0.000340495	MTOR:PTCHD2:GBP1:EFNA1:LMNA:FCGR2B:PTGS2:RGS2:ATP2B4:VIM:SFTPD:SUFU:ABCC8:NR1H3:UBE2L6:SERPING1:LAG3:PTPN11:FGF9:SPG20:RPS6KA5:ANXA2:VIMP:SOX8:MT3:NLRC5:ALOX12:PMP22:AXIN2:BCL2:ACP5:PGLYRP1:FUZ:BCL11A:ANXA4:RAB11FIP5:IL18R1:STAT1:SERPINE2:ITM2C:JAG1:ISM1:MMP9:YWHAH:LGALS1:CCR1:UBA7:PARP3:SFMBT1:APOD:CXCL10:BANK1:NFKB1:LEF1:ANXA5:KIAA0922:RAPGEF2:PIK3R1:MEF2C:CTNNA1:ADRB2:F12:CD83:MYLIP:EZR:SGK223…
Cluster 5	GO_bp	GO_RESPONSE_TO_OXYGEN_CONTAINING_COMPOUND	1559	93	57.6623	2.54172e-06	0.000373633	MTOR:JUN:IL12RB2:SORT1:ADAM15:FCGR2B:PTGS2:RGS2:ATP2B4:CD55:AKR1C3:VIM:DDIT4:TCF7L2:PIK3C2A:KCNJ11:ABCC8:NR1H3:CD6:IL18BP:UCP2:CASP1:ATP2B1:PTPN11:CEBPE:FOS:FBLN5:VIMP:BAIAP3:NOD2:MT3:SMPD3:IRF8:SREBF1:STAT5A:RGS9:PRKCA:SPHK1:BAIAP2:RBBP8:BCL2:ICAM1:ACP5:JUND:FOSB:RHOB:CYP1B1:BCL11A:RAB11FIP5:IL18RAP:NR4A2:STAT1:IGFBP2:JAG1:SRC:MMP9:RGS19:OPRL1:LGALS1:GRAMD1C:XRN1:ECT2:APOD:PF4V1:CXCL9:CXCL10:NFK…
Cluster 5	GO_bp	GO_REGULATION_OF_CELL_DIFFERENTIATION	1762	102	65.1706	2.9934e-06	0.000431401	MTOR:PTCHD2:ZNF683:MACF1:JUN:GBP1:SORT1:S100A10:EFNA1:FCGR2B:PTGS2:RGS2:CD46:VIM:BAMBI:ZMIZ1:SUFU:TCF7L2:ABCC8:NR1H3:LGALS12:EHD1:LTBP3:NUMA1:PLEKHB1:KRAS:TESPA1:FGF9:SPG20:WDFY2:RAP2A:PSME1:PSME2:NUMB:FOS:BCL11B:ANXA2:RBPMS2:RAB11A:SOX8:SYT17:MT3:PSMB10:ZFHX3:FANCA:SCARF1:PMP22:PSMB3:AXIN2:PRKCA:CDH2:TCF4:BCL2:TCF3:JUND:PGLYRP1:FUZ:BCL11A:ZEB2:ACVR1:STAT1:SERPINE2:ITM2C:JAG1:MYL9:MMP9:ABCG1:YWHA…
Cluster 5	GO_bp	GO_HOMEOSTATIC_PROCESS	1854	106	68.5734	3.26328e-06	0.000459348	EXOSC10:PTCHD2:LDLRAP1:MCOLN3:MCL1:PTGS2:ATP2B4:CD55:HKDC1:SFTPD:SFXN2:CNNM2:OBFC1:TCF7L2:SWAP70:KCNJ11:ABCC8:NR1H3:EHD1:POLA2:UCP2:POLD3:CXCR5:KRAS:NELL2:ATP2B1:HVCN1:MAPKAPK5:HECTD4:PTPN11:HCAR2:RAB20:ANG:SLC22A17:GPR65:CKB:SLC12A6:RMDN3:ANXA2:RAB11A:VIMP:BAIAP3:TNFRSF17:NOD2:MT3:HERPUD1:ALOX12:TNFRSF13B:PRKCA:KCNJ2:CDH2:BCL2:ICAM1:ACP5:TTC7A:RAB11FIP5:IL18R1:SLC40A1:STAT1:DOCK10:TMX4:TM9SF4:TP…
Cluster 5	GO_bp	GO_CELLULAR_RESPONSE_TO_BIOTIC_STIMULUS	225	24	8.32201	3.31231e-06	0.000459348	FCGR2B:CD55:VIM:NR1H3:CD6:CASP1:CEBPE:VIMP:NOD2:IRF8:PRKCA:ICAM1:SRC:PF4V1:CXCL9:CXCL10:NFKB1:MEF2C:BMP6:MAPK14:SASH1:RIPK2:CD274:PDCD1LG2
Cluster 5	GO_bp	GO_RESPONSE_TO_TUMOR_NECROSIS_FACTOR	290	28	10.7262	3.71453e-06	0.000505589	TNFRSF14:TNFRSF25:GBP1:GBP2:HIPK1:CD58:AIM2:PTGS2:KCNJ11:IL18BP:CASP1:PSME1:PSME2:TCL1A:TNFRSF17:PSMB10:SMPD3:KARS:TNFRSF13B:PSMB3:SPHK1:ICAM1:STAT1:TNFRSF6B:TNFRSF13C:NFKB1:MAPK14:NUB1
Cluster 5	GO_bp	GO_POSITIVE_REGULATION_OF_TRANSPORT	929	62	34.3607	4.81434e-06	0.000643371	TNFRSF14:TARDBP:LDLRAP1:SH3GLB1:CD58:AIM2:FCGR2B:PTGS2:IL15RA:SFTPD:TCF7L2:KCNJ11:ABCC8:KCNC1:NR1H3:EHD1:NUMA1:CASP1:PTPN11:HCAR2:ANG:ANXA2:BAIAP3:NOD2:SMPD3:KARS:RGS9:KCNJ2:CDH2:BCL2:YWHAQ:SIRPG:TM9SF4:SRC:PLCG1:OPRL1:ABCG1:YWHAH:IL2RB:CACNA1I:CCR1:TRPC1:ECT2:IL1RAP:CXCL9:CXCL10:EGF:PIK3R1:ADRB2:PRELID1:BMP6:MAPK14:VEGFA:STXBP5:EZR:CALCR:BLK:CA2:RIPK2:GSDMD:CD274:ANXA1
Cluster 5	GO_bp	GO_PEPTIDE_SECRETION	579	44	21.4153	5.22061e-06	0.000685206	TNFRSF14:TARDBP:GBP1:GBP5:CD58:AIM2:FCGR2B:CACNA1E:TCF7L2:KCNJ11:ABCC8:NR1H3:UCP2:CASP1:PTPN11:HCAR2:ANG:BAIAP3:NOD2:SMPD3:KARS:SREBF1:PRKCA:CD22:ANXA4:DYSF:RAB11FIP5:DPP4:SRC:IL1RAP:BANK1:ANXA5:SLC25A4:NDUFAF2:BMP6:BTN3A1:MAPK14:EZR:BLK:RIPK2:NOV:GSDMD:CD274:ANXA1
Cluster 5	GO_bp	GO_NEGATIVE_REGULATION_OF_PEPTIDE_SECRETION	129	17	4.77129	5.45009e-06	0.000702775	GBP1:FCGR2B:KCNJ11:ABCC8:NR1H3:UCP2:PTPN11:SREBF1:CD22:ANXA4:RAB11FIP5:BANK1:ANXA5:NDUFAF2:EZR:NOV:ANXA1
Cluster 5	GO_bp	GO_RESPONSE_TO_LIPID	897	60	33.1771	6.42841e-06	0.000814635	JUN:IL12RB2:ADAM15:PTGS2:CD55:AKR1C3:VIM:DDIT4:KCNJ11:ABCC8:NR1H3:CD6:IL18BP:UCP2:CASP1:KRAS:ATP2B1:CEBPE:FOS:VIMP:NOD2:IRF8:ALOX12:SREBF1:RGS9:PRKCA:RBBP8:BCL2:ICAM1:ACP5:JUND:FOSB:NR4A2:IGFBP2:SRC:PMEPA1:OPRL1:ABCG1:YWHAH:GRAMD1C:XRN1:PF4V1:CXCL9:CXCL10:NFKB1:LEF1:NR3C2:MEF2C:BMP6:MAPK14:SASH1:CALCR:INSIG1:IDO1:CA2:RIPK2:CD274:PDCD1LG2:ANXA1:KLF4
Cluster 5	GO_bp	GO_TUBE_MORPHOGENESIS	799	55	29.5524	6.95104e-06	0.00086384	JUN:HIPK1:WARS2:ADAM15:EFNA1:PTGS2:ZMIZ1:SUFU:PIK3C2A:ABCC8:KRAS:ITGA5:TCTN1:FGF9:ANG:WARS:SLC12A6:ANXA2:RBPMS2:SOX8:ALOX12:PRKCA:SPHK1:CDH2:BCL2:FUZ:RHOB:CYP1B1:DYSF:ZEB2:ACVR1:STAT1:JAG1:ISM1:SRC:PLCG1:LAMA5:TIPARP:APOD:CXCL10:LEF1:EGF:RAPGEF2:MEF2C:KLHL3:MAPK14:VEGFA:SASH1:HIPK2:EPHA1:NOV:MTSS1:NFIB:ANXA1:KLF4
Cluster 5	GO_bp	GO_POSITIVE_REGULATION_OF_LEUKOCYTE_CELL_CELL_ADHESION	204	22	7.54529	7.05176e-06	0.00086384	TNFRSF14:CD55:CD46:ZMIZ1:CD6:TESPA1:PTPN11:NOD2:ICAM1:DPP4:IGFBP2:SIRPG:SRC:LGALS1:TNFRSF13C:BTLA:PIK3R1:CD83:RIPK2:CD274:PDCD1LG2:ANXA1
Cluster 5	GO_bp	GO_POSITIVE_REGULATION_OF_CYTOKINE_PRODUCTION	421	35	15.5714	7.20754e-06	0.000868449	TNFRSF14:IL12RB2:GBP5:CD58:AIM2:PTGS2:CD46:ABCC8:CD6:CASP1:PTPN11:NOD2:KARS:IRF8:LSM14A:CYP1B1:IL18R1:STAT1:LRRFIP1:SRC:SULF2:TNFRSF13C:IL1RAP:TXK:NFKB1:PIK3R1:IRF4:CD83:MAPK14:POLR1C:IDO1:RIPK2:GSDMD:CD274:ANXA1
Cluster 5	GO_bp	GO_REGULATION_OF_DEFENSE_RESPONSE	703	50	26.0017	7.61609e-06	0.000902875	IFNLR1:GBP5:AIM2:FCGR2B:SH2D1B:PTGS2:SFTPD:NR1H3:SERPING1:CD6:LAG3:KRAS:TRAFD1:PTPN11:PSME1:PSME2:COCH:RPS6KA5:VIMP:NOD2:NLRC5:PSMB10:KARS:FANCA:PSMB3:ICAM2:ACP5:LSM14A:PGLYRP1:IL18RAP:STAT1:WDFY1:SRC:MMP9:PARP9:PARP14:APOD:TXK:NFKB1:ALPK1:MEF2C:F12:IRF4:MAPK14:NT5E:IDO1:RIPK2:NOV:ANXA1:KLF4
Cluster 5	GO_bp	GO_REGULATION_OF_ANATOMICAL_STRUCTURE_MORPHOGENESIS	1031	66	38.1333	9.26474e-06	0.00108089	MTOR:MACF1:GBP1:HIPK1:S100A10:EFNA1:PTGS2:BAMBI:PIK3C2A:ABCC8:EHD1:ITGA5:SPG20:RAP2A:PSME1:PSME2:COCH:DAAM1:WARS:RAB11A:SOX8:SYT17:MT3:PSMB10:ALOX12:PSMB3:PRKCA:SPHK1:BAIAP2:EPB41L3:CDH2:BCL2:ICAM1:FUZ:RHOB:CYP1B1:BCL11A:ZEB2:ACVR1:STAT1:JAG1:ISM1:SRC:PLCG1:SULF2:YWHAH:TNFRSF13C:TRAK1:CXCL9:CXCL10:RAPGEF2:ZSWIM6:MEF2C:RHOBTB3:FAM65B:MAPK14:VEGFA:SASH1:EZR:HIPK2:EPHA1:SGK223:DPYSL2:NFIB:ANXA1:KLF4
Cluster 5	GO_bp	GO_NEGATIVE_REGULATION_OF_CELL_ADHESION	256	25	9.4686	1.0004e-05	0.0011489	TNFRSF14:GBP1:ADAM15:FCGR2B:SFTPD:SWAP70:LAG3:PTPN11:ALOX12:DUSP3:CYP1B1:SERPINE2:JAG1:SRC:LGALS1:APOD:KIAA0922:PIK3R1:DUSP22:FAM65B:IDO1:CD274:PDCD1LG2:ANXA1:KLF4
Cluster 5	GO_bp	GO_CELL_PROJECTION_ORGANIZATION	1485	87	54.9253	1.11595e-05	0.00126188	MTOR:MACF1:JUN:TSPAN2:PHGDH:EFNA1:FCGR2B:RGS2:VIM:ACTR1A:ARL3:WEE1:EHD1:NCAM1:EMP1:TUBA1A:TCTN1:PTPN11:RILPL2:SPG20:RAP2A:SYNE2:NUMB:RPS6KA5:BCL11B:RAB11A:HDGFRP3:CLUAP1:SYT17:MT3:SCARF1:GAS7:PMP22:PRKCA:BAIAP2:EPB41L3:CDH2:RNF165:BCL2:RFX2:ICAM1:EMP3:FUZ:BCL11A:ZEB2:NR4A2:NCKAP1:DOCK10:ITM2C:KIF3B:SRC:PLCG1:LAMA5:STMN3:YWHAH:LGALS1:PACSIN2:TTC21A:TRAK1:PLD1:APOD:WDR19:RAPGEF2:ZSWIM6:PIK3R1:MEF2C…
Cluster 5	GO_bp	GO_POSITIVE_REGULATION_OF_MULTICELLULAR_ORGANISMAL_PROCESS	1665	95	61.5829	1.23365e-05	0.00137384	TNFRSF14:MTOR:LDLRAP1:MACF1:JUN:IL12RB2:GBP5:HIPK1:CD58:AIM2:PTGS2:RGS2:CD46:BAMBI:ZMIZ1:TCF7L2:PIK3C2A:ABCC8:CD6:NUMA1:UCP2:CASP1:ITGA5:TESPA1:PTPN11:HCAR2:FGF9:NUMB:FOS:ANXA2:RAB11A:SOX8:SYT17:NOD2:KARS:IRF8:SCARF1:ALOX12:STAT5A:AXIN2:PRKCA:SPHK1:TCF4:BCL2:TCF3:ICAM1:LSM14A:RHOB:CYP1B1:IL18R1:ZEB2:ACVR1:STAT1:SERPINE2:LRRFIP1:JAG1:SRC:PLCG1:MMP9:SULF2:OPRL1:TNFRSF13C:TRAK1:CCR1:ECT2:IL1RAP:TXK:…
Cluster 5	GO_bp	GO_LEUKOCYTE_PROLIFERATION	278	26	10.2823	1.44354e-05	0.00158358	TNFRSF14:FCGR2B:CD55:CR2:CD46:SFTPD:MS4A1:CD6:PSMB10:TNFRSF13B:BCL2:CD22:CLC:CD79A:IGFBP2:TNFRSF13C:LEF1:KIAA0922:MEF2C:MZB1:BTN3A1:IDO1:RIPK2:CD274:PDCD1LG2:ANXA1
Cluster 5	GO_bp	GO_HUMORAL_IMMUNE_RESPONSE_MEDIATED_BY_CIRCULATING_IMMUNOGLOBULIN	41	9	1.51646	1.47346e-05	0.00159264	MASP2:C1QB:FCGR2B:C4BPA:CD55:CR2:CD46:SERPING1:FCER2
Cluster 5	GO_bp	GO_TUBE_DEVELOPMENT	985	63	36.4319	1.53324e-05	0.00163323	JUN:NFIA:HIPK1:WARS2:PHGDH:ADAM15:EFNA1:PTGS2:ZMIZ1:SFTPD:SUFU:PIK3C2A:ABCC8:KRAS:ITGA5:TCTN1:FGF9:ANG:REC8:WARS:SLC12A6:ANXA2:RBPMS2:SOX8:SMPD3:ALOX12:SREBF1:PRKCA:SPHK1:CDH2:BCL2:FUZ:RHOB:CYP1B1:DYSF:ZEB2:ACVR1:STAT1:SERPINE2:JAG1:ISM1:SRC:PLCG1:LAMA5:TIPARP:APOD:WDR19:CXCL10:LEF1:EGF:RAPGEF2:MEF2C:KLHL3:MAPK14:VEGFA:SASH1:HIPK2:EPHA1:NOV:MTSS1:NFIB:ANXA1:KLF4
Cluster 5	GO_bp	GO_CELLULAR_MACROMOLECULE_LOCALIZATION	1857	103	68.6844	1.67673e-05	0.00176057	TARDBP:EXOSC10:LDLRAP1:MACF1:SH3GLB1:GBP1:GBP2:GBP5:S100A10:LMNA:RABGAP1L:PTGS2:RASSF5:OBSCN:SUFU:TRIM8:ARL3:TCF7L2:RPS13:KCNJ11:TIMM10:VPS37C:EHD1:NUMA1:VPS29:TCTN1:RPL6:PTPN11:CLIP1:RILPL2:FGF9:RAP2A:RAB20:SYNE2:NUMB:TTC7B:FBLN5:HERC2:ANXA2:RAB11A:TBC1D2B:VIMP:CLUAP1:HERPUD1:ZDHHC1:SGSM2:SREBF1:KPNB1:AXIN2:WIPI1:EPB41L3:CDH2:BCL2:YWHAQ:RHOB:MAPRE3:TTC7A:RAB11FIP5:VAMP5:MAL:CXXC11:TM9SF4:KIF3B:T…
Cluster 5	GO_bp	GO_POSITIVE_REGULATION_OF_CELL_POPULATION_PROLIFERATION	892	58	32.9922	2.10874e-05	0.00218299	MTOR:PTCHD2:LDLRAP1:JUN:IL12RB2:HIPK1:LAMC1:PTGS2:CD55:CD46:AKR1C3:BAMBI:ZMIZ1:TCF7L2:CD6:LTBP3:AMICA1:CCND2:KRAS:FGF9:ANG:TCL1B:TCL1A:ANXA2:RBPMS2:SOX8:NOD2:SMPD3:ALOX12:STAT5A:PRKCA:SPHK1:BCL2:DYSF:DPP4:STAT1:IGFBP2:SIRPG:PLCG1:MMP9:TNFRSF13C:CXCL10:LEF1:EGF:MEF2C:MZB1:FGFR4:BMP6:MAPK14:VEGFA:HIPK2:EPHA1:RIPK2:CD274:PDCD1LG2:IL11RA:ANXA1:UBE2A
Cluster 5	GO_bp	GO_RESPONSE_TO_MECHANICAL_STIMULUS	203	21	7.50831	2.13912e-05	0.00218368	JUN:PTGS2:KCNC1:CASP1:PTPN11:FOS:KCNJ2:JUND:FOSB:STAT1:IGFBP2:SERPINE2:SRC:XPC:CXCL10:NFKB1:ERCC8:BMP6:MAPK14:CNTNAP2:DFNB31
Cluster 5	GO_bp	GO_SECRETION	1600	91	59.1788	2.17222e-05	0.0021871	TNFRSF14:TARDBP:GBP1:GBP5:CD58:MTX1:AIM2:TAGLN2:FCGR2B:CACNA1E:CD55:EXOC6:TCF7L2:PIK3C2A:KCNJ11:ABCC8:NR1H3:SERPING1:UCP2:CASP1:VWF:HVCN1:PTPN11:OAS2:HCAR2:SLC15A4:ANG:FBLN5:APBA2:ANXA2:RAB11A:BAIAP3:CPPED1:SYT17:NOD2:SMPD3:KARS:SREBF1:STAT5A:KPNB1:PRKCA:TMC6:LGALS3BP:CD97:CD22:PGLYRP1:OTOF:ANXA4:DYSF:RAB11FIP5:DPP4:SERPINE2:CAB39:SRC:CTSA:MMP9:DNAJC5:OPRL1:CACNA1I:DYNC1LI1:CCR1:PLD1:IL1RAP:BANK1…
Cluster 5	GO_bp	GO_NEGATIVE_REGULATION_OF_IMMUNE_SYSTEM_PROCESS	427	34	15.7933	2.38849e-05	0.00236715	TNFRSF14:GBP1:FCGR2B:C4BPA:CD55:SFTPD:NR1H3:SERPING1:TAPBPL:LAG3:TRAFD1:VIMP:NLRC5:TNFRSF13B:DUSP3:CD22:PGLYRP1:UBASH3A:PARP3:PARP14:APOD:BANK1:KIAA0922:PIK3R1:DUSP22:IRF4:FAM65B:EZR:IDO1:NOV:CD274:PDCD1LG2:ANXA1:TSC22D3
Cluster 5	GO_bp	GO_SMOOTH_MUSCLE_CELL_PROLIFERATION	130	16	4.80827	2.44522e-05	0.00236715	MTOR:LDLRAP1:JUN:PTGS2:TCF7L2:FGF9:ANG:RBPMS2:SMPD3:ALOX12:STAT1:MMP9:APOD:MEF2C:NOV:KLF4
Cluster 5	GO_bp	GO_INFLAMMATORY_RESPONSE	675	47	24.966	2.45314e-05	0.00236715	JUN:GBP5:TSPAN2:AIM2:FCGR2B:PTGS2:BLNK:NR1H3:CD6:FOS:RPS6KA5:VIMP:NOD2:KARS:FANCA:SPHK1:ICAM1:ACP5:CD97:PGLYRP1:IL18R1:IL18RAP:ACVR1:MMP9:GGT5:APOL3:APOL2:CCR1:IL1RAP:APOD:PF4V1:CXCL9:CXCL10:NFKB1:F12:BMP6:MAPK14:TREM1:NT5E:EPHX2:IDO1:POLB:RIPK2:NOV:GSDMD:ANXA1:KLF4
Cluster 5	GO_bp	GO_B_CELL_ACTIVATION	237	23	8.76586	2.47987e-05	0.00236715	FCGR2B:CR2:KLF6:BLNK:SWAP70:MS4A1:CXCR5:NOD2:TNFRSF13B:CD79B:BCL2:TCF3:CD22:CD79A:DOCK10:LGALS1:TNFRSF13C:PARP3:BANK1:LEF1:PIK3R1:MEF2C:MZB1
Cluster 5	GO_bp	GO_NEURON_DIFFERENTIATION	1322	78	48.8965	2.59779e-05	0.00244791	MTOR:PTCHD2:MACF1:JUN:MCOLN3:HIPK1:TSPAN2:PHGDH:EFNA1:RGS2:VIM:DDIT4:SUFU:ARL3:WEE1:EHD1:NCAM1:TCTN1:PTPN11:SPG20:RAP2A:NUMB:RPS6KA5:BCL11B:RAB11A:HDGFRP3:SOX8:SYT17:MT3:ZFHX3:SCARF1:GAS7:PMP22:PRKCA:BAIAP2:EPB41L3:CDH2:RNF165:TCF4:BCL2:TCF3:BCL11A:ZEB2:NR4A2:NCKAP1:DOCK10:ITM2C:JAG1:SRC:PLCG1:STMN3:YWHAH:LGALS1:TRAK1:ECT2:APOD:RAPGEF2:ZSWIM6:PIK3R1:MEF2C:CTNNA1:CYFIP2:BMP6:MYLIP:VEGFA:PTPRK:EZR:…
Cluster 5	GO_bp	GO_HUMORAL_IMMUNE_RESPONSE	239	23	8.83983	2.83435e-05	0.00261267	MASP2:C1QB:FCGR2B:C4BPA:CD55:CR2:CD46:SFTPD:BLNK:SERPING1:MS4A1:PSMB10:BCL2:FCER2:PGLYRP1:IGJ:PF4V1:CXCL9:CXCL10:MEF2C:CD83:TREM1:PAX5
Cluster 5	GO_bp	GO_LYMPHOCYTE_DIFFERENTIATION	341	29	12.6125	2.86007e-05	0.00261267	MTOR:ZNF683:FCGR2B:CR2:CD46:KLF6:ZMIZ1:BLNK:TESPA1:BCL11B:FANCA:CD79B:BCL2:TCF3:CD79A:PGLYRP1:CD8A:IL18R1:DOCK10:LGALS1:LEF1:KIAA0922:PIK3R1:ITK:PRELID1:IRF4:CD83:RIPK2:ANXA1
Cluster 5	GO_bp	GO_LYMPHOCYTE_COSTIMULATION	55	10	2.03427	2.87927e-05	0.00261267	TNFRSF14:PTPN11:DPP4:SRC:LGALS1:TNFRSF13C:BTLA:PIK3R1:CD274:PDCD1LG2
Cluster 5	GO_bp	GO_REGULATION_OF_INNATE_IMMUNE_RESPONSE	413	33	15.2755	2.92678e-05	0.00262339	GBP5:AIM2:FCGR2B:SH2D1B:SFTPD:NR1H3:SERPING1:LAG3:KRAS:TRAFD1:PTPN11:PSME1:PSME2:COCH:RPS6KA5:NOD2:NLRC5:PSMB10:PSMB3:ICAM2:LSM14A:PGLYRP1:IL18RAP:STAT1:WDFY1:SRC:PARP9:PARP14:TXK:NFKB1:ALPK1:IRF4:RIPK2
Cluster 5	GO_bp	GO_T_CELL_RECEPTOR_SIGNALING_PATHWAY	177	19	6.54665	3.12666e-05	0.00275874	GBP1:TESPA1:PSME1:PSME2:PSMB10:PSMB3:DUSP3:PLCG1:UBASH3A:TXK:NFKB1:FYB:PIK3R1:ITK:DUSP22:BTN3A1:BTN3A3:EZR:RIPK2
Cluster 5	GO_bp	GO_CELLULAR_RESPONSE_TO_FLUID_SHEAR_STRESS	18	6	0.665761	3.15284e-05	0.00275874	PTGS2:SRC:MEF2C:CA2:MTSS1:KLF4
Cluster 5	GO_bp	GO_CYTOKINE_SECRETION	209	21	7.73023	3.30956e-05	0.00286179	TNFRSF14:GBP1:GBP5:CD58:AIM2:FCGR2B:CASP1:NOD2:KARS:ANXA4:DYSF:SRC:IL1RAP:BANK1:BTN3A1:MAPK14:EZR:RIPK2:GSDMD:CD274:ANXA1
Cluster 5	GO_bp	GO_RESPONSE_TO_BIOTIC_STIMULUS	928	59	34.3237	3.42028e-05	0.00292315	TNFRSF14:IFNLR1:JUN:IL12RB2:IFI44L:GBP1:GBP5:ADAM15:AIM2:FCGR2B:PTGS2:CD55:VIM:DDIT4:SFTPD:ABCC8:NR1H3:MS4A1:CD6:BATF2:IL18BP:CASP1:OAS2:CEBPE:COCH:FOS:VIMP:NOD2:NLRC5:IRF8:CD79B:PRKCA:BAIAP2:BCL2:ICAM1:ACP5:JUND:LSM14A:PGLYRP1:STAT1:SRC:PARP9:IGJ:PF4V1:CXCL9:CXCL10:BANK1:NFKB1:MEF2C:IRF4:BMP6:MAPK14:SASH1:IDO1:RIPK2:GSDMD:CD274:PDCD1LG2:NFIB
Cluster 5	GO_bp	GO_BLOOD_VESSEL_MORPHOGENESIS	568	41	21.0085	3.61063e-05	0.00305036	JUN:HIPK1:WARS2:ADAM15:EFNA1:PTGS2:ZMIZ1:PIK3C2A:ABCC8:ITGA5:FGF9:ANG:WARS:SLC12A6:ANXA2:PRKCA:SPHK1:CDH2:RHOB:CYP1B1:DYSF:ACVR1:STAT1:JAG1:ISM1:PLCG1:LAMA5:TIPARP:APOD:CXCL10:LEF1:EGF:RAPGEF2:MAPK14:VEGFA:SASH1:HIPK2:EPHA1:NOV:ANXA1:KLF4
Cluster 5	GO_bp	GO_NEGATIVE_REGULATION_OF_ANTIGEN_RECEPTOR_MEDIATED_SIGNALING_PATHWAY	27	7	0.998642	4.23419e-05	0.00353651	GBP1:FCGR2B:DUSP3:CD22:UBASH3A:DUSP22:EZR
Cluster 5	GO_bp	GO_NEGATIVE_REGULATION_OF_LYMPHOCYTE_ACTIVATION	136	16	5.0302	4.28561e-05	0.00353924	TNFRSF14:FCGR2B:SFTPD:LAG3:TNFRSF13B:DUSP3:PGLYRP1:PARP3:BANK1:KIAA0922:DUSP22:FAM65B:IDO1:CD274:PDCD1LG2:ANXA1
Cluster 5	GO_bp	GO_ENZYME_LINKED_RECEPTOR_PROTEIN_SIGNALING_PATHWAY	999	62	36.9497	4.38278e-05	0.00357927	JUN:SORT1:EFNA1:VIM:BAMBI:DDIT4:BLNK:PIK3C2A:NUMA1:ITGA5:SH2B3:PTPN11:FGF9:SPG20:FOS:RPS6KA5:RBPMS2:TMEM204:MT3:SMPD3:SREBF1:STAT5A:DUSP3:PRKCA:BAIAP2:CD7:RNF165:FUZ:CD8A:ACVR1:NCKAP1:IGFBP2:SRC:PLCG1:MMP9:SULF2:PMEPA1:TIPARP:VEPH1:APOD:LEF1:EGF:RAPGEF2:FST:PIK3R1:MZB1:ADRB2:CYFIP2:FGFR4:DUSP22:BMP6:MAPK14:VEGFA:PTPRK:GRB10:PTPN12:LMTK2:HIPK2:EPHA1:BLK:NOV:MTSS1
Cluster 5	GO_bp	GO_CELL_SUBSTRATE_JUNCTION_ASSEMBLY	95	13	3.51374	4.57368e-05	0.00365246	MACF1:S100A10:LAMC1:SLK:ITGA5:DUSP3:BCL2:SRC:LAMA5:APOD:DUSP22:VEGFA:PTPRK
Cluster 5	GO_bp	GO_NEGATIVE_REGULATION_OF_CELL_ACTIVATION	182	19	6.73158	4.59895e-05	0.00365246	TNFRSF14:FCGR2B:SFTPD:NR1H3:LAG3:ALOX12:TNFRSF13B:DUSP3:PGLYRP1:SERPINE2:PARP3:BANK1:KIAA0922:DUSP22:FAM65B:IDO1:CD274:PDCD1LG2:ANXA1
Cluster 5	GO_bp	GO_REGULATION_OF_IMMUNE_EFFECTOR_PROCESS	368	30	13.6111	4.62148e-05	0.00365246	TNFRSF14:C1QB:IFNLR1:ZNF683:AIM2:FCGR2B:SH2D1B:C4BPA:CD55:CR2:CD46:SERPING1:LAG3:NOD2:KARS:FCER2:CD22:CLC:PGLYRP1:IL18R1:IL18RAP:STAT1:PARP3:PARP9:MZB1:DUSP22:IRF4:MAPK14:RIPK2:ANXA1
Cluster 5	GO_bp	GO_RESPONSE_TO_REACTIVE_OXYGEN_SPECIES	215	21	7.95215	5.02383e-05	0.00392821	JUN:AKR1C3:IL18BP:UCP2:FOS:FBLN5:MT3:SMPD3:SPHK1:BCL2:RHOB:CYP1B1:IL18RAP:STAT1:SRC:MMP9:ECT2:APOD:PTPRK:ANXA1:KLF4
Cluster 5	GO_bp	GO_CELL_JUNCTION_ORGANIZATION	282	25	10.4303	5.11415e-05	0.00395673	MACF1:INADL:HIPK1:S100A10:LAMC1:SLK:ABCC8:ITGA5:ANG:NUMB:DUSP3:PRKCA:EPB41L3:CDH2:BCL2:SRC:LAMA5:ECT2:APOD:RAPGEF2:CTNNA1:DUSP22:VEGFA:PTPRK:DFNB31
Cluster 5	GO_bp	GO_POSITIVE_REGULATION_OF_LEUKOCYTE_APOPTOTIC_PROCESS	28	7	1.03563	5.46671e-05	0.00417361	HCAR2:RAPGEF2:MEF2C:PRELID1:IDO1:CD274:ANXA1
Cluster 5	GO_bp	GO_POSITIVE_REGULATION_OF_DEVELOPMENTAL_PROCESS	1308	76	48.3786	5.50803e-05	0.00417361	MTOR:MACF1:JUN:HIPK1:S100A10:LMNA:PTGS2:RGS2:CD46:BAMBI:ZMIZ1:TCF7L2:PIK3C2A:EHD1:LTBP3:NUMA1:KRAS:ITGA5:TESPA1:FGF9:WDFY2:NUMB:FOS:ANXA2:RAB11A:SOX8:SYT17:SCARF1:ALOX12:AXIN2:PRKCA:SPHK1:CDH2:TCF4:BCL2:TCF3:JUND:RHOB:CYP1B1:ZEB2:ACVR1:STAT1:SERPINE2:JAG1:SRC:PLCG1:TNFRSF13C:TRAK1:CCR1:ECT2:IL1RAP:CXCL9:NFKB1:LEF1:EGF:RAPGEF2:FST:MEF2C:CTNNA1:ADRB2:BMP6:CD83:FAM65B:MAPK14:VEGFA:SASH1:EZR:TMEM106B…
Cluster 5	GO_bp	GO_ADHERENS_JUNCTION_ORGANIZATION	139	16	5.14116	5.59877e-05	0.00419908	MACF1:HIPK1:S100A10:SLK:ANG:NUMB:DUSP3:CDH2:BCL2:SRC:LAMA5:APOD:CTNNA1:DUSP22:VEGFA:PTPRK
Cluster 5	GO_bp	GO_CELLULAR_RESPONSE_TO_REACTIVE_OXYGEN_SPECIES	154	17	5.69596	5.65949e-05	0.00420175	JUN:AKR1C3:IL18BP:FOS:FBLN5:MT3:SMPD3:SPHK1:RHOB:CYP1B1:IL18RAP:SRC:MMP9:ECT2:PTPRK:ANXA1:KLF4
Cluster 5	GO_bp	GO_ASTRAL_MICROTUBULE_ORGANIZATION	7	4	0.258907	5.90783e-05	0.00434225	NUMA1:RAB11A:KPNB1:EZR
Cluster 5	GO_bp	GO_POSITIVE_REGULATION_OF_LOCOMOTION	523	38	19.3441	6.03024e-05	0.00438835	TNFRSF14:MTOR:JUN:PTGS2:SWAP70:PIK3C2A:ITGA5:FGF9:SYNE2:NUMB:RAB11A:KARS:ALOX12:STAT5A:PRKCA:SPHK1:BCL2:ICAM1:RHOB:DYSF:ACVR1:SRC:PLCG1:MMP9:CCR1:CXCL10:LEF1:EGF:RAPGEF2:PIK3R1:SH3RF2:FAM65B:MAPK14:VEGFA:SASH1:EPHA1:CD274:ANXA1
Cluster 5	GO_bp	GO_NEGATIVE_REGULATION_OF_CYTOKINE_PRODUCTION	251	23	9.28367	6.09487e-05	0.00439189	GBP1:FCGR2B:SFTPD:UBE2L6:LAG3:RPS6KA5:VIMP:NLRC5:ACP5:PGLYRP1:ANXA4:UBA7:APOD:BANK1:NFKB1:LEF1:CD83:EZR:IDO1:CD274:PDCD1LG2:ANXA1:KLF4
Cluster 5	GO_bp	GO_REGULATION_OF_SECRETION	766	50	28.3318	7.14999e-05	0.00509061	TNFRSF14:TARDBP:GBP1:CD58:AIM2:FCGR2B:CACNA1E:TCF7L2:KCNJ11:ABCC8:NR1H3:UCP2:CASP1:PTPN11:OAS2:HCAR2:ANG:APBA2:BAIAP3:SYT17:NOD2:SMPD3:KARS:SREBF1:PRKCA:CD22:ANXA4:RAB11FIP5:DPP4:SRC:OPRL1:CACNA1I:IL1RAP:BANK1:EGF:ANXA5:SLC25A4:NDUFAF2:MEF2C:MCTP1:BMP6:MAPK14:STXBP5:EZR:BLK:RIPK2:NOV:GSDMD:CD274:ANXA1
Cluster 5	GO_bp	GO_CELLULAR_COMPONENT_MORPHOGENESIS	1102	66	40.7594	7.2418e-05	0.00509061	MACF1:GBP1:S100A10:EFNA1:LAMC1:OBSCN:BAMBI:WEE1:NCAM1:TCTN1:PTPN11:RILPL2:SPG20:RAP2A:COCH:NUMB:RPS6KA5:BCL11B:RAB11A:SYT17:MT3:PSMB10:GAS7:PMP22:PRKCA:BAIAP2:EPB41L3:CDH2:RNF165:BCL2:RFX2:ICAM1:RHOB:BCL11A:ZEB2:NR4A2:NCKAP1:DOCK10:SRC:PLCG1:LAMA5:YWHAH:PACSIN2:TRAK1:ECT2:WDR19:LEF1:RAPGEF2:ZSWIM6:PIK3R1:MEF2C:RHOBTB3:SNX2:CYFIP2:MAPK14:VEGFA:EZR:TMEM106B:GRB10:EPHA1:CNTNAP2:SGK223:DPYSL2:NFIB:AN…
Cluster 5	GO_bp	GO_REGULATION_OF_ANTIGEN_RECEPTOR_MEDIATED_SIGNALING_PATHWAY	61	10	2.25619	7.2723e-05	0.00509061	GBP1:FCGR2B:TESPA1:DUSP3:CD22:UBASH3A:DUSP22:EZR:BLK:PAX5
Cluster 5	GO_bp	GO_NEUROGENESIS	1564	87	57.8472	7.40423e-05	0.00513407	MTOR:PTCHD2:MACF1:JUN:MCOLN3:HIPK1:TSPAN2:PHGDH:EFNA1:RGS2:VIM:DDIT4:SUFU:ARL3:WEE1:ABCC8:EHD1:NCAM1:KRAS:TCTN1:PTPN11:SPG20:RAP2A:SYNE2:NUMB:RPS6KA5:BCL11B:RAB11A:HDGFRP3:SOX8:SYT17:MT3:ZFHX3:SCARF1:GAS7:PMP22:PRKCA:BAIAP2:EPB41L3:APCDD1:CDH2:RNF165:TCF4:BCL2:TCF3:BCL11A:ZEB2:NR4A2:NCKAP1:SERPINE2:DOCK10:ITM2C:JAG1:SRC:PLCG1:STMN3:YWHAH:LGALS1:BHLHE40:TRAK1:ECT2:APOD:LEF1:RAPGEF2:ZSWIM6:PIK3R1:M…
Cluster 5	GO_bp	GO_POSITIVE_REGULATION_OF_LYMPHOCYTE_ACTIVATION	255	23	9.43162	7.7651e-05	0.00533397	TNFRSF14:CD55:CD46:ZMIZ1:CD6:TESPA1:PTPN11:NOD2:BCL2:DPP4:IGFBP2:SIRPG:SRC:LGALS1:TNFRSF13C:BTLA:PIK3R1:MEF2C:CD83:RIPK2:CD274:PDCD1LG2:ANXA1
Cluster 5	GO_bp	GO_REGULATION_OF_CELLULAR_PROTEIN_LOCALIZATION	511	37	18.9002	8.07163e-05	0.00549319	TARDBP:LDLRAP1:SH3GLB1:GBP1:LMNA:PTGS2:RASSF5:SUFU:TRIM8:TCF7L2:KCNJ11:NUMA1:PTPN11:NUMB:RAB11A:SREBF1:CDH2:BCL2:YWHAQ:RAB11FIP5:TM9SF4:TP53INP2:SRC:YWHAH:PARP9:ECT2:APOD:EGF:PIK3R1:FAM65B:MAPK14:UBE2J1:EZR:MDFIC:INSIG1:LEPROTL1:GSN
Cluster 5	GO_bp	GO_POSITIVE_REGULATION_OF_CELL_CELL_ADHESION	240	22	8.87682	8.7025e-05	0.0058542	TNFRSF14:CD55:CD46:ZMIZ1:CD6:TESPA1:PTPN11:NOD2:ICAM1:DPP4:IGFBP2:SIRPG:SRC:LGALS1:TNFRSF13C:BTLA:PIK3R1:CD83:RIPK2:CD274:PDCD1LG2:ANXA1
Cluster 5	GO_bp	GO_REGULATION_OF_LEUKOCYTE_PROLIFERATION	207	20	7.65625	8.76139e-05	0.0058542	TNFRSF14:FCGR2B:CD55:CD46:SFTPD:CD6:TNFRSF13B:BCL2:CD22:CLC:IGFBP2:TNFRSF13C:KIAA0922:MEF2C:MZB1:IDO1:RIPK2:CD274:PDCD1LG2:ANXA1
Cluster 5	GO_bp	GO_ADHERENS_JUNCTION_ASSEMBLY	88	12	3.25483	9.21423e-05	0.00610132	MACF1:HIPK1:S100A10:SLK:DUSP3:BCL2:SRC:LAMA5:APOD:DUSP22:VEGFA:PTPRK
Cluster 5	GO_bp	GO_CELLULAR_RESPONSE_TO_DRUG	347	28	12.8344	9.77522e-05	0.00640284	ADAM15:AIM2:PTGS2:VIM:DDIT4:KCNJ11:KCNC1:IL18BP:CD69:RAP2A:NOD2:MT3:SMPD3:SPHK1:ICAM1:RHOB:CYP1B1:BCL11A:IL18RAP:SRC:XRN1:ECT2:NFKB1:MEF2C:CTNNA1:RIPK2:ANXA1:KLF4
Cluster 5	GO_bp	GO_REGULATION_OF_RESPONSE_TO_EXTERNAL_STIMULUS	735	48	27.1852	9.84382e-05	0.00640284	MTOR:IFNLR1:GBP5:AIM2:FCGR2B:PTGS2:CD55:SWAP70:NUCB2:ABCC8:NR1H3:SERPING1:CD6:ANXA2:VIMP:NOD2:MT3:KARS:FANCA:SCARF1:ALOX12:DUSP3:PRKCA:ACP5:PGLYRP1:DYSF:STAT1:SERPINE2:MMP9:CCR1:PARP9:APOD:CXCL10:NFKB1:ANXA5:ZSWIM6:F12:BMP6:FAM65B:MAPK14:VEGFA:NT5E:SASH1:IDO1:RIPK2:NOV:ANXA1:KLF4
Cluster 5	GO_bp	GO_RESPONSE_TO_DRUG	986	60	36.4689	0.000100824	0.00650048	MTOR:JUN:S100A10:ADAM15:AIM2:PTGS2:RGS2:VIM:DDIT4:KCNJ11:ABCC8:KCNC1:NR1H3:IL18BP:CD69:PTPN11:SLC15A4:SLC7A1:RAP2A:FOS:SYT17:NOD2:MT3:SMPD3:SREBF1:RGS9:SPHK1:TGIF1:BCL2:ICAM1:JUND:CYP2S1:FOSB:RHOB:CYP1B1:BCL11A:IL18RAP:NR4A2:STAT1:IGFBP2:JAG1:SRC:RGS19:LGALS1:XPC:XRN1:ECT2:APOD:NFKB1:SLC25A4:MEF2C:CTNNA1:MAPK14:IPCEF1:POLB:CA2:RIPK2:ANXA1:KLF4:GSN
Cluster 5	GO_bp	GO_NEGATIVE_REGULATION_OF_CELL_CELL_ADHESION	162	17	5.99185	0.000106714	0.00682039	TNFRSF14:FCGR2B:SFTPD:SWAP70:LAG3:ALOX12:DUSP3:SERPINE2:JAG1:KIAA0922:DUSP22:FAM65B:IDO1:CD274:PDCD1LG2:ANXA1:KLF4
Cluster 5	GO_bp	GO_LYMPHOCYTE_MEDIATED_IMMUNITY	227	21	8.39599	0.000109812	0.0069579	MASP2:C1QB:FCGR2B:SH2D1B:C4BPA:CD55:CR2:CD46:SWAP70:SERPING1:LAG3:FCER2:ICAM1:CLC:CD8A:IL18R1:IL18RAP:JAG1:PARP3:DUSP22:BTN3A3
Cluster 5	GO_bp	GO_AXON_DEVELOPMENT	500	36	18.4934	0.000112374	0.00705942	MACF1:JUN:TSPAN2:EFNA1:NCAM1:TCTN1:PTPN11:SPG20:NUMB:RPS6KA5:BCL11B:RAB11A:MT3:SCARF1:PRKCA:BAIAP2:CDH2:RNF165:BCL2:ZEB2:NR4A2:SRC:PLCG1:TRAK1:APOD:ZSWIM6:PIK3R1:CTNNA1:CYFIP2:VEGFA:EZR:GRB10:EPHA1:DPYSL2:NFIB:KLF4
Cluster 5	GO_bp	GO_NEURON_DEVELOPMENT	1076	64	39.7977	0.000113705	0.00708249	MTOR:MACF1:JUN:TSPAN2:PHGDH:EFNA1:RGS2:VIM:ARL3:WEE1:EHD1:NCAM1:TCTN1:PTPN11:SPG20:RAP2A:NUMB:RPS6KA5:BCL11B:RAB11A:HDGFRP3:SYT17:MT3:SCARF1:GAS7:PMP22:PRKCA:BAIAP2:EPB41L3:CDH2:RNF165:BCL2:BCL11A:ZEB2:NR4A2:NCKAP1:DOCK10:ITM2C:SRC:PLCG1:STMN3:YWHAH:LGALS1:TRAK1:APOD:RAPGEF2:ZSWIM6:PIK3R1:MEF2C:CTNNA1:CYFIP2:MYLIP:VEGFA:PTPRK:EZR:TMEM106B:GRB10:EPHA1:CNTNAP2:SGK223:DPYSL2:NFIB:KLF4:DFNB31
Cluster 5	GO_bp	GO_TISSUE_MIGRATION	279	24	10.3193	0.000114757	0.00708793	MTOR:MACF1:JUN:EFNA1:PTGS2:PIK3C2A:PTPN11:RAB11A:ALOX12:STAT5A:PRKCA:RHOB:CYP1B1:ZEB2:DPP4:SRC:PLCG1:MMP9:MEF2C:VEGFA:SASH1:NOV:ANXA1:KLF4
Cluster 5	GO_bp	GO_PHAGOCYTOSIS	245	22	9.06175	0.000117706	0.00720948	FCGR1A:FCGR2B:C4BPA:IL15RA:SFTPD:NR1H3:RAB20:CEBPE:IRF8:BAIAP2:DYSF:NCKAP1:SIRPG:TM9SF4:SRC:PLCG1:IL2RB:PIK3R1:CYFIP2:TXNDC5:ANXA1:GSN
Cluster 5	GO_bp	GO_VASCULAR_ENDOTHELIAL_GROWTH_FACTOR_RECEPTOR_SIGNALING_PATHWAY	91	12	3.36579	0.000127988	0.00777448	ITGA5:FGF9:TMEM204:MT3:BAIAP2:NCKAP1:SRC:PIK3R1:CYFIP2:MAPK14:VEGFA:GRB10
Cluster 5	GO_bp	GO_MYELOID_LEUKOCYTE_DIFFERENTIATION	197	19	7.28639	0.000133552	0.00804596	MTOR:JUN:TSPAN2:BATF2:CEBPE:FOS:ANXA2:PRKCA:SRC:MMP9:CCR1:LEF1:PIK3R1:MEF2C:IRF4:MAPK14:VEGFA:L3MBTL3:CA2
Cluster 5	GO_bp	GO_PROTEIN_PHOSPHORYLATION	1889	100	69.8679	0.000137483	0.00821542	TNFRSF14:TARDBP:MTOR:JUN:IL12RB2:GBP1:FAM212B:HIPK1:EFNA1:FCGR2B:PTGS2:RGS2:ATP2B4:OBSCN:RASGEF1A:DDIT4:SLK:WEE1:HIPK3:NCAM1:CCND2:KRAS:ITGA5:NUAK1:BRAP:MAPKAPK5:PTPN11:CDK2AP1:FGF9:WDFY2:RAP2A:ANG:PSME1:PSME2:RPS6KA5:TCL1B:TCL1A:WARS:ANXA2:NOD2:MT3:PSMB10:SMPD3:MLKL:KARS:PSMB3:DUSP3:HEXIM2:AXIN2:PRKCA:SPHK1:PPP4R1:CDH2:BCL2:GADD45B:ICAM1:DYRK1B:MAPRE3:ZEB2:ACVR1:CAB39:SRC:MMP9:PMEPA1:DUSP18:IL2R…
Cluster 5	GO_bp	GO_CARDIOVASCULAR_SYSTEM_DEVELOPMENT	686	45	25.3729	0.000146371	0.00867601	JUN:HIPK1:WARS2:ADAM15:EFNA1:PTGS2:ZMIZ1:SUFU:TCF7L2:PIK3C2A:ABCC8:ITGA5:FGF9:ANG:WARS:SLC12A6:ANXA2:TMEM204:PRKCA:SPHK1:CDH2:RHOB:CYP1B1:DYSF:ACVR1:STAT1:JAG1:ISM1:PLCG1:LAMA5:TIPARP:APOD:CXCL10:LEF1:EGF:RAPGEF2:MEF2C:MAPK14:VEGFA:SASH1:HIPK2:EPHA1:NOV:ANXA1:KLF4
Cluster 5	GO_bp	GO_POSITIVE_REGULATION_OF_VASCULAR_ENDOTHELIAL_GROWTH_FACTOR_RECEPTOR_SIGNALING_PATHWAY	15	5	0.554801	0.000149449	0.0087876	ITGA5:FGF9:MT3:VEGFA:GRB10
Cluster 5	GO_bp	GO_CELL_PART_MORPHOGENESIS	669	44	24.7441	0.000163347	0.00952857	MACF1:EFNA1:WEE1:NCAM1:TCTN1:PTPN11:SPG20:RAP2A:NUMB:RPS6KA5:BCL11B:RAB11A:SYT17:MT3:GAS7:PRKCA:BAIAP2:EPB41L3:CDH2:RNF165:BCL2:BCL11A:ZEB2:NR4A2:NCKAP1:DOCK10:SRC:PLCG1:YWHAH:PACSIN2:TRAK1:RAPGEF2:ZSWIM6:PIK3R1:SNX2:CYFIP2:VEGFA:EZR:TMEM106B:GRB10:EPHA1:CNTNAP2:DPYSL2:NFIB
Cluster 5	GO_bp	GO_CELL_JUNCTION_ASSEMBLY	234	21	8.65489	0.000168163	0.00973225	MACF1:INADL:HIPK1:S100A10:LAMC1:SLK:ITGA5:DUSP3:PRKCA:EPB41L3:CDH2:BCL2:SRC:LAMA5:ECT2:APOD:RAPGEF2:CTNNA1:DUSP22:VEGFA:PTPRK
Cluster 5	GO_bp	GO_APOPTOTIC_PROCESS	1878	99	69.4611	0.000173794	0.00997956	TNFRSF25:TARDBP:MTOR:JUN:SH3GLB1:SORT1:HIPK1:MCL1:EFNA1:LMNA:AIM2:PTGS2:RASSF5:OBSCN:AKR1C3:DDIT4:SLK:TCF7L2:HIPK3:LGALS12:UCP2:CASP1:CCND2:KRAS:ITGA5:HRK:HCAR2:GZMH:GPR65:TCL1A:BCL11B:CRIP1:CRIP1:RMDN3:VIMP:SOX8:NOD2:MT3:HERPUD1:ALOX12:KPNB1:PRKCA:SPHK1:EPB41L3:BCL2:GADD45B:ICAM1:CLC:YWHAQ:RHOB:CYP1B1:ANXA4:MAL:NR4A2:ACVR1:CDCA7:NCKAP1:SLC40A1:STAT1:ITM2C:SRC:PLCG1:MMP9:TNFRSF6B:DNAJC5:YWHAH:IL2…
Cluster 5	GO_bp	GO_TUMOR_NECROSIS_FACTOR_MEDIATED_SIGNALING_PATHWAY	153	16	5.65897	0.000175613	0.0100058	TNFRSF14:TNFRSF25:HIPK1:AIM2:CASP1:PSME1:PSME2:TNFRSF17:PSMB10:KARS:TNFRSF13B:PSMB3:SPHK1:STAT1:TNFRSF6B:TNFRSF13C
Cluster 5	GO_bp	GO_POSITIVE_REGULATION_OF_EPITHELIAL_CELL_MIGRATION	138	15	5.10417	0.000181	0.0102335	MTOR:JUN:PTGS2:PIK3C2A:RAB11A:ALOX12:STAT5A:PRKCA:RHOB:SRC:PLCG1:MMP9:VEGFA:SASH1:ANXA1
Cluster 5	GO_bp	GO_B_CELL_RECEPTOR_SIGNALING_PATHWAY	56	9	2.07126	0.00019439	0.0108982	FCGR2B:CD79B:BCL2:CD22:CD79A:MEF2C:ITK:BLK:PAX5
Cluster 5	GO_bp	GO_LEUKOCYTE_MIGRATION	418	31	15.4605	0.000196974	0.0108982	TNFRSF14:CD58:SFTPD:SWAP70:AMICA1:CXCR5:ITGA5:PTPN11:SLC7A6:SMPD3:KARS:ICAM1:DYSF:SIRPG:SRC:PLCG1:MMP9:VPREB3:CCR1:APOD:IGJ:PF4V1:CXCL9:CXCL10:PIK3R1:FAM65B:MAPK14:TREM1:VEGFA:NOV:ANXA1
Cluster 5	GO_bp	GO_PROTEIN_LOCALIZATION_TO_CELL_PERIPHERY	307	25	11.3549	0.000197205	0.0108982	LDLRAP1:MACF1:GBP1:S100A10:ARL3:KCNJ11:NUMA1:CLIP1:RILPL2:RAP2A:NUMB:TTC7B:ANXA2:RAB11A:EPB41L3:CDH2:TTC7A:VAMP5:MAL:LAMA5:ZDHHC23:RAPGEF2:FYB:PIK3R1:EZR
Cluster 5	GO_bp	GO_REGULATION_OF_PROTEIN_LOCALIZATION_TO_NUCLEUS	110	13	4.06854	0.000209485	0.0114904	TARDBP:LMNA:PTGS2:RASSF5:SUFU:TRIM8:SRC:PARP9:ECT2:APOD:PIK3R1:MAPK14:MDFIC
Cluster 5	GO_bp	GO_NEGATIVE_REGULATION_OF_PEPTIDE_HORMONE_SECRETION	45	8	1.6644	0.000213708	0.0115783	KCNJ11:ABCC8:UCP2:PTPN11:SREBF1:ANXA5:NDUFAF2:NOV
Cluster 5	GO_bp	GO_RESPONSE_TO_OXIDATIVE_STRESS	420	31	15.5344	0.000214239	0.0115783	ANGPTL7:JUN:MCL1:PTGS2:AKR1C3:MSRB2:PDLIM1:IL18BP:UCP2:FOS:FBLN5:VIMP:MT3:SMPD3:SPHK1:BCL2:RHOB:CYP1B1:IL18RAP:NR4A2:STAT1:SRC:MMP9:ECT2:APOD:ERCC8:MCTP1:PTPRK:IPCEF1:ANXA1:KLF4
Cluster 5	GO_bp	GO_POSITIVE_REGULATION_OF_CELL_ADHESION	383	29	14.1659	0.00022147	0.0118818	TNFRSF14:S100A10:CD55:CD46:ZMIZ1:CD6:ITGA5:TESPA1:PTPN11:NOD2:ZFHX3:PRKCA:ICAM1:DYSF:DPP4:IGFBP2:SIRPG:SRC:LGALS1:TNFRSF13C:BTLA:PIK3R1:CD83:VEGFA:EPHA1:RIPK2:CD274:PDCD1LG2:ANXA1
Cluster 5	GO_bp	GO_REGULATION_OF_RESPONSE_TO_INTERFERON_GAMMA	25	6	0.924668	0.000241123	0.0128424	NR1H3:NLRC5:STAT1:PARP9:PARP14:TXK
Cluster 5	GO_bp	GO_REGULATION_OF_CELL_MATRIX_ADHESION	112	13	4.14251	0.000250946	0.0132695	MACF1:S100A10:ADAM15:SLK:DUSP3:BCL2:JAG1:SRC:APOD:PIK3R1:DUSP22:VEGFA:EPHA1
Cluster 5	GO_bp	GO_ENTRY_INTO_OTHER_ORGANISM_INVOLVED_IN_SYMBIOTIC_INTERACTION	128	14	4.7343	0.000275598	0.0144689	TNFRSF14:CD55:CR2:CD46:TRIM8:TRIM21:NCAM1:ITGA5:ICAM1:DPP4:SRC:LGALS1:WWP1:GSN
Cluster 5	GO_bp	GO_SIGNAL_TRANSDUCTION_BY_PROTEIN_PHOSPHORYLATION	917	55	33.9168	0.000281551	0.0146766	JUN:GBP1:EFNA1:FCGR2B:RGS2:RASGEF1A:SLK:HIPK3:NCAM1:KRAS:BRAP:MAPKAPK5:PTPN11:FGF9:RAP2A:PSME1:PSME2:NOD2:MT3:PSMB10:MLKL:KARS:PSMB3:DUSP3:PRKCA:CDH2:GADD45B:ICAM1:ZEB2:CAB39:SRC:DUSP18:IL2RB:CCR1:RELL1:BANK1:NFKB1:EGF:RAPGEF2:RASGRF2:MEF2C:SH3RF2:ADRB2:FGFR4:DUSP22:BMP6:MAPK14:VEGFA:SASH1:EZR:CALCR:MDFIC:HIPK2:RIPK2:KLF4
Cluster 5	GO_bp	GO_REGULATION_OF_LEUKOCYTE_APOPTOTIC_PROCESS	85	11	3.14387	0.000286512	0.01483	EFNA1:HCAR2:VIMP:NOD2:RAPGEF2:MEF2C:PRELID1:IDO1:CD274:ANXA1:TSC22D3
Cluster 5	GO_bp	GO_FC_RECEPTOR_SIGNALING_PATHWAY	177	17	6.54665	0.000310912	0.0159804	JUN:FCGR1B:FCGR1A:FCGR2B:PSME1:PSME2:FOS:PSMB10:PSMB3:BAIAP2:NCKAP1:SRC:PLCG1:NFKB1:PIK3R1:ITK:CYFIP2
Cluster 5	GO_bp	GO_TRANSMEMBRANE_RECEPTOR_PROTEIN_TYROSINE_KINASE_SIGNALING_PATHWAY	690	44	25.5208	0.000319693	0.0163177	SORT1:EFNA1:DDIT4:BLNK:PIK3C2A:ITGA5:SH2B3:PTPN11:FGF9:RPS6KA5:TMEM204:MT3:SMPD3:SREBF1:STAT5A:DUSP3:PRKCA:BAIAP2:CD7:FUZ:CD8A:NCKAP1:IGFBP2:SRC:PLCG1:MMP9:SULF2:TIPARP:APOD:EGF:RAPGEF2:PIK3R1:MZB1:ADRB2:CYFIP2:FGFR4:MAPK14:VEGFA:GRB10:PTPN12:LMTK2:EPHA1:BLK:MTSS1
Cluster 5	GO_bp	GO_POSITIVE_REGULATION_OF_DEFENSE_RESPONSE	469	33	17.3468	0.000324824	0.0164557	GBP5:AIM2:SH2D1B:PTGS2:SFTPD:NR1H3:CD6:LAG3:KRAS:PSME1:PSME2:COCH:RPS6KA5:NOD2:NLRC5:PSMB10:KARS:PSMB3:ICAM2:LSM14A:PGLYRP1:IL18RAP:WDFY1:SRC:PARP9:TXK:NFKB1:ALPK1:MEF2C:F12:IRF4:IDO1:RIPK2
Cluster 5	GO_bp	GO_CHEMICAL_HOMEOSTASIS	1140	65	42.1649	0.000326875	0.0164557	PTCHD2:LDLRAP1:MCOLN3:ATP2B4:CD55:HKDC1:SFTPD:SFXN2:CNNM2:TCF7L2:SWAP70:KCNJ11:ABCC8:NR1H3:EHD1:UCP2:CXCR5:ATP2B1:HECTD4:PTPN11:RAB20:SLC22A17:GPR65:CKB:SLC12A6:RMDN3:ANXA2:RAB11A:BAIAP3:MT3:HERPUD1:ALOX12:KCNJ2:BCL2:ICAM1:TTC7A:RAB11FIP5:SLC40A1:STAT1:TM9SF4:SRC:PLCG1:OPRL1:ABCG1:LGALS1:CCR1:TRPC1:CXCL9:CXCL10:SLC39A8:ANXA5:NDUFAF2:PIK3R1:KLHL3:FGFR4:BMP6:MYLIP:VEGFA:SLC29A1:CALCR:INSIG1:EPHX2:C…
Cluster 5	GO_bp	GO_REGULATION_OF_PHOSPHORUS_METABOLIC_PROCESS	1612	86	59.6226	0.000329144	0.0164572	TNFRSF14:TARDBP:MTOR:RCAN3:SPOCD1:JUN:GBP1:FAM212B:EFNA1:FCGR2B:PTGS2:RGS2:ATP2B4:DDIT4:SLK:SWAP70:HIPK3:CCND2:KRAS:ITGA5:NUAK1:MAPKAPK5:PTPN11:CDK2AP1:FGF9:WDFY2:RAP2A:ANG:RPS6KA5:TCL1B:TCL1A:WARS:ANXA2:NOD2:MT3:NLRC5:SMPD3:MLKL:KARS:DUSP3:HEXIM2:AXIN2:PRKCA:SPHK1:PPP4R1:CDH2:BCL2:GADD45B:ICAM1:MAPRE3:ZEB2:ACVR1:CAB39:SRC:MMP9:PMEPA1:DUSP18:CCR1:PARP9:PARP14:ECT2:LDB2:RELL1:CXCL10:BANK1:EGF:RAPG…
Cluster 5	GO_bp	GO_REGULATION_OF_MUSCLE_CELL_DIFFERENTIATION	146	15	5.40006	0.000336009	0.016687	MTOR:RGS2:EHD1:FGF9:RBPMS2:CDH2:BCL2:TCF3:CXCL9:CXCL10:MEF2C:CTNNA1:FAM65B:MAPK14:NOV
Cluster 5	GO_bp	GO_INTERLEUKIN_10_PRODUCTION	48	8	1.77536	0.000339387	0.0167416	FCGR2B:CD46:NOD2:IRF4:CD83:IDO1:CD274:PDCD1LG2
Cluster 5	GO_bp	GO_REGULATION_OF_EPITHELIAL_CELL_MIGRATION	212	19	7.84119	0.000343728	0.0168427	MTOR:MACF1:JUN:EFNA1:PTGS2:PIK3C2A:RAB11A:ALOX12:STAT5A:PRKCA:RHOB:SRC:PLCG1:MMP9:MEF2C:VEGFA:SASH1:ANXA1:KLF4
Cluster 5	GO_bp	GO_POSITIVE_REGULATION_OF_BINDING	179	17	6.62062	0.000354772	0.0171767	S100A10:BAMBI:TCF7L2:ANXA2:HERPUD1:MED25:MAPRE3:MMP9:PARP9:EGF:RAPGEF2:MEF2C:IRF4:FAM65B:HIPK2:RIPK2:KLF4
Cluster 5	GO_bp	GO_NEGATIVE_REGULATION_OF_LEUKOCYTE_CELL_CELL_ADHESION	116	13	4.29046	0.000355221	0.0171767	TNFRSF14:FCGR2B:SFTPD:LAG3:DUSP3:KIAA0922:DUSP22:FAM65B:IDO1:CD274:PDCD1LG2:ANXA1:KLF4
Cluster 5	GO_bp	GO_REGULATION_OF_HEMOPOIESIS	452	32	16.718	0.000357556	0.0171767	MTOR:ZNF683:JUN:FCGR2B:CD46:ZMIZ1:TESPA1:PSME1:PSME2:FOS:PSMB10:FANCA:PSMB3:PRKCA:TCF3:PGLYRP1:STAT1:JAG1:MYL9:CCR1:LEF1:KIAA0922:PIK3R1:MEF2C:PRELID1:IRF4:CD83:HIST1H3H:MAPK14:CA2:RIPK2:ANXA1
Cluster 5	GO_bp	GO_PROTEIN_LOCALIZATION_TO_PLASMA_MEMBRANE	248	21	9.17271	0.00037142	0.0176129	LDLRAP1:MACF1:GBP1:S100A10:KCNJ11:RILPL2:RAP2A:NUMB:TTC7B:ANXA2:RAB11A:EPB41L3:CDH2:TTC7A:VAMP5:LAMA5:ZDHHC23:RAPGEF2:FYB:PIK3R1:EZR
Cluster 5	GO_bp	GO_POSITIVE_REGULATION_OF_MOLECULAR_FUNCTION	1710	90	63.2473	0.000371428	0.0176129	MTOR:JUN:S100A10:EFNA1:AIM2:RABGAP1L:RGS2:ATP2B4:BAMBI:TRIM8:SLK:TCF7L2:TRIM21:KCNJ11:ABCC8:KCNC1:NR1H3:CASP1:CCND2:KRAS:MAPKAPK5:PTPN11:DOCK9:ANG:PSME1:PSME2:GPR65:RPS6KA5:TCL1B:TCL1A:ANXA2:TBC1D2B:NOD2:MT3:HERPUD1:MLKL:KARS:VPS9D1:SGSM2:ALOX12:SREBF1:RGS9:SPHK1:BCL2:TCF3:GADD45B:FCER2:ICAM1:MED25:MAPRE3:IL18R1:IL18RAP:ZEB2:NR4A2:DOCK10:CAB39:LRRFIP1:SRC:PLCG1:CTSA:MMP9:PARP9:ECT2:IL1RAP:TXK:PAR…
Cluster 5	GO_bp	GO_ALPHA_BETA_T_CELL_ACTIVATION	132	14	4.88225	0.000379088	0.0178609	TNFRSF14:MTOR:ZNF683:CD55:BCL11B:BCL2:IL18R1:LEF1:ITK:IRF4:CD83:RIPK2:CD274:ANXA1
Cluster 5	GO_bp	GO_T_HELPER_1_CELL_DIFFERENTIATION	18	5	0.665761	0.000388838	0.0182035	MTOR:IL18R1:LEF1:RIPK2:ANXA1
Cluster 5	GO_bp	GO_REGULATION_OF_TRANSMEMBRANE_TRANSPORT	534	36	19.7509	0.000399225	0.0185715	MTOR:CACNA1E:RGS2:ATP2B4:KCNJ11:ABCC8:KCNC1:AHNAK:HVCN1:PTPN11:VIMP:RGS9:KCNJ2:BCL2:YWHAQ:DYSF:CAB39:PLCG1:MMP9:OPRL1:KCNJ15:YWHAH:CACNA1I:KCNH8:TRPC1:CXCL9:CXCL10:PIK3R1:MEF2C:ADRB2:MAPK14:TSPAN13:GRB10:CALCR:CA2:SLC31A2
Cluster 5	GO_bp	GO_POSITIVE_REGULATION_OF_LIPID_METABOLIC_PROCESS	133	14	4.91924	0.000409619	0.0188169	MTOR:PTCHD2:LDLRAP1:PTGS2:LPGAT1:NR1H3:NOD2:SMPD3:SREBF1:SRC:ABCG1:BMP6:NSMAF:ANXA1
Cluster 5	GO_bp	GO_NEGATIVE_REGULATION_OF_IMMUNE_RESPONSE	133	14	4.91924	0.000409619	0.0188169	TNFRSF14:FCGR2B:C4BPA:CD55:NR1H3:SERPING1:TRAFD1:VIMP:NLRC5:PGLYRP1:PARP3:PARP14:DUSP22:ANXA1
Cluster 5	GO_bp	GO_AGING	304	24	11.244	0.000413514	0.0188778	MTOR:JUN:LMNA:PTGS2:ZMIZ1:SERPING1:UCP2:KRAS:ATP2B1:NUAK1:MAPKAPK5:FOS:ALOX12:SREBF1:RNF165:BCL2:ICAM1:IGFBP2:APOD:CTNNA1:MAPK14:POLB:PAX5:GSN
Cluster 5	GO_bp	GO_POSITIVE_REGULATION_OF_LIPID_BIOSYNTHETIC_PROCESS	75	10	2.774	0.000420437	0.0189445	MTOR:PTGS2:LPGAT1:NR1H3:SMPD3:SREBF1:ABCG1:BMP6:NSMAF:ANXA1
Cluster 5	GO_bp	GO_CYTOKINE_PRODUCTION_INVOLVED_IN_INFLAMMATORY_RESPONSE	38	7	1.4055	0.000422706	0.0189445	GBP5:CD6:NOD2:KARS:APOD:MAPK14:IDO1
Cluster 5	GO_bp	GO_NEGATIVE_REGULATION_OF_INSULIN_SECRETION	38	7	1.4055	0.000422706	0.0189445	KCNJ11:ABCC8:UCP2:PTPN11:SREBF1:NDUFAF2:NOV
Cluster 5	GO_bp	GO_POSITIVE_REGULATION_OF_PHOSPHORUS_METABOLIC_PROCESS	1042	60	38.5402	0.000432757	0.0192257	TNFRSF14:MTOR:JUN:EFNA1:FCGR2B:PTGS2:ATP2B4:SLK:CCND2:KRAS:ITGA5:MAPKAPK5:PTPN11:CDK2AP1:FGF9:WDFY2:RAP2A:ANG:RPS6KA5:TCL1B:TCL1A:ANXA2:NOD2:MT3:MLKL:KARS:AXIN2:PRKCA:SPHK1:CDH2:BCL2:GADD45B:ICAM1:MAPRE3:ZEB2:ACVR1:CAB39:SRC:MMP9:CCR1:PARP9:PARP14:ECT2:RELL1:BANK1:EGF:RAPGEF2:MEF2C:SH3RF2:ADRB2:FGFR4:DUSP22:BMP6:MAPK14:VEGFA:SASH1:CALCR:MDFIC:HIPK2:RIPK2
Cluster 5	GO_bp	GO_REGULATION_OF_CELLULAR_LOCALIZATION	869	52	32.1415	0.000434214	0.0192257	TARDBP:LDLRAP1:SH3GLB1:GBP1:LMNA:PTGS2:RASSF5:SUFU:TRIM8:TCF7L2:KCNJ11:EHD1:NUMA1:UCP2:PTPN11:NUMB:APBA2:ANXA2:RAB11A:BAIAP3:SREBF1:CDH2:BCL2:YWHAQ:RAB11FIP5:TM9SF4:TP53INP2:SRC:PLCG1:DNAJC5:YWHAH:PARP9:TRPC1:PLD1:ECT2:APOD:CXCL9:CXCL10:EGF:NDUFAF2:PIK3R1:MEF2C:MCTP1:FAM65B:MAPK14:UBE2J1:EZR:CALCR:MDFIC:INSIG1:LEPROTL1:GSN
Cluster 5	GO_bp	GO_INTERFERON_GAMMA_PRODUCTION	104	12	3.84662	0.000453595	0.0199636	IL12RB2:IRF8:PGLYRP1:IL18R1:IL18RAP:TNFRSF13C:TXK:ITK:BTN3A1:RIPK2:CD274:PDCD1LG2
Cluster 5	GO_bp	GO_MUSCLE_CELL_PROLIFERATION	183	17	6.76857	0.000458763	0.0200709	MTOR:LDLRAP1:JUN:PTGS2:TCF7L2:FGF9:ANG:RBPMS2:SMPD3:ALOX12:STAT1:MMP9:APOD:MEF2C:MAPK14:NOV:KLF4
Cluster 5	GO_bp	GO_POSITIVE_REGULATION_OF_CAMP_DEPENDENT_PROTEIN_KINASE_ACTIVITY	5	3	0.184934	0.000474508	0.0206369	ATP2B4:RAPGEF2:ADRB2
Cluster 5	GO_bp	GO_INTERLEUKIN_2_PRODUCTION	63	9	2.33016	0.0004827	0.0208697	GBP1:SFTPD:LAG3:IL1RAP:IRF4:CD83:EZR:RIPK2:ANXA1
Cluster 5	GO_bp	GO_RESPONSE_TO_ABIOTIC_STIMULUS	1180	66	43.6443	0.000494341	0.0209212	MTOR:JUN:ADAM15:LMNA:PTGS2:ATP2B4:DDIT4:PDLIM1:ABCC8:KCNC1:BEST1:PLEKHB1:UCP2:CASP1:KRAS:ATP2B1:HVCN1:PTPN11:ANG:PSME1:PSME2:FOS:GPR65:CRIP1:CRIP1:SLC12A6:MT3:PSMB10:KARS:PSMB3:KCNJ2:BCL2:ICAM1:JUND:FOSB:RHOB:DYSF:RAB11FIP5:NR4A2:DPP4:STAT1:IGFBP2:SERPINE2:CAB39:TM9SF4:SRC:BHLHE40:XPC:ECT2:CXCL10:NFKB1:ERCC8:PIK3R1:ADRB2:BMP6:MAPK14:VEGFA:SLC29A1:PTPRK:HIPK2:CNTNAP2:POLB:CA2:ANXA1:DFNB31:TSC22D3:…
Cluster 5	GO_bp	GO_NEGATIVE_REGULATION_OF_MUSCLE_ADAPTATION	11	4	0.406854	0.00049471	0.0209212	MTOR:LMNA:ATP2B4:KLF4
Cluster 5	GO_bp	GO_RESPONSE_TO_INTERLEUKIN_18	11	4	0.406854	0.00049471	0.0209212	IL18BP:IL18R1:IL18RAP:RIPK2
Cluster 5	GO_bp	GO_LEUKOCYTE_APOPTOTIC_PROCESS	105	12	3.88361	0.000495278	0.0209212	EFNA1:HCAR2:VIMP:NOD2:CLC:RAPGEF2:MEF2C:PRELID1:IDO1:CD274:ANXA1:TSC22D3
Cluster 5	GO_bp	GO_REGULATION_OF_CELL_DEATH	1611	85	59.5856	0.000505596	0.0211468	TNFRSF25:TARDBP:MTOR:JUN:SORT1:MCL1:EFNA1:LMNA:FCGR2B:PTGS2:RASSF5:OBSCN:AKR1C3:DDIT4:SLK:TCF7L2:HIPK3:UCP2:CASP1:CCND2:KRAS:ITGA5:HRK:HCAR2:FOS:TCL1A:BCL11B:VIMP:SOX8:NOD2:MT3:HERPUD1:ALOX12:AXIN2:PRKCA:SPHK1:BCL2:GADD45B:ICAM1:YWHAQ:RHOB:CYP1B1:ANXA4:MAL:NR4A2:ACVR1:SLC40A1:STAT1:ITM2C:SRC:PLCG1:MMP9:TNFRSF6B:DNAJC5:YWHAH:IL2RB:LGALS1:ECT2:CXCL10:NFKB1:LEF1:ANXA5:RAPGEF2:SLC25A4:PIK3R1:RASGRF2:…
Cluster 5	GO_bp	GO_RESPONSE_TO_INORGANIC_SUBSTANCE	541	36	20.0098	0.00050805	0.0211468	JUN:PTGS2:ATP2B4:AKR1C3:ABCC8:KCNC1:IL18BP:UCP2:HVCN1:FOS:FBLN5:CRIP1:CRIP1:SYT17:MT3:SMPD3:SPHK1:BCL2:ICAM1:FOSB:RHOB:CYP1B1:IL18RAP:SLC40A1:STAT1:IGFBP2:SRC:MMP9:TRPC1:ECT2:ANXA5:MEF2C:BMP6:CA2:ANXA1:KLF4:GSN
Cluster 5	GO_bp	GO_PROTEIN_LOCALIZATION_TO_MEMBRANE	602	39	22.266	0.000509249	0.0211468	LDLRAP1:MACF1:SH3GLB1:GBP1:S100A10:ARL3:RPS13:KCNJ11:TIMM10:VPS37C:RPL6:CLIP1:RILPL2:RAP2A:NUMB:TTC7B:ANXA2:RAB11A:ZDHHC1:EPB41L3:CDH2:BCL2:YWHAQ:TTC7A:VAMP5:MAL:CXXC11:TM9SF4:LAMA5:YWHAH:COLQ:ZDHHC23:WDR19:RAPGEF2:FYB:PIK3R1:EZR:AGK:GSN
Cluster 5	GO_bp	GO_POSITIVE_REGULATION_OF_CELL_DEATH	664	42	24.5592	0.000512449	0.0211601	MTOR:JUN:SORT1:MCL1:FCGR2B:PTGS2:OBSCN:AKR1C3:DDIT4:UCP2:CASP1:HRK:HCAR2:FOS:MT3:ALOX12:AXIN2:BCL2:GADD45B:YWHAQ:RHOB:CYP1B1:MAL:ITM2C:SRC:PLCG1:MMP9:YWHAH:ECT2:ANXA5:RAPGEF2:RASGRF2:MEF2C:CTNNA1:PRELID1:CALCR:IDO1:NSMAF:RIPK2:CD274:ANXA1:GSN
Cluster 5	GO_bp	GO_POSITIVE_REGULATION_OF_CELL_ACTIVATION	309	24	11.4289	0.00052279	0.0214665	TNFRSF14:CD55:CD46:ZMIZ1:CD6:TESPA1:PTPN11:NOD2:KARS:BCL2:DPP4:IGFBP2:SIRPG:SRC:LGALS1:TNFRSF13C:BTLA:PIK3R1:MEF2C:CD83:RIPK2:CD274:PDCD1LG2:ANXA1
Cluster 5	GO_bp	GO_ANATOMICAL_STRUCTURE_FORMATION_INVOLVED_IN_MORPHOGENESIS	1052	60	38.91	0.000550213	0.022467	JUN:HIPK1:ADAM15:EFNA1:THBS3:PTGS2:OBSCN:SUFU:PIK3C2A:ABCC8:EHD1:ITGA5:TCTN1:PTPN11:FGF9:ANG:WARS:SLC12A6:ANXA2:SOX8:SMPD3:PMP22:AXIN2:PRKCA:SPHK1:EPB41L3:RFX2:DYRK1B:FUZ:RHOB:CYP1B1:DYSF:ZEB2:ACVR1:SLC40A1:STAT1:JAG1:ISM1:PLCG1:MMP9:LAMA5:TNFRSF13C:BHLHE40:APOD:CXCL9:CXCL10:LEF1:EGF:MEF2C:FAM65B:MAPK14:VEGFA:SASH1:HIPK2:EPHA1:NOV:NFIB:ANXA1:KLF4:DFNB31
Cluster 5	GO_bp	GO_T_CELL_MEDIATED_IMMUNITY	92	11	3.40278	0.000571867	0.0232187	FCGR2B:CD55:CD46:ICAM1:CLC:CD8A:IL18R1:IL18RAP:JAG1:DUSP22:BTN3A3
Cluster 5	GO_bp	GO_ALCOHOL_METABOLIC_PROCESS	221	19	8.17407	0.000576256	0.0232187	PTCHD2:DHRS3:LDLRAP1:AKR1C3:ALDH2:SREBF1:GALK1:SPHK1:CYP1B1:DYSF:DHRS9:INPP1:PLCG1:ABCG1:APOL2:INPP4B:BMP6:EPHX2:SQLE
Cluster 5	GO_bp	GO_T_CELL_PROLIFERATION	170	16	6.28774	0.000578099	0.0232187	TNFRSF14:CD55:CD46:SFTPD:CD6:PSMB10:CLC:IGFBP2:TNFRSF13C:KIAA0922:BTN3A1:IDO1:RIPK2:CD274:PDCD1LG2:ANXA1
Cluster 5	GO_bp	GO_B_CELL_PROLIFERATION	93	11	3.43977	0.000627383	0.0250612	FCGR2B:CR2:MS4A1:TNFRSF13B:BCL2:CD22:CD79A:TNFRSF13C:LEF1:MEF2C:MZB1
Cluster 5	GO_bp	GO_CELLULAR_RESPONSE_TO_LIPID	589	38	21.7852	0.000646621	0.0255994	ADAM15:CD55:AKR1C3:VIM:DDIT4:NR1H3:CD6:CASP1:ATP2B1:CEBPE:VIMP:NOD2:IRF8:ALOX12:SREBF1:PRKCA:ICAM1:NR4A2:SRC:PMEPA1:YWHAH:GRAMD1C:PF4V1:CXCL9:CXCL10:NFKB1:LEF1:NR3C2:MEF2C:BMP6:MAPK14:SASH1:INSIG1:RIPK2:CD274:PDCD1LG2:ANXA1:KLF4
Cluster 5	GO_bp	GO_HOMEOSTASIS_OF_NUMBER_OF_CELLS	241	20	8.9138	0.000654934	0.0255994	KRAS:PTPN11:HCAR2:TNFRSF17:TNFRSF13B:CDH2:BCL2:SLC40A1:STAT1:DOCK10:TNFRSF13C:MEF2C:MAPK14:VEGFA:L3MBTL3:HIPK2:POLB:NOV:ANXA1:TSC22D3
Cluster 5	GO_bp	GO_MEMBRANE_RAFT_ORGANIZATION	20	5	0.739735	0.000661754	0.0255994	S100A10:ANXA2:MAL:PACSIN2:GSN
Cluster 5	GO_bp	GO_RESPONSE_TO_MURAMYL_DIPEPTIDE	20	5	0.739735	0.000661754	0.0255994	VIM:NOD2:JAG1:MAPK14:RIPK2
Cluster 5	GO_bp	GO_NEGATIVE_REGULATION_OF_T_CELL_RECEPTOR_SIGNALING_PATHWAY	20	5	0.739735	0.000661754	0.0255994	GBP1:DUSP3:UBASH3A:DUSP22:EZR
Cluster 5	GO_bp	GO_REGULATION_OF_MYOBLAST_FUSION	20	5	0.739735	0.000661754	0.0255994	EHD1:CXCL9:CXCL10:FAM65B:MAPK14
Cluster 5	GO_bp	GO_REGULATION_OF_MYOTUBE_DIFFERENTIATION	53	8	1.9603	0.00067789	0.02606	MTOR:EHD1:BCL2:CXCL9:CXCL10:FAM65B:MAPK14:NOV
Cluster 5	GO_bp	GO_T_HELPER_1_TYPE_IMMUNE_RESPONSE	41	7	1.51646	0.000684144	0.02606	MTOR:IL18BP:IL18R1:IL18RAP:LEF1:RIPK2:ANXA1
Cluster 5	GO_bp	GO_NEGATIVE_REGULATION_OF_HORMONE_SECRETION	66	9	2.44112	0.000684295	0.02606	KCNJ11:ABCC8:UCP2:PTPN11:SREBF1:RAB11FIP5:ANXA5:NDUFAF2:NOV
Cluster 5	GO_bp	GO_REGULATION_OF_LEUKOCYTE_DIFFERENTIATION	260	21	9.61655	0.000691433	0.026196	MTOR:ZNF683:JUN:FCGR2B:CD46:ZMIZ1:TESPA1:FOS:FANCA:PRKCA:PGLYRP1:CCR1:LEF1:KIAA0922:PIK3R1:PRELID1:IRF4:CD83:CA2:RIPK2:ANXA1
Cluster 5	GO_bp	GO_ENDOTHELIUM_DEVELOPMENT	109	12	4.03155	0.000695717	0.0262232	ANXA2:ALOX12:ICAM1:RHOB:ACVR1:SLC40A1:JAG1:LAMA5:CXCL10:RAPGEF2:BMP6:EZR
Cluster 5	GO_bp	GO_CELLULAR_RESPONSE_TO_OXIDATIVE_STRESS	279	22	10.3193	0.000719008	0.0268253	JUN:MCL1:AKR1C3:MSRB2:IL18BP:FOS:FBLN5:VIMP:MT3:SMPD3:SPHK1:BCL2:RHOB:CYP1B1:IL18RAP:NR4A2:SRC:MMP9:ECT2:PTPRK:ANXA1:KLF4
Cluster 5	GO_bp	GO_NEGATIVE_REGULATION_OF_HUMORAL_IMMUNE_RESPONSE	12	4	0.443841	0.000720449	0.0268253	FCGR2B:C4BPA:CD55:SERPING1
Cluster 5	GO_bp	GO_CELL_MORPHOGENESIS_INVOLVED_IN_NEURON_DIFFERENTIATION	572	37	21.1564	0.000722642	0.0268253	MACF1:EFNA1:NCAM1:TCTN1:PTPN11:SPG20:RAP2A:NUMB:RPS6KA5:BCL11B:RAB11A:MT3:PRKCA:BAIAP2:CDH2:RNF165:BCL2:ZEB2:NR4A2:DOCK10:SRC:PLCG1:YWHAH:TRAK1:RAPGEF2:ZSWIM6:PIK3R1:MEF2C:CYFIP2:VEGFA:EZR:TMEM106B:GRB10:EPHA1:DPYSL2:NFIB:DFNB31
Cluster 5	GO_bp	GO_POSITIVE_REGULATION_OF_BLOOD_VESSEL_ENDOTHELIAL_CELL_MIGRATION	54	8	1.99728	0.000770441	0.028456	PTGS2:PIK3C2A:ALOX12:STAT5A:PRKCA:PLCG1:VEGFA:ANXA1
Cluster 5	GO_bp	GO_CELL_MORPHOGENESIS_INVOLVED_IN_DIFFERENTIATION	720	44	26.6304	0.000774533	0.0284641	MACF1:GBP1:S100A10:EFNA1:LAMC1:NCAM1:TCTN1:PTPN11:RILPL2:SPG20:RAP2A:COCH:NUMB:RPS6KA5:BCL11B:RAB11A:MT3:PRKCA:BAIAP2:CDH2:RNF165:BCL2:ZEB2:NR4A2:DOCK10:SRC:PLCG1:LAMA5:YWHAH:TRAK1:LEF1:RAPGEF2:ZSWIM6:PIK3R1:MEF2C:CYFIP2:VEGFA:EZR:TMEM106B:GRB10:EPHA1:DPYSL2:NFIB:DFNB31
Cluster 5	GO_bp	GO_POSITIVE_REGULATION_OF_PROTEIN_METABOLIC_PROCESS	1567	82	57.9582	0.00081445	0.0296453	TNFRSF14:MTOR:JUN:EFNA1:LMNA:AIM2:FCGR2B:PTGS2:ATP2B4:RASSF5:VIM:SLK:TCF7L2:NR1H3:CASP1:CCND2:KRAS:ITGA5:MAPKAPK5:PTPN11:CDK2AP1:FGF9:WDFY2:RAP2A:ANG:PSME1:PSME2:RPS6KA5:TCL1B:TCL1A:ANXA2:NOD2:MT3:HERPUD1:MLKL:KARS:ALOX12:SREBF1:AXIN2:PRKCA:SPHK1:CDH2:BCL2:GADD45B:ICAM1:RNF144A:MAPRE3:ZEB2:ACVR1:CAB39:SRC:MMP9:TNFRSF13C:CCR1:PARP9:PARP14:ECT2:RELL1:BANK1:EGF:RAPGEF2:SH3RF2:ADRB2:CYFIP2:FGFR4:PREL…
Cluster 5	GO_bp	GO_LEUKOCYTE_MEDIATED_IMMUNITY	743	45	27.4811	0.00081474	0.0296453	MASP2:C1QB:CD58:FCGR2B:SH2D1B:C4BPA:CD55:CR2:CD46:SWAP70:SERPING1:LAG3:HVCN1:SLC15A4:ANXA2:CPPED1:NOD2:KPNB1:TMC6:FCER2:ICAM1:CD97:CLC:PGLYRP1:CD8A:IL18R1:IL18RAP:CAB39:JAG1:CTSA:MMP9:DNAJC5:DYNC1LI1:PARP3:PLD1:NFKB1:IQGAP2:RAB24:DUSP22:TXNDC5:BTN3A3:MAPK14:GSDMD:GSN:FRMPD3
Cluster 5	GO_bp	GO_POSITIVE_REGULATION_OF_MYOTUBE_DIFFERENTIATION	31	6	1.14659	0.000830152	0.0300572	MTOR:EHD1:BCL2:CXCL9:FAM65B:MAPK14
Cluster 5	GO_bp	GO_INFLAMMATORY_CELL_APOPTOTIC_PROCESS	21	5	0.776721	0.00084236	0.0303497	HCAR2:VIMP:NOD2:MEF2C:ANXA1
Cluster 5	GO_bp	GO_POSITIVE_REGULATION_OF_SMOOTH_MUSCLE_CELL_PROLIFERATION	82	10	3.03291	0.000861247	0.0308789	MTOR:LDLRAP1:JUN:PTGS2:FGF9:RBPMS2:SMPD3:ALOX12:STAT1:MMP9
Cluster 5	GO_bp	GO_REGULATION_OF_INTRACELLULAR_SIGNAL_TRANSDUCTION	1756	90	64.9487	0.000865953	0.0308969	MTOR:RCAN3:JUN:GBP1:HIPK1:MCL1:S100A4:EFNA1:FCGR2B:RALGPS2:PTGS2:RGS2:ATP2B4:OBSCN:AKR1C3:RASGEF1A:DDIT4:TRIM8:TCF7L2:HIPK3:CASP1:KRAS:NUAK1:MAPKAPK5:PTPN11:SETD8:FGF9:RAP2A:ARHGEF40:GPR65:VIMP:NOD2:MT3:HERPUD1:MLKL:KARS:DUSP3:PRKCA:SPHK1:CYTH1:SECTM1:RBBP8:CDH2:BCL2:GADD45B:ICAM1:CD22:RHOB:IL18R1:SLC20A1:ZEB2:STAT1:SERPINE2:SRC:MMP9:STMN3:OPRL1:DUSP18:APOL3:LGALS1:LMCD1:CCR1:SHISA5:ECT2:RELL1:BA…
Cluster 5	GO_bp	GO_PLATELET_DERIVED_GROWTH_FACTOR_RECEPTOR_SIGNALING_PATHWAY	55	8	2.03427	0.000872883	0.0309937	PIK3C2A:PTPN11:SMPD3:SRC:TIPARP:APOD:VEGFA:PTPN12
Cluster 5	GO_bp	GO_AMEBOIDAL_TYPE_CELL_MIGRATION	378	27	13.981	0.000879563	0.0310807	MTOR:MACF1:JUN:EFNA1:PTGS2:PIK3C2A:PTPN11:RAB11A:SOX8:ALOX12:STAT5A:PRKCA:RHOB:CYP1B1:ZEB2:ACVR1:DPP4:SRC:PLCG1:MMP9:LAMA5:MEF2C:VEGFA:SASH1:NOV:ANXA1:KLF4
Cluster 5	GO_bp	GO_MYOTUBE_DIFFERENTIATION	97	11	3.58771	0.00089634	0.031522	MTOR:SORT1:EHD1:BCL2:DYRK1B:CXCL9:CXCL10:MEF2C:FAM65B:MAPK14:NOV
Cluster 5	GO_bp	GO_P38MAPK_CASCADE	43	7	1.59043	0.000919954	0.0321495	KARS:GADD45B:RELL1:MAPK14:VEGFA:SASH1:EZR
Cluster 5	GO_bp	GO_POSITIVE_REGULATION_OF_RESPONSE_TO_INTERFERON_GAMMA	6	3	0.22192	0.000922931	0.0321495	NLRC5:PARP9:TXK
Cluster 5	GO_bp	GO_CELLULAR_RESPONSE_TO_TOXIC_SUBSTANCE	230	19	8.50695	0.000933828	0.0323756	UBIAD1:PTGS2:KCNJ11:IL18BP:FBLN5:VIMP:MT3:SMPD3:SPHK1:RHOB:CYP1B1:IL18RAP:SRC:XRN1:ECT2:NFKB1:IPCEF1:ANXA1:KLF4
Cluster 5	GO_bp	GO_REGULATION_OF_WNT_SIGNALING_PATHWAY	342	25	12.6495	0.000972201	0.0335478	MACF1:BAMBI:FRAT1:TCF7L2:FAM53B:FGF9:PSME1:PSME2:PSMB10:PSMB3:AXIN2:APCDD1:CDH2:FUZ:ZEB2:IGFBP2:SRC:SULF2:NFKB1:LEF1:EGF:KIAA0922:MAPK14:GRB10:MDFIC
Cluster 5	GO_bp	GO_RESPONSE_TO_TOXIC_SUBSTANCE	500	33	18.4934	0.000983382	0.033694	UBIAD1:JUN:AQP10:PTGS2:RGS2:KCNJ11:KCNC1:IL18BP:FOS:FBLN5:VIMP:MT3:SMPD3:RGS9:SPHK1:BCL2:ICAM1:RHOB:CYP1B1:IL18RAP:NR4A2:STAT1:SRC:RGS19:XRN1:ECT2:NFKB1:IPCEF1:EPHX2:POLB:ANXA1:KLF4:GSN
Cluster 5	GO_bp	GO_REGULATION_OF_VASCULAR_ENDOTHELIAL_GROWTH_FACTOR_RECEPTOR_SIGNALING_PATHWAY	32	6	1.18358	0.000990192	0.033694	ITGA5:FGF9:TMEM204:MT3:VEGFA:GRB10
Cluster 5	GO_bp	GO_MYELOID_CELL_APOPTOTIC_PROCESS	32	6	1.18358	0.000990192	0.033694	HCAR2:VIMP:NOD2:BCL2:MEF2C:ANXA1
Cluster 5	GO_bp	GO_REGULATION_OF_LIPID_BIOSYNTHETIC_PROCESS	179	16	6.62062	0.00100981	0.0337556	MTOR:PTGS2:LPGAT1:AKR1C3:NR1H3:SMPD3:SREBF1:KPNB1:ABCG1:NFKB1:FGFR4:BMP6:INSIG1:NSMAF:SQLE:ANXA1
Cluster 5	GO_bp	GO_POSITIVE_REGULATION_OF_VASCULATURE_DEVELOPMENT	179	16	6.62062	0.00100981	0.0337556	HIPK1:PTGS2:PIK3C2A:ITGA5:PRKCA:SPHK1:RHOB:CYP1B1:PLCG1:RAPGEF2:VEGFA:SASH1:HIPK2:EPHA1:ANXA1:KLF4
Cluster 5	GO_bp	GO_REGULATION_OF_LOW_DENSITY_LIPOPROTEIN_PARTICLE_CLEARANCE	13	4	0.480827	0.00101037	0.0337556	LDLRAP1:ABCC8:ANXA2:MYLIP
Cluster 5	GO_bp	GO_V_D_J_RECOMBINATION	13	4	0.480827	0.00101037	0.0337556	BCL11B:TCF3:LEF1:POLB
Cluster 5	GO_bp	GO_CELL_MATRIX_ADHESION	214	18	7.91516	0.00102435	0.0340676	MACF1:S100A10:ADAM15:THBS3:SLK:FBLN5:DUSP3:BCL2:JAG1:SRC:LAMA5:APOD:PIK3R1:DUSP22:VEGFA:PTPRK:SGCE:EPHA1
Cluster 5	GO_bp	GO_POSITIVE_REGULATION_OF_MUSCLE_CELL_DIFFERENTIATION	84	10	3.10689	0.00104068	0.0344548	MTOR:EHD1:CDH2:BCL2:TCF3:CXCL9:MEF2C:CTNNA1:FAM65B:MAPK14
Cluster 5	GO_bp	GO_MUSCLE_STRUCTURE_DEVELOPMENT	605	38	22.377	0.00105989	0.0349337	MTOR:SORT1:LMNA:RGS2:OBSCN:TCF7L2:EHD1:KRAS:FGF9:FOS:RBPMS2:SOX8:TMEM204:ZFHX3:CDH2:RNF165:BCL2:TCF3:DYRK1B:DYSF:VAMP5:ACVR1:JAG1:LAMA5:LGALS1:SFMBT1:CXCL9:CXCL10:LEF1:MEF2C:CTNNA1:FAM65B:MAPK14:VEGFA:COL19A1:SGCE:NOV:PAX5
Cluster 5	GO_bp	GO_REGULATION_OF_DNA_BINDING_TRANSCRIPTION_FACTOR_ACTIVITY	403	28	14.9057	0.00108553	0.0355375	JUN:AIM2:SUFU:TRIM8:TCF7L2:TRIM21:KRAS:FOS:RPS6KA5:NOD2:NLRC5:FANCA:SPHK1:TCF3:ICAM1:CYP1B1:ANXA4:IL18R1:IL18RAP:LRRFIP1:BHLHE40:IL1RAP:NFKB1:MAPK14:VEGFA:HIPK2:RIPK2:KLF4
Cluster 5	GO_bp	GO_POSITIVE_REGULATION_OF_INTRACELLULAR_SIGNAL_TRANSDUCTION	971	55	35.9141	0.00108896	0.0355375	MTOR:JUN:MCL1:S100A4:EFNA1:FCGR2B:AKR1C3:RASGEF1A:TRIM8:TCF7L2:CASP1:KRAS:MAPKAPK5:PTPN11:FGF9:GPR65:NOD2:MT3:MLKL:KARS:PRKCA:SPHK1:SECTM1:CDH2:BCL2:GADD45B:ICAM1:IL18R1:SLC20A1:ZEB2:SRC:APOL3:LGALS1:LMCD1:CCR1:SHISA5:ECT2:RELL1:BANK1:EGF:ALPK1:RAPGEF2:PIK3R1:SH3RF2:ADRB2:FGFR4:DUSP22:MAPK14:VEGFA:SASH1:CALCR:MDFIC:HIPK2:SGK223:RIPK2
Cluster 5	GO_bp	GO_RESPONSE_TO_GROWTH_FACTOR	690	42	25.5208	0.00109272	0.0355375	JUN:SORT1:BAMBI:DDIT4:KCNC1:EHD1:NUMA1:ITGA5:PTPN11:FGF9:SPG20:FOS:RBPMS2:TMEM204:MT3:SMPD3:ZFHX3:DUSP3:TGIF1:RNF165:FUZ:ACVR1:SRC:PLCG1:SULF2:PMEPA1:VEPH1:LEF1:RAPGEF2:MEF2C:CYFIP2:FGFR4:DUSP22:BMP6:MAPK14:VEGFA:PTPRK:GRB10:PTPN12:HIPK2:ANXA1:KLF4
Cluster 5	GO_bp	GO_REGULATION_OF_PROTEIN_IMPORT	57	8	2.10824	0.00111047	0.0359557	TARDBP:PTGS2:SUFU:ECT2:APOD:PIK3R1:MAPK14:MDFIC
Cluster 5	GO_bp	GO_RESPONSE_TO_HYDROGEN_PEROXIDE	131	13	4.84526	0.00113303	0.0365252	JUN:IL18BP:SMPD3:SPHK1:BCL2:RHOB:CYP1B1:IL18RAP:STAT1:SRC:ECT2:ANXA1:KLF4
Cluster 5	GO_bp	GO_ALPHA_BETA_T_CELL_DIFFERENTIATION	100	11	3.69867	0.0011554	0.0370838	MTOR:ZNF683:BCL11B:BCL2:IL18R1:LEF1:ITK:IRF4:CD83:RIPK2:ANXA1
Cluster 5	GO_bp	GO_RESPONSE_TO_FLUID_SHEAR_STRESS	33	6	1.22056	0.00117291	0.037406	PTGS2:SRC:MEF2C:CA2:MTSS1:KLF4
Cluster 5	GO_bp	GO_REGULATION_OF_METAL_ION_TRANSPORT	366	26	13.5371	0.00117562	0.037406	PTGS2:ATP2B4:ABCC8:KCNC1:BEST1:AHNAK:ANXA2:RGS9:KCNJ2:BCL2:ICAM1:DYSF:SERPINE2:CAB39:PLCG1:OPRL1:YWHAH:CCR1:TRPC1:CXCL9:CXCL10:EGF:ADRB2:TSPAN13:CALCR:SLC31A2
Cluster 5	GO_bp	GO_NEGATIVE_REGULATION_OF_SECRETION	217	18	8.02612	0.00120066	0.0379068	GBP1:FCGR2B:KCNJ11:ABCC8:NR1H3:UCP2:PTPN11:SREBF1:CD22:ANXA4:RAB11FIP5:BANK1:EGF:ANXA5:NDUFAF2:EZR:NOV:ANXA1
Cluster 5	GO_bp	GO_REGULATION_OF_VASCULATURE_DEVELOPMENT	309	23	11.4289	0.00120167	0.0379068	HIPK1:EFNA1:PTGS2:PIK3C2A:ABCC8:ITGA5:FGF9:WARS:PRKCA:SPHK1:RHOB:CYP1B1:STAT1:ISM1:PLCG1:CXCL10:RAPGEF2:VEGFA:SASH1:HIPK2:EPHA1:ANXA1:KLF4
Cluster 5	GO_bp	GO_PEPTIDYL_THREONINE_MODIFICATION	116	12	4.29046	0.00120894	0.037973	MTOR:DDIT4:HIPK3:PRKCA:SPHK1:BCL2:ACVR1:CAB39:EGF:LMTK2:HIPK2:RIPK2
Cluster 5	GO_bp	GO_LEUKOCYTE_HOMEOSTASIS	86	10	3.18086	0.00124958	0.0388455	HCAR2:TNFRSF17:TNFRSF13B:BCL2:SLC40A1:DOCK10:TNFRSF13C:MEF2C:ANXA1:TSC22D3
Cluster 5	GO_bp	GO_CELL_SUBSTRATE_ADHESION	329	24	12.1686	0.00125164	0.0388455	MACF1:GBP1:S100A10:ADAM15:EFNA1:THBS3:LAMC1:SLK:VWF:ITGA5:FBLN5:DUSP3:BCL2:JAG1:SRC:LAMA5:LGALS1:APOD:PIK3R1:DUSP22:VEGFA:PTPRK:SGCE:EPHA1
Cluster 5	GO_bp	GO_RESPONSE_TO_PEPTIDE	487	32	18.0125	0.00125257	0.0388455	MTOR:SORT1:FCGR2B:PTGS2:VIM:PIK3C2A:ABCC8:UCP2:PTPN11:VIMP:NOD2:SMPD3:SREBF1:STAT5A:BAIAP2:ICAM1:NR4A2:STAT1:JAG1:SRC:NFKB1:ANXA5:PIK3R1:MZB1:ADRB2:MAPK14:GRB10:CALCR:CA2:RIPK2:ANXA1:KLF4
Cluster 5	GO_bp	GO_REGULATION_OF_NEURON_DIFFERENTIATION	633	39	23.4126	0.00130506	0.0402956	MTOR:PTCHD2:MACF1:EFNA1:RGS2:VIM:SPG20:RAP2A:BCL11B:RAB11A:SOX8:SYT17:MT3:ZFHX3:SCARF1:PMP22:CDH2:TCF4:BCL2:TCF3:BCL11A:ZEB2:ITM2C:JAG1:YWHAH:LGALS1:TRAK1:ECT2:RAPGEF2:ZSWIM6:MEF2C:BMP6:MYLIP:VEGFA:TMEM106B:SGK223:DPYSL2:ZHX2:KLF4
Cluster 5	GO_bp	GO_RESPONSE_TO_AUDITORY_STIMULUS	23	5	0.850695	0.00131029	0.0402956	KCNC1:XPC:CXCL10:ERCC8:CNTNAP2
Cluster 5	GO_bp	GO_SMALL_GTPASE_MEDIATED_SIGNAL_TRANSDUCTION	550	35	20.3427	0.00131846	0.0403777	JUN:RALGPS2:OBSCN:RASGEF1A:ARL3:KRAS:BRAP:MAPKAPK5:RAP2A:DOCK9:RAB20:ARHGEF40:GPR65:RAB11A:KPNB1:CYTH1:RHOB:NCKAP1:DOCK10:SRC:STMN3:RGS19:RGL4:RAB6B:PLD1:ECT2:RAPGEF2:RASGRF2:RHOBTB3:RAB24:FAM65B:MAPK14:TAGAP:SGK223:RALGDS
Cluster 5	GO_bp	GO_POSITIVE_REGULATION_OF_PROTEIN_COMPLEX_ASSEMBLY	237	19	8.76586	0.00133017	0.0405674	MTOR:SH3GLB1:GBP5:AIM2:NUMA1:HRK:CLIP1:TCL1A:WARS:TPPP3:BAIAP2:ICAM1:MED25:NCKAP1:SRC:IGJ:IQGAP2:VEGFA:GSN
Cluster 5	GO_bp	GO_PRODUCTION_OF_MOLECULAR_MEDIATOR_OF_IMMUNE_RESPONSE	184	16	6.80556	0.00135048	0.0410167	TNFRSF14:FCGR2B:CD55:SWAP70:NOD2:KARS:TCF3:CD22:CLC:IL18R1:IL18RAP:VPREB3:PARP3:MZB1:MAPK14:POLB
Cluster 5	GO_bp	GO_POSITIVE_REGULATION_OF_WNT_SIGNALING_PATHWAY	167	15	6.17678	0.00136508	0.041153	MACF1:BAMBI:FRAT1:FAM53B:FGF9:PSME1:PSME2:PSMB10:PSMB3:AXIN2:ZEB2:SRC:SULF2:NFKB1:EGF
Cluster 5	GO_bp	GO_CELLULAR_RESPONSE_TO_HYDROGEN_PEROXIDE	87	10	3.21785	0.00136617	0.041153	IL18BP:SMPD3:SPHK1:RHOB:CYP1B1:IL18RAP:SRC:ECT2:ANXA1:KLF4
Cluster 5	GO_bp	GO_POSITIVE_REGULATION_OF_CYTOKINE_PRODUCTION_INVOLVED_IN_INFLAMMATORY_RESPONSE	14	4	0.517814	0.00137342	0.0412027	GBP5:CD6:NOD2:KARS
Cluster 5	GO_bp	GO_REGULATION_OF_ION_TRANSPORT	658	40	24.3373	0.00145736	0.043543	MTOR:CACNA1E:PTGS2:RGS2:ATP2B4:KCNJ11:ABCC8:KCNC1:BEST1:AHNAK:HVCN1:ANXA2:SYT17:RGS9:KCNJ2:BCL2:ICAM1:YWHAQ:DYSF:SERPINE2:CAB39:PLCG1:MMP9:OPRL1:KCNJ15:YWHAH:CACNA1I:KCNH8:CCR1:TRPC1:CXCL9:CXCL10:EGF:MEF2C:ADRB2:PRELID1:TSPAN13:CALCR:CA2:SLC31A2
Cluster 5	GO_bp	GO_CELLULAR_RESPONSE_TO_ANTIBIOTIC	135	13	4.99321	0.00149296	0.0444261	IL18BP:CRIP1:CRIP1:SMPD3:SPHK1:RHOB:CYP1B1:IL18RAP:SRC:XRN1:ECT2:MEF2C:ANXA1:KLF4
Cluster 5	GO_bp	GO_MUSCLE_CELL_DIFFERENTIATION	334	24	12.3536	0.00153346	0.0454472	MTOR:SORT1:LMNA:RGS2:OBSCN:EHD1:KRAS:FGF9:RBPMS2:TMEM204:CDH2:BCL2:TCF3:DYRK1B:DYSF:ACVR1:CXCL9:CXCL10:MEF2C:CTNNA1:FAM65B:MAPK14:VEGFA:NOV
Cluster 5	GO_bp	GO_INSULIN_SECRETION	204	17	7.54529	0.00154409	0.0455785	TARDBP:CACNA1E:TCF7L2:KCNJ11:ABCC8:UCP2:PTPN11:BAIAP3:SREBF1:PRKCA:RAB11FIP5:DPP4:SLC25A4:NDUFAF2:BLK:NOV:ANXA1
Cluster 5	GO_bp	GO_NEGATIVE_REGULATION_OF_CELL_SUBSTRATE_ADHESION	60	8	2.2192	0.00156076	0.0458863	GBP1:ADAM15:JAG1:SRC:LGALS1:APOD:PIK3R1:DUSP22
Cluster 5	GO_bp	GO_POST_EMBRYONIC_CAMERA_TYPE_EYE_DEVELOPMENT	7	3	0.258907	0.00157082	0.0459981	BCL11B:VEGFA:KLF4
Cluster 5	GO_bp	GO_POSITIVE_REGULATION_OF_EPITHELIAL_TO_MESENCHYMAL_TRANSITION	47	7	1.73838	0.0015806	0.0461009	MTOR:BAMBI:TCF7L2:AXIN2:ACVR1:JAG1:LEF1
Cluster 5	GO_bp	GO_POSITIVE_REGULATION_OF_CANONICAL_WNT_SIGNALING_PATHWAY	136	13	5.0302	0.00159641	0.046378	BAMBI:FRAT1:FAM53B:FGF9:PSME1:PSME2:PSMB10:PSMB3:AXIN2:SRC:SULF2:NFKB1:EGF
Cluster 5	GO_bp	GO_MICROVILLUS_ORGANIZATION	24	5	0.887682	0.00160534	0.0464537	PTPN11:RAP2A:PLD1:RAPGEF2:EZR
Cluster 5	GO_bp	GO_MYOBLAST_FUSION	35	6	1.29454	0.00161465	0.0465399	EHD1:DYRK1B:CXCL9:CXCL10:FAM65B:MAPK14
Cluster 5	GO_bp	GO_APOPTOTIC_SIGNALING_PATHWAY	579	36	21.4153	0.00168934	0.0485024	TNFRSF25:JUN:SORT1:HIPK1:MCL1:LMNA:PTGS2:DDIT4:TCF7L2:LGALS12:CASP1:HRK:GZMH:CRIP1:CRIP1:VIMP:HERPUD1:PRKCA:BCL2:ICAM1:YWHAQ:CYP1B1:MAL:NR4A2:ACVR1:ITM2C:SRC:MMP9:YWHAH:SHISA5:PIK3R1:CTNNA1:PRELID1:HIPK2:POLB:GRINA:GSN
Cluster 5	GO_bp	GO_POSITIVE_REGULATION_OF_MAPK_CASCADE	517	33	19.1221	0.00170347	0.048718	JUN:EFNA1:FCGR2B:KRAS:MAPKAPK5:PTPN11:FGF9:NOD2:MT3:MLKL:KARS:PRKCA:CDH2:GADD45B:ICAM1:ZEB2:SRC:CCR1:RELL1:BANK1:EGF:RAPGEF2:SH3RF2:ADRB2:FGFR4:DUSP22:MAPK14:VEGFA:SASH1:CALCR:MDFIC:HIPK2:RIPK2
Cluster 5	GO_bp	GO_RESPONSE_TO_ENDOGENOUS_STIMULUS	1586	81	58.661	0.0017478	0.0497919	MTOR:JUN:SORT1:FCGR2B:PTGS2:ATP2B4:AKR1C3:VIM:BAMBI:DDIT4:PIK3C2A:KCNJ11:ABCC8:KCNC1:NR1H3:EHD1:NUMA1:UCP2:KRAS:ATP2B1:PTPN11:FGF9:SPG20:ANG:FOS:ANXA2:RBPMS2:VIMP:NOD2:MT3:SMPD3:ZFHX3:SREBF1:STAT5A:DUSP3:RGS9:BAIAP2:RBBP8:RNF165:BCL2:ICAM1:JUND:FOSB:FUZ:BCL11A:NR4A2:ACVR1:STAT1:IGFBP2:SRC:PLCG1:SULF2:PMEPA1:OPRL1:ABCG1:YWHAH:XRN1:VEPH1:NFKB1:LEF1:ANXA5:NR3C2:RAPGEF2:PIK3R1:MEF2C:CTNNA1:MZB1:ADRB2…
Cluster 5	GO_cc	GO_EXTERNAL_SIDE_OF_PLASMA_MEMBRANE	294	31	10.8741	1.64513e-07	0.000164677	TNFRSF14:IL12RB2:FCGR2B:MS4A1:CD6:NCAM1:CXCR5:LAG3:CD69:ITGA5:CD79B:FCER2:ICAM1:CD79A:CD8A:SERPINE2:ABCG1:IL2RB:TNFRSF13C:CCR1:CXCL9:CXCL10:ANTXR2:ANXA5:CD83:BTN3A1:BTN3A3:CD274:PDCD1LG2:IL11RA:ANXA1
Cluster 5	GO_cc	GO_SIDE_OF_MEMBRANE	470	41	17.3838	3.42101e-07	0.000171222	TNFRSF14:LDLRAP1:IL12RB2:FCGR2B:RGS2:MS4A1:CD6:NCAM1:CXCR5:LAG3:CD69:KRAS:ITGA5:ATP2B1:CD79B:CYTH1:FCER2:ICAM1:CD79A:CD8A:PTPN4:SERPINE2:SRC:CTSA:ABCG1:IL2RB:TNFRSF13C:CCR1:CXCL9:CXCL10:ANTXR2:ANXA5:CD83:BTN3A1:BTN3A3:EZR:BLK:CD274:PDCD1LG2:IL11RA:ANXA1
Cluster 5	GO_cc	GO_CELL_SURFACE	771	54	28.5168	5.12831e-06	0.00171115	TNFRSF14:IL12RB2:SORT1:CD58:ADAM15:FCRL5:FCGR2B:CD55:CD46:IL15RA:KCNC1:MS4A1:CD6:NCAM1:CXCR5:LAG3:CD69:ITGA5:ANXA2:NOD2:CD79B:CDH2:FCER2:ICAM1:CD22:CD79A:ANXA4:VAMP5:CD8A:DPP4:SERPINE2:CXXC11:SULF2:ABCG1:IL2RB:LGALS1:TNFRSF13C:CCR1:CXCL9:CXCL10:ANTXR2:ANXA5:IQGAP2:CD83:BTN3A1:BTN3A3:VEGFA:NT5E:PTPRK:CNTNAP2:CD274:PDCD1LG2:IL11RA:ANXA1
Cluster 5	GO_cc	GO_EARLY_ENDOSOME	334	30	12.3536	7.2507e-06	0.00181449	LDLRAP1:MCOLN3:SORT1:FCGR1B:FCGR1A:RABGAP1L:EHD1:VPS29:FAM109A:WDFY2:RAB20:NUMB:ANXA2:CD22:RHOB:DYSF:RAB11FIP5:WDFY1:TM9SF4:PMEPA1:PACSIN2:TRAK1:PARM1:SNX2:ADRB2:SAMD9L:LMTK2:CNTNAP2:CD274:ANXA1
Cluster 5	GO_cc	GO_CELL_LEADING_EDGE	393	33	14.5358	1.0664e-05	0.00213494	MACF1:VIM:SLK:SWAP70:KCNJ11:KCNC1:GABARAPL1:ITGA5:ATP2B1:CLIP1:SYNE2:ANXA2:BAIAP2:EPB41L3:CDH2:DYSF:DPP4:NCKAP1:SRC:PLCG1:PACSIN2:LDB2:IQGAP2:SNX2:CTNNA1:DUSP22:FAM65B:PTPRK:EZR:SGCE:CNTNAP2:MTSS1:GSN
Cluster 5	GO_cc	GO_ENDOSOME	858	56	31.7346	2.64187e-05	0.00440752	LDLRAP1:MCOLN3:SORT1:FCGR1B:FCGR1A:RABGAP1L:IL15RA:SFTPD:KCNJ11:VPS37C:EHD1:TUBA1A:VPS29:FAM109A:CLIP1:WDFY2:RAP2A:RAB20:NUMB:ANXA2:RAB11A:BAIAP3:WIPI1:CD22:CD79A:RNF144A:RHOB:DYSF:RAB11FIP5:VAMP5:WDFY1:TM9SF4:SRC:PMEPA1:ABCG1:IL2RB:PACSIN2:TRAK1:PLD1:PARM1:ANTXR2:RAPGEF2:MCTP1:SNX2:ADRB2:FGFR4:RAB24:EZR:TMEM106B:SAMD9L:LMTK2:CNTNAP2:LEPROTL1:CD274:ANXA1:SLC31A2
Cluster 5	GO_cc	GO_WHOLE_MEMBRANE	1610	89	59.5486	7.59065e-05	0.0108546	MTOR:EFHD2:LDLRAP1:MCOLN3:SH3GLB1:SORT1:CD58:FCGR1B:FCGR1A:MCL1:S100A10:MTX1:PTGS2:ATP2B4:CD55:CD46:C10orf32:NUCB2:ABCC8:VPS37C:AHNAK:EHD1:GABARAPL1:LDHB:KRAS:FAR2:TUBA1A:ATP2B1:VPS29:HVCN1:MLXIP:ABCB9:SLC15A4:SPG20:RAP2A:RAB20:SLC22A17:SYNE2:RMDN3:ANXA2:RAB11A:BAIAP3:MT3:SCARF1:SREBF1:CYB561:WIPI1:TMC6:CDH2:BCL2:ICAM1:CD97:CD79A:RNF144A:RHOB:OTOF:DYSF:RAB11FIP5:CD8A:MAL:DPP4:ITM2C:SRC:CTSA:PMEPA…
Cluster 5	GO_cc	GO_LEADING_EDGE_MEMBRANE	169	17	6.25076	0.000179002	0.0208864	MACF1:KCNJ11:KCNC1:GABARAPL1:ITGA5:ATP2B1:SYNE2:EPB41L3:DPP4:NCKAP1:SRC:PACSIN2:FAM65B:PTPRK:EZR:SGCE:CNTNAP2
Cluster 5	GO_cc	GO_COLLAGEN_CONTAINING_EXTRACELLULAR_MATRIX	398	30	14.7207	0.000187789	0.0208864	C1QB:S100A10:S100A4:THBS3:LAMC1:SERPING1:LTBP3:NCAM1:VWF:FGF9:ANG:COCH:FBLN5:ANXA2:LGALS3BP:CDH2:ICAM1:CLC:ANXA4:SERPINE2:MMP9:LAMA5:LGALS1:COLQ:ANXA5:VCAN:F12:COL19A1:NOV:ANXA1
Cluster 5	GO_cc	GO_TRANSCRIPTION_FACTOR_AP_1_COMPLEX	5	3	0.184934	0.000474508	0.0472846	JUN:FOS:JUND
Cluster 5	GO_cc	GO_MYELIN_SHEATH	51	8	1.88632	0.000519611	0.0472846	TSPAN2:KCNJ11:TUBA1A:ANXA2:PMP22:BCL2:CA2:GSN
Cluster 5	GO_mf	GO_CELL_ADHESION_MOLECULE_BINDING	482	40	17.8276	1.68565e-06	0.00158513	EFHD2:MACF1:SH3GLB1:ADAM15:TAGLN2:CD46:PFKP:PDLIM1:SLK:SWAP70:AHNAK:EHD1:AMICA1:VWF:ITGA5:RPL6:PTPN11:DOCK9:NUMB:FBLN5:ANXA2:ICAM2:PRKCA:BAIAP2:CDH2:FCER2:ICAM1:COBLL1:STAT1:LRRFIP1:SRC:LAMA5:PACSIN2:SNX2:CTNNA1:HIST1H3H:EZR:CALD1:NOV:ANXA1
Cluster 5	GO_mf	GO_IDENTICAL_PROTEIN_BINDING	1679	99	62.1007	1.92721e-06	0.00158513	TARDBP:SRM:MTOR:C1QB:JUN:HOOK1:SH3GLB1:GBP1:GBP2:GBP5:DPYD:MCL1:S100A10:S100A4:AIM2:PTGS2:CR2:VIM:PRTFDC1:SFTPD:TRIM8:SLK:TRIM21:ACCS:TIMM10:CD6:BEST1:EHD1:CASP1:AMICA1:VWF:CD69:LDHB:HVCN1:FAM109A:BRAP:SDSL:CLIP1:ABCB9:RILPL2:ANG:CEBPE:PSME2:DAAM1:FBLN5:TCL1A:WARS:ANXA2:RBPMS2:KARS:HEXIM2:CD79B:KCNJ2:BAIAP2:APCDD1:RBBP8:CDH2:TCF4:BCL2:TCF3:KCTD15:CLC:CD79A:RABAC1:YWHAQ:RRM2:MAPRE3:ANXA4:NR4A2:ACV…
Cluster 5	GO_mf	GO_PROTEIN_HOMODIMERIZATION_ACTIVITY	838	57	30.9949	6.73406e-06	0.00369251	SRM:C1QB:JUN:SH3GLB1:GBP1:GBP2:GBP5:DPYD:MCL1:S100A10:PTGS2:CR2:PRTFDC1:TRIM8:SLK:ACCS:TIMM10:AMICA1:VWF:CD69:FAM109A:CLIP1:ABCB9:ANG:CEBPE:FBLN5:WARS:RBPMS2:KARS:CD79B:CDH2:TCF4:BCL2:TCF3:CD79A:RRM2:NR4A2:ACVR1:DPP4:STAT1:LRRFIP1:ABCG1:MORC2:LGALS1:BHLHE40:ECT2:IGJ:NFKB1:SNX2:ADRB2:GRPEL2:VEGFA:EPHX2:RIPK2:ZHX2:ANXA1:DFNB31
Cluster 5	GO_mf	GO_IMMUNOGLOBULIN_BINDING	22	7	0.813708	9.55449e-06	0.00392928	FCGR1B:FCGR1A:FCGR2B:VWF:FCER2:CD22:IGJ
Cluster 5	GO_mf	GO_GAMMA_CATENIN_BINDING	11	5	0.406854	2.60107e-05	0.00719774	TCF7L2:CDH2:LEF1:CTNNA1:PTPRK
Cluster 5	GO_mf	GO_CADHERIN_BINDING	322	28	11.9097	2.62532e-05	0.00719774	EFHD2:MACF1:SH3GLB1:TAGLN2:CD46:PFKP:PDLIM1:SLK:SWAP70:AHNAK:EHD1:RPL6:DOCK9:NUMB:ANXA2:BAIAP2:CDH2:COBLL1:STAT1:LRRFIP1:SRC:PACSIN2:SNX2:CTNNA1:HIST1H3H:EZR:CALD1:ANXA1
Cluster 5	GO_mf	GO_NON_MEMBRANE_SPANNING_PROTEIN_TYROSINE_PHOSPHATASE_ACTIVITY	8	4	0.295894	0.000114697	0.0269538	PTPN11:PTPN4:DUSP22:PTPN12
Cluster 5	GO_mf	GO_PROTEIN_DIMERIZATION_ACTIVITY	1303	73	48.1937	0.000236191	0.0485667	SRM:C1QB:JUN:SH3GLB1:GBP1:GBP2:GBP5:DPYD:MCL1:S100A10:PTGS2:CR2:PRTFDC1:TRIM8:SLK:ACCS:TIMM10:POLA2:AMICA1:VWF:CD69:FAM109A:MLXIP:CLIP1:ABCB9:RILPL2:ANG:CEBPE:FOS:FBLN5:WARS:RBPMS2:SOX8:KARS:SREBF1:CD79B:CDH2:TCF4:BCL2:TCF3:CD79A:RRM2:MXD1:NR4A2:ACVR1:DPP4:STAT1:LRRFIP1:ABCG1:MORC2:YWHAH:LGALS1:BHLHE40:ECT2:IGJ:NFKB1:PIK3R1:MEF2C:SNX2:CTNNA1:ADRB2:GRPEL2:EBF1:MXD3:BMP6:HIST1H3H:POLR1C:VEGFA:EPHX2…
