# Supplementary material for: Noise-augmented directional clustering of genetic association data identifies distinct mechanisms underlying obesity
Source: PLoS Genet. 2022 Jan 27;18(1):e1009975. doi: 10.1371/journal.pgen.1009975 (PMC8794082; doi:10.1371/journal.pgen.1009975)
Supplement: S3 Table — Estimates and 95% confidence intervals from MR-Median, the Contamination Mixture method (MR-ConMix) and MR-PRESSO for the association of genetically predicted BMI with 41 cytokines and growth factors. (XLSX) [file pgen.1009975.s004.xlsx]

## Sheet: S3 Table
﻿Results from Mendelian randomization sensitivity analyses of the effect of BMI on cytokines and growth factors. ﻿Estimates and 95% confidence intervals from MR-Median, the Contamination Mixture method (MR-ConMix) and MR-PRESSO for the association of genetically predicted BMI with 41 cytokines and growth factors.
	All genetic variants						Cluster 1						Cluster 2						Cluster 3						Cluster 4						Cluster 5
Cytokine	MR-Median		MR-ConMix		MR-PRESSO		MR-Median		MR-ConMix		MR-PRESSO		MR-Median		MR-ConMix		MR-PRESSO		MR-Median		MR-ConMix		MR-PRESSO		MR-Median		MR-ConMix		MR-PRESSO		MR-Median		MR-ConMix		MR-PRESSO
	Est	CI	Est	CI	Est	CI	Est	CI	Est	CI	Est	CI	Est	CI	Est	CI	Est	CI	Est	CI	Est	CI	Est	CI	Est	CI	Est	CI	Est	CI	Est	CI	Est	CI	Est	CI
βNGF	0.121153	(-0.116, 0.358)	0.139	(-0.121, 0.419)	0.21	(0.063, 0.357)	0.103051	(-0.228, 0.434)	0.034	(-0.446, 0.454)	0.112	(-0.094, 0.318)	0.265967	(-0.182, 0.714)	0.176	(-0.244, 0.736)	0.21	(-0.068, 0.487)	0.18474	(-0.504, 0.873)	0.499	(-0.191, 1.139)	0.322	(-0.116, 0.76)	0.653289	(-0.08, 1.386)	0.643	(-0.497, 1.473)	0.617	(0.08, 1.154)	-0.705498	(-1.887, 0.476)	-0.96	(-2.55, 0.32)	-0.672	(-1.315, -0.029)
CTACK	-0.14977	(-0.397, 0.097)	-0.456	(-0.756, -0.186)	-0.231	(-0.382, -0.079)	-0.19592	(-0.53, 0.139)	-0.452	(-0.972, -0.122)	-0.196	(-0.417, 0.026)	-0.250991	(-0.705, 0.203)	-0.556	(-1.246, -0.156)	-0.395	(-0.675, -0.115)	-0.405994	(-1.07, 0.258)	-0.229	(-1.359, 0.711)	-0.247	(-0.665, 0.17)	-0.0768718	(-0.754, 0.6)	0.106	(-1.194, 0.706)	-0.22	(-0.712, 0.271)	0.956895	(-0.389, 2.303)	1.87	(-0.72, 4.24)	0.881	(-0.299, 2.062)
EOTAXIN	-0.0916766	(-0.248, 0.065)	0.004	(-0.136, 0.154)	-0.061	(-0.16, 0.038)	-0.167655	(-0.387, 0.051)	-0.047	(-0.297, 0.143)	-0.079	(-0.223, 0.065)	0.0337935	(-0.256, 0.324)	0.004	(-0.416, 0.254)	-0.074	(-0.269, 0.12)	-0.0563321	(-0.497, 0.385)	0.182	(-0.258, 0.542)	-0.008	(-0.263, 0.247)	-0.143147	(-0.614, 0.327)	0.076	(-1.104, 0.696)	-0.036	(-0.385, 0.312)	0.394025	(-0.437, 1.225)	0.52	(-1.28, 1.46)	0.109	(-0.473, 0.691)
FGF Basic	0.0787322	(-0.088, 0.246)	0.05	(-0.14, 0.26)	-0.011	(-0.113, 0.09)	0.0480754	(-0.181, 0.277)	-0.037	(-0.257, 0.413)	0.031	(-0.117, 0.178)	0.183599	(-0.127, 0.494)	0.086	(-0.184, 0.366)	-0.043	(-0.241, 0.154)	-0.0737801	(-0.538, 0.391)	-0.141	(-0.551, 0.579)	0.078	(-0.179, 0.335)	-0.246928	(-0.728, 0.234)	-0.614	(-1.184, 0.316)	-0.129	(-0.464, 0.205)	0.118862	(-0.768, 1.005)	0.49	(-0.5, 1.17)	-0.183	(-0.959, 0.593)
GCSF	0.00525296	(-0.159, 0.17)	-0.052	(-0.182, 0.098)	-0.039	(-0.132, 0.055)	-0.0297777	(-0.245, 0.185)	-0.122	(-0.352, 0.228)	-0.044	(-0.18, 0.091)	0.0193401	(-0.286, 0.325)	-0.104	(-0.324, 0.106)	-0.043	(-0.226, 0.14)	0.285618	(-0.161, 0.732)	0.291	(-0.099, 0.701)	0.134	(-0.124, 0.392)	-0.185614	(-0.647, 0.275)	-0.097	(-0.497, 0.313)	-0.147	(-0.467, 0.174)	0.231265	(-0.619, 1.081)	0.289	(-2.401, 1.299)	-0.173	(-0.786, 0.441)
GROα	0.0293719	(-0.204, 0.263)	-0.045	(-0.295, 0.205)	0.047	(-0.093, 0.187)	-3.62e-05	(-0.327, 0.327)	0.02	(-0.34, 0.36)	0.129	(-0.077, 0.335)	0.191556	(-0.264, 0.647)	0.225	(-0.245, 0.725)	0.091	(-0.177, 0.358)	-0.216908	(-0.897, 0.463)	-0.357	(-1.137, 0.433)	-0.095	(-0.51, 0.319)	-0.0324787	(-0.691, 0.626)	-0.57	(-1.3, 0.22)	-0.277	(-0.644, 0.09)	-0.0732613	(-1.366, 1.22)	-0.21	(-1.86, 1.05)	-0.135	(-1.327, 1.057)
HGF	0.321973	(0.166, 0.478)	0.351	(0.181, 0.521)	0.313	(0.216, 0.41)	0.322718	(0.105, 0.54)	0.426	(0.116, 0.636)	0.372	(0.227, 0.516)	0.597682	(0.306, 0.89)	0.48	(0.17, 0.79)	0.354	(0.189, 0.519)	0.202454	(-0.249, 0.654)	0.391	(-0.099, 0.801)	0.319	(0.023, 0.616)	0.125778	(-0.324, 0.576)	0.142	(-0.268, 0.712)	0.012	(-0.294, 0.319)	0.234804	(-0.634, 1.104)	-0.028	(-1.288, 1.172)	-0.097	(-0.903, 0.708)
IFNγ	0.0228128	(-0.138, 0.183)	-0.136	(-0.326, 0.104)	0.02	(-0.08, 0.12)	-0.0851687	(-0.305, 0.135)	-0.366	(-0.576, -0.136)	-0.014	(-0.157, 0.129)	0.155655	(-0.136, 0.447)	0.091	(-0.269, 0.381)	-0.011	(-0.203, 0.181)	-0.189914	(-0.658, 0.278)	0.262	(-0.218, 0.952)	0.182	(-0.105, 0.469)	0.327397	(-0.159, 0.813)	0.639	(-0.291, 1.209)	0.124	(-0.205, 0.454)	0.245757	(-0.655, 1.147)	-0.586	(-1.826, 1.054)	-0.319	(-1.061, 0.423)
IL1B	0.166825	(-0.094, 0.428)	0.111	(-0.109, 0.361)	0.108	(-0.04, 0.256)	0.313606	(-0.032, 0.659)	0.061	(-0.259, 0.551)	0.124	(-0.082, 0.329)	0.0801662	(-0.433, 0.593)	0.243	(-0.097, 0.613)	0.075	(-0.239, 0.39)	0.0130797	(-0.67, 0.696)	-0.127	(-0.717, 0.653)	0.137	(-0.253, 0.527)	0.670094	(-0.065, 1.405)	1.333	(-0.637, 2.113)	0.273	(-0.219, 0.766)	-0.212835	(-1.509, 1.083)	-0.05	(-2.69, 1.04)	-0.569	(-1.592, 0.454)
IL1ra	0.13839	(-0.102, 0.378)	0.226	(-0.094, 0.456)	0.107	(-0.032, 0.245)	0.224293	(-0.096, 0.544)	0.327	(-0.003, 0.637)	0.165	(-0.05, 0.381)	-0.0217766	(-0.459, 0.416)	0.151	(-0.829, 0.641)	0.008	(-0.255, 0.271)	-0.16438	(-0.811, 0.482)	-0.054	(-0.824, 0.506)	-0.037	(-0.379, 0.305)	0.158663	(-0.511, 0.828)	0.005	(-1.095, 1.395)	0.226	(-0.195, 0.647)	0.342167	(-0.852, 1.536)	0.579	(-1.341, 1.799)	0.187	(-0.552, 0.926)
IL2	0.107862	(-0.134, 0.35)	-0.089	(-0.489, 0.201)	0.07	(-0.073, 0.213)	0.190343	(-0.139, 0.52)	0.098	(-0.362, 0.538)	0.11	(-0.107, 0.327)	0.0669911	(-0.371, 0.505)	-0.038	(-0.818, 0.452)	-0.006	(-0.279, 0.267)	0.126462	(-0.542, 0.795)	-0.273	(-0.803, 0.457)	0.189	(-0.151, 0.529)	0.0647214	(-0.64, 0.77)	-0.439	(-1.209, 0.571)	0.108	(-0.382, 0.598)	-0.429453	(-1.656, 0.797)	-1.135	(-2.335, 0.235)	-0.495	(-1.273, 0.283)
IL2rα	0.0946759	(-0.135, 0.324)	-0.098	(-0.338, 0.292)	0.104	(-0.04, 0.248)	0.0613889	(-0.261, 0.383)	0.358	(-0.082, 0.658)	0.183	(-0.019, 0.385)	0.216075	(-0.211, 0.643)	-0.24	(-0.62, 0.43)	0.145	(-0.144, 0.434)	0.0591269	(-0.612, 0.73)	-0.351	(-0.971, 0.249)	0.064	(-0.298, 0.426)	0.07082	(-0.617, 0.759)	-0.368	(-1.078, 0.352)	0.008	(-0.496, 0.512)	-0.508524	(-1.808, 0.791)	-1.936	(-4.926, 1.034)	-1.247	(-2.308, -0.185)
IL4	0.0594059	(-0.11, 0.229)	0.107	(-0.133, 0.257)	-0.002	(-0.097, 0.094)	-0.0484754	(-0.263, 0.166)	-0.28	(-0.53, 0.06)	-0.052	(-0.187, 0.084)	0.0291691	(-0.306, 0.364)	0.027	(-0.383, 0.277)	-0.037	(-0.211, 0.138)	0.442817	(-0.01, 0.896)	0.587	(0.237, 0.977)	0.366	(0.08, 0.651)	0.179454	(-0.287, 0.646)	0.243	(-0.197, 0.703)	-0.056	(-0.395, 0.283)	0.0270172	(-0.847, 0.901)	0.74	(-1.24, 1.79)	0.014	(-0.695, 0.722)
IL5	0.152915	(-0.093, 0.398)	0.324	(0.024, 0.554)	0.082	(-0.073, 0.236)	0.0650157	(-0.275, 0.405)	0.12	(-0.17, 0.48)	0.005	(-0.219, 0.228)	0.239883	(-0.214, 0.694)	0.476	(-0.104, 0.816)	0.12	(-0.184, 0.425)	0.274755	(-0.41, 0.96)	0.434	(-0.346, 1.114)	0.255	(-0.134, 0.645)	0.23412	(-0.485, 0.953)	0.724	(-0.646, 1.354)	0.124	(-0.405, 0.652)	-0.458328	(-1.75, 0.833)	-0.977	(-2.657, 1.303)	-0.084	(-1.027, 0.859)
IL6	0.180943	(0.022, 0.34)	0.238	(0.048, 0.378)	0.173	(0.077, 0.27)	0.0785964	(-0.135, 0.292)	0.096	(-0.084, 0.356)	0.144	(0.005, 0.283)	0.289852	(-0.011, 0.591)	0.194	(-0.066, 0.524)	0.149	(-0.029, 0.326)	0.343041	(-0.11, 0.796)	0.627	(0.127, 1.067)	0.35	(0.082, 0.618)	0.296605	(-0.168, 0.761)	0.308	(-0.242, 0.818)	0.115	(-0.246, 0.476)	0.188095	(-0.635, 1.011)	-0.062	(-1.152, 1.348)	0.184	(-0.364, 0.732)
IL7	0.1987	(-0.043, 0.441)	0.269	(0.039, 0.479)	0.116	(-0.037, 0.268)	0.0600667	(-0.275, 0.395)	0.247	(-0.153, 0.507)	0.153	(-0.073, 0.379)	0.310951	(-0.152, 0.774)	0.417	(0.017, 0.897)	0.148	(-0.165, 0.46)	0.166181	(-0.515, 0.848)	0.348	(-0.312, 0.898)	-0.036	(-0.408, 0.337)	0.526537	(-0.197, 1.25)	1.239	(-1.271, 1.909)	0.135	(-0.361, 0.631)	-0.617766	(-1.871, 0.635)	-0.29	(-2.7, 1.16)	-0.377	(-1.219, 0.465)
IL8	0.248667	(0.011, 0.487)	0.204	(-0.026, 0.444)	0.137	(-0.006, 0.279)	0.280819	(-0.047, 0.609)	0.334	(-0.036, 0.624)	0.19	(-0.019, 0.399)	0.0842067	(-0.355, 0.523)	0.096	(-0.764, 0.516)	0.018	(-0.274, 0.311)	0.520893	(-0.125, 1.166)	0.549	(-0.421, 1.159)	0.259	(-0.087, 0.605)	0.412336	(-0.267, 1.092)	0.915	(-0.245, 1.505)	0.203	(-0.254, 0.659)	-0.898498	(-2.138, 0.341)	-1.24	(-2.35, 0.02)	-0.334	(-1.246, 0.578)
IL9	0.15323	(-0.094, 0.401)	0.146	(-0.214, 0.376)	0.12	(-0.013, 0.254)	0.191187	(-0.122, 0.505)	0.153	(-0.347, 0.503)	0.11	(-0.087, 0.308)	0.13824	(-0.375, 0.651)	-0.008	(-0.388, 0.642)	0.089	(-0.182, 0.359)	0.0565028	(-0.61, 0.723)	0.265	(-0.355, 0.765)	0.188	(-0.192, 0.568)	0.243211	(-0.419, 0.905)	0.546	(-0.624, 1.276)	0.268	(-0.112, 0.648)	-0.953119	(-2.135, 0.229)	-0.633	(-2.123, 0.367)	-0.189	(-0.903, 0.525)
IL10	0.126056	(-0.043, 0.295)	0.268	(0.048, 0.408)	0.083	(-0.021, 0.187)	0.0518537	(-0.181, 0.284)	-0.112	(-0.382, 0.268)	0.043	(-0.111, 0.197)	0.343209	(0.002, 0.684)	0.554	(0.224, 0.784)	0.147	(-0.046, 0.34)	0.301575	(-0.161, 0.764)	0.215	(-0.295, 0.595)	0.133	(-0.171, 0.437)	0.0751437	(-0.398, 0.548)	0.008	(-0.492, 0.738)	-0.114	(-0.452, 0.223)	0.857094	(-0.006, 1.721)	1.202	(-0.108, 2.022)	0.679	(0.075, 1.282)
IL12p70	0.120918	(-0.044, 0.286)	0.06	(-0.09, 0.28)	0.021	(-0.074, 0.115)	0.0732722	(-0.146, 0.292)	0.13	(-0.16, 0.42)	-0.001	(-0.141, 0.139)	0.160104	(-0.159, 0.479)	0.087	(-0.153, 0.407)	0.062	(-0.117, 0.24)	0.148815	(-0.294, 0.591)	0.122	(-0.318, 0.542)	0.128	(-0.141, 0.398)	-0.324318	(-0.79, 0.142)	-0.609	(-1.169, -0.179)	-0.164	(-0.482, 0.153)	0.191513	(-0.618, 1.001)	0.66	(-1.01, 1.42)	0.252	(-0.287, 0.791)
IL13	0.157095	(-0.08, 0.394)	0.088	(-0.142, 0.358)	0.058	(-0.086, 0.201)	0.237186	(-0.087, 0.562)	0.373	(0.003, 0.633)	0.106	(-0.105, 0.316)	0.104029	(-0.331, 0.539)	-0.129	(-0.879, 0.551)	-0.007	(-0.305, 0.291)	0.168037	(-0.477, 0.813)	0.01	(-0.55, 0.61)	0.003	(-0.331, 0.337)	-0.1211	(-0.825, 0.583)	-0.592	(-1.332, 0.388)	0.107	(-0.38, 0.595)	-0.0660227	(-1.32, 1.188)	-0.777	(-2.747, 0.543)	-0.114	(-0.906, 0.679)
IL16	0.217742	(-0.03, 0.465)	0.383	(0.133, 0.573)	0.233	(0.092, 0.375)	0.280235	(-0.048, 0.609)	0.385	(0.085, 0.675)	0.221	(0.015, 0.428)	0.222806	(-0.26, 0.705)	0.583	(0.103, 1.043)	0.457	(0.197, 0.717)	0.269999	(-0.4, 0.94)	0.441	(-0.139, 1.101)	0.27	(-0.106, 0.645)	-0.501374	(-1.17, 0.167)	-0.417	(-1.017, 0.313)	-0.125	(-0.584, 0.334)	-0.518289	(-1.906, 0.87)	-3.11	(-4.5, -0.13)	-0.701	(-1.921, 0.519)
IL17	0.0426287	(-0.132, 0.218)	-0.058	(-0.228, 0.142)	-0.033	(-0.134, 0.068)	0.00177136	(-0.224, 0.228)	-0.125	(-0.385, 0.125)	-0.029	(-0.173, 0.114)	0.0448565	(-0.31, 0.399)	0.088	(-0.222, 0.328)	-0.032	(-0.233, 0.17)	0.439743	(-0.031, 0.91)	0.362	(-0.628, 1.102)	0.142	(-0.141, 0.424)	-0.213753	(-0.689, 0.262)	-0.39	(-0.92, 0.25)	-0.214	(-0.546, 0.118)	-0.039244	(-0.911, 0.833)	-0.01	(-0.83, 1.21)	-0.135	(-0.884, 0.615)
IL18	0.294061	(0.053, 0.535)	0.33	(0.04, 0.56)	0.193	(0.05, 0.336)	0.0983445	(-0.225, 0.422)	0.25	(-0.14, 0.52)	0.172	(-0.043, 0.387)	0.491827	(0.005, 0.979)	0.51	(-0.16, 0.94)	0.273	(0.021, 0.526)	0.337417	(-0.359, 1.034)	0.793	(0.043, 1.373)	0.391	(-0.005, 0.787)	0.290821	(-0.375, 0.957)	0.278	(-0.402, 1.088)	0.149	(-0.291, 0.589)	-0.579745	(-1.919, 0.76)	-2.493	(-4.543, 1.007)	-0.877	(-2.058, 0.304)
IP10	0.316141	(0.083, 0.549)	0.43	(0.19, 0.67)	0.175	(0.027, 0.323)	0.311444	(-0.013, 0.636)	0.418	(0.078, 0.718)	0.235	(0.019, 0.452)	0.27835	(-0.151, 0.708)	0.014	(-0.516, 0.654)	0.073	(-0.195, 0.342)	-0.179511	(-0.851, 0.492)	0.733	(-0.717, 1.573)	-0.074	(-0.492, 0.345)	0.750403	(0.075, 1.426)	1.19	(0.63, 2.01)	0.619	(0.159, 1.08)	-0.421779	(-1.708, 0.864)	-0.452	(-2.152, 0.978)	-0.164	(-1.302, 0.973)
MCSF	0.167474	(-0.121, 0.456)	0.309	(0.069, 0.549)	0.088	(-0.083, 0.26)	0.0174782	(-0.381, 0.416)	0.139	(-0.231, 0.499)	-0.013	(-0.269, 0.243)	0.388964	(-0.204, 0.982)	0.413	(-0.057, 0.963)	0.197	(-0.132, 0.526)	0.173834	(-0.653, 1)	0.228	(-0.572, 0.898)	0.111	(-0.409, 0.631)	0.768488	(-0.018, 1.555)	0.741	(0.101, 1.471)	0.344	(-0.156, 0.844)	0.636893	(-0.81, 2.084)	0.748	(-2.972, 2.098)	-0.234	(-1.139, 0.672)
MCP1	0.238258	(0.077, 0.4)	0.195	(0.015, 0.355)	0.168	(0.068, 0.268)	0.129539	(-0.085, 0.344)	0.215	(-0.105, 0.455)	0.145	(0.006, 0.284)	0.359178	(0.035, 0.684)	0.365	(0.095, 0.625)	0.245	(0.069, 0.421)	0.151111	(-0.309, 0.611)	-0.214	(-0.574, 0.446)	0.121	(-0.197, 0.438)	0.30119	(-0.165, 0.767)	0.32	(-0.3, 0.93)	0.185	(-0.198, 0.567)	-0.316507	(-1.219, 0.586)	-0.896	(-1.626, 0.114)	-0.09	(-0.949, 0.769)
MCP3	0.253412	(-0.194, 0.701)	0.183	(-0.227, 1.453)	0.345	(0.083, 0.607)	0.463111	(-0.119, 1.045)	0.142	(-0.508, 1.742)	0.263	(-0.105, 0.631)	-0.222003	(-1.17, 0.726)	-0.437	(-1.167, 0.473)	-0.028	(-0.548, 0.492)	0.840295	(-0.394, 2.074)	1.676	(0.316, 3.136)	0.819	(0.042, 1.596)	0.722977	(-0.552, 1.998)	3.088	(-0.732, 4.528)	0.945	(0.048, 1.843)	0.734562	(-1.431, 2.9)	2.395	(0.295, 5.605)	1.58	(0.229, 2.931)
MIF	0.27613	(0.04, 0.512)	0.104	(-0.226, 0.414)	0.237	(0.084, 0.391)	0.110114	(-0.221, 0.441)	-0.108	(-0.388, 0.292)	0.27	(0.055, 0.486)	0.420554	(-0.041, 0.882)	0.386	(-0.554, 1.066)	0.257	(-0.048, 0.561)	0.453948	(-0.254, 1.162)	0.289	(-0.691, 1.049)	0.243	(-0.237, 0.723)	0.531368	(-0.161, 1.224)	0.274	(-0.486, 0.994)	0.217	(-0.295, 0.729)	-0.47541	(-1.737, 0.786)	-0.65	(-2.72, 1.07)	-0.512	(-1.472, 0.447)
MIG	0.146349	(-0.09, 0.382)	0.156	(-0.024, 0.346)	0.062	(-0.079, 0.204)	0.133675	(-0.188, 0.455)	0.144	(-0.136, 0.454)	0.115	(-0.093, 0.324)	0.118711	(-0.318, 0.556)	0.149	(-0.291, 0.479)	-0.028	(-0.287, 0.231)	-0.00348493	(-0.667, 0.66)	-0.184	(-0.774, 0.606)	0.07	(-0.299, 0.44)	0.505478	(-0.176, 1.187)	0.686	(0.126, 1.426)	0.254	(-0.238, 0.747)	-0.564297	(-1.793, 0.664)	-0.574	(-2.114, 0.636)	-0.352	(-1.26, 0.557)
MIP1α	0.136586	(-0.108, 0.381)	0.229	(-0.031, 0.479)	0.032	(-0.113, 0.177)	0.0546236	(-0.275, 0.384)	0.414	(0.064, 0.734)	0.076	(-0.126, 0.278)	0.242203	(-0.227, 0.711)	0.128	(-0.412, 0.848)	0.015	(-0.289, 0.32)	0.0975475	(-0.578, 0.773)	-0.053	(-0.863, 0.567)	-0.038	(-0.381, 0.306)	0.398466	(-0.304, 1.101)	0.819	(-0.571, 1.609)	0.099	(-0.421, 0.619)	-0.282311	(-1.514, 0.95)	-0.565	(-1.865, 0.535)	-0.564	(-1.569, 0.442)
MIP1β	0.160822	(0.008, 0.314)	0.211	(0.041, 0.361)	0.094	(-0.002, 0.191)	0.217276	(0.011, 0.423)	0.19	(-0.08, 0.41)	0.184	(0.055, 0.312)	0.140392	(-0.161, 0.442)	0.174	(-0.456, 0.474)	0.042	(-0.154, 0.238)	0.0531603	(-0.396, 0.502)	0.313	(-0.097, 0.723)	0.048	(-0.24, 0.336)	0.0979858	(-0.39, 0.586)	0.321	(-0.639, 0.731)	-0.138	(-0.488, 0.212)	0.137126	(-0.717, 0.991)	0.621	(-0.939, 1.741)	0.06	(-0.703, 0.822)
PDGFbb	0.163674	(0.006, 0.322)	0.075	(-0.095, 0.235)	0.007	(-0.085, 0.1)	0.171525	(-0.041, 0.384)	0.123	(-0.127, 0.403)	0.033	(-0.1, 0.165)	0.125047	(-0.172, 0.422)	-0.006	(-0.356, 0.294)	-0.041	(-0.21, 0.128)	0.193764	(-0.251, 0.638)	0.275	(-0.125, 0.675)	0.127	(-0.154, 0.408)	-0.0327251	(-0.466, 0.4)	-0.04	(-0.37, 0.37)	-0.123	(-0.403, 0.157)	0.0729927	(-0.842, 0.988)	-0.06	(-1.67, 2.32)	0.218	(-0.594, 1.029)
RANTES	0.0459638	(-0.202, 0.294)	-0.005	(-0.195, 0.245)	-0.011	(-0.154, 0.132)	-0.0950197	(-0.43, 0.24)	0.018	(-0.262, 0.418)	-0.02	(-0.224, 0.183)	0.194382	(-0.294, 0.683)	-0.105	(-0.475, 0.285)	0	(-0.277, 0.277)	-0.0704835	(-0.8, 0.659)	0.184	(-0.626, 1.304)	0.012	(-0.471, 0.494)	0.156677	(-0.522, 0.835)	0.115	(-0.975, 1.095)	-0.017	(-0.42, 0.386)	0.0218248	(-1.293, 1.337)	-1.66	(-3.04, 2.33)	-0.023	(-1.031, 0.986)
SCF	0.130521	(-0.032, 0.293)	0.117	(-0.083, 0.287)	0.092	(-0.002, 0.186)	0.102277	(-0.117, 0.321)	-0.139	(-0.359, 0.121)	0.046	(-0.09, 0.183)	0.229203	(-0.089, 0.548)	0.197	(-0.053, 0.437)	0.116	(-0.049, 0.281)	0.374202	(-0.092, 0.841)	0.935	(0.285, 1.555)	0.326	(0.033, 0.62)	0.0206834	(-0.456, 0.498)	0.26	(-0.89, 0.99)	-0.026	(-0.379, 0.327)	-0.0613792	(-0.882, 0.759)	-0.437	(-1.317, 2.203)	0.176	(-0.403, 0.754)
SCGFβ	0.133832	(-0.111, 0.379)	0.107	(-0.163, 0.417)	0.062	(-0.087, 0.21)	0.316496	(0.002, 0.631)	0.476	(-0.054, 0.886)	0.165	(-0.042, 0.371)	0.0677192	(-0.389, 0.524)	-0.003	(-0.413, 0.407)	-0.065	(-0.348, 0.217)	0.164269	(-0.53, 0.858)	-0.143	(-0.823, 0.837)	0.108	(-0.405, 0.621)	0.177799	(-0.501, 0.856)	-0.057	(-0.617, 0.823)	0.167	(-0.325, 0.66)	-1.01277	(-2.333, 0.307)	-2.53	(-4.6, 2.49)	-0.785	(-1.927, 0.357)
SDF1α	0.0527467	(-0.118, 0.224)	0.035	(-0.165, 0.195)	0.021	(-0.082, 0.124)	-0.0285861	(-0.255, 0.198)	-0.059	(-0.289, 0.161)	-0.003	(-0.152, 0.147)	0.135263	(-0.222, 0.493)	0.255	(-0.035, 0.655)	0.054	(-0.128, 0.237)	0.19576	(-0.266, 0.658)	0.56	(-0.19, 1.01)	0.311	(0.015, 0.607)	-0.100359	(-0.569, 0.369)	-0.186	(-0.846, 0.274)	-0.239	(-0.597, 0.119)	-0.300084	(-1.243, 0.643)	-1.09	(-2.1, 0.43)	-0.303	(-1.088, 0.482)
TNFα	0.202212	(-0.044, 0.449)	0.139	(-0.141, 0.329)	0.147	(0.005, 0.288)	0.210197	(-0.12, 0.54)	0.221	(-0.099, 0.571)	0.156	(-0.052, 0.365)	0.259058	(-0.189, 0.707)	0.044	(-0.356, 0.404)	0.118	(-0.144, 0.38)	0.143761	(-0.538, 0.825)	0.349	(-0.521, 1.039)	0.198	(-0.204, 0.6)	0.0250863	(-0.671, 0.721)	-0.067	(-0.777, 0.873)	0.305	(-0.149, 0.759)	-0.724286	(-2.013, 0.565)	-0.687	(-2.207, 0.453)	-0.532	(-1.653, 0.589)
TNFβ	-0.13274	(-0.486, 0.221)	0.01	(-0.41, 0.36)	-0.024	(-0.233, 0.185)	0.205033	(-0.288, 0.698)	0.069	(-0.431, 0.649)	0.032	(-0.293, 0.357)	-0.33753	(-1.006, 0.331)	0.06	(-0.77, 0.85)	-0.012	(-0.378, 0.355)	-0.501982	(-1.524, 0.52)	-0.549	(-1.559, 0.581)	-0.213	(-0.816, 0.389)	-0.0732939	(-1.108, 0.961)	0.442	(-1.198, 1.422)	0.062	(-0.609, 0.733)	-0.740333	(-2.542, 1.062)	-1.697	(-4.027, 1.523)	-0.728	(-1.788, 0.332)
TRAIL	0.340945	(0.178, 0.503)	0.451	(0.241, 0.601)	0.271	(0.175, 0.366)	0.344163	(0.123, 0.565)	0.447	(0.247, 0.677)	0.275	(0.139, 0.41)	0.469462	(0.154, 0.785)	0.471	(0.071, 0.781)	0.281	(0.104, 0.458)	0.108447	(-0.36, 0.576)	0.27	(-0.34, 1.41)	0.235	(-0.038, 0.508)	0.220065	(-0.245, 0.685)	0.53	(-0.37, 1.26)	0.298	(-0.061, 0.657)	0.475533	(-0.364, 1.315)	0.414	(-0.396, 1.804)	0.127	(-0.611, 0.864)
VEGF	0.164129	(-0.003, 0.331)	0.264	(0.104, 0.394)	0.062	(-0.044, 0.168)	0.171067	(-0.062, 0.405)	0.246	(-0.024, 0.456)	0.073	(-0.085, 0.231)	0.142711	(-0.164, 0.45)	-0.166	(-0.506, 0.404)	0.065	(-0.128, 0.258)	0.0484497	(-0.431, 0.528)	0.215	(-0.215, 0.575)	0.065	(-0.24, 0.37)	0.225306	(-0.247, 0.697)	0.38	(-0.07, 0.74)	-0.017	(-0.35, 0.315)	0.957824	(0.007, 1.908)	1.07	(-2.65, -0.71), (0.10, 0.221)	0.122	(-0.677, 0.921)
